# Supplementary material for: Strain-level genomic variation of Streptococcus mutans and early childhood caries in preschool children from Northern Arizona and Hawaii
Source: PeerJ. 2026 Feb 25;14:e20808. doi: 10.7717/peerj.20808 (PMC12949586; doi:10.7717/peerj.20808)
Supplement: Supplemental Information 6 — The primers and their positions with the reference sequences are provided along with the expected amplicon sizes in the reference genome. The locus ID is provided for amplicons within or between coding regions. [file peerj-14-20808-s006.xlsx]

## Sheet: TableS2
Supplemental Table 2: Primers used in AmpSeq assay. The primers and their positions with the reference sequences are provided along with the expected amplicon sizes in the reference genome. The locus ID is provided for amplicons within or between coding regions.
Primer Name	Start	End	Size	Accession	Locus	P1	P2	AmpRefSeq	P1_Len	P2_Len	AmpStart	AmpEnd
SM_321544_321690	321544	321690	146	NC_004350.2	SMU_339	TTGAATGCCACTTTAT	AGGTTACTTGAATAGAGGA	TTGAATGCCACTTTATTTTTGATAGCATCTTATATCAAAATAGTTGTGGAAGTAGGACTATACGGTTTGGTCATTGCTTTATTCTTACCTTTTGTTAAAAAATATTTTGGCCTTTTTGAACGTCTTTTCCTCTATTCAAGTAACCT	16	19	321560	321671
SM_383634_383959	383634	383959	325	NC_004350.2	SMU_408-SMU_409	ATTACACAAGGAATTGCAA	TGACCAATTCTCTGTCC	ATTACACAAGGAATTGCAACTGGTTTTCTCTTTTATACCTTCTCTAAATTGATTAAAAAGGAAGCCAAGGATATTCATCCTATTATTTGGGTGCTTGATGTTCTTTTCATCTTGAACTTTATCAGTTTAGCTGTTTTGTAATTAAAAATTTTATTTGCATATATAGGAGCTCAGATAAGGCTGAGCTCCTATTTTTACTGTCCAAAGCGAAATTTTTTCATTTTTTGAAAATAGTTGGAAGTAATAAAAGATTTTGATATAATACTTTTATGTTTTATAGCCAAAATGAAAATCAGCTAATGGCTCTTGGACAGAGAATTGGTCA	19	17	383653	383942
SM_678694_678949	678694	678949	255	NC_004350.2	SMU_719c	GATAGGAAGCAAAATGT	ATCGTCGCTTCTACTTTC	GATAGGAAGCAAAATGTTATCAGAAAATTTCCTTCCTATCTTAATTTTATTTCTAAACGATTAGTCCATAAATGATTTTTCTCATATTTATTGCTTGCTTGCAATAGTTTTAAAGAAATAAGAGAGAATAGCTTAAACCTCACTCTCTGAGATTGTAAAAATGCTTATTTTTGATATAGTGAGAAAACTTTTCTTTAGCTTCGACAAAAAGACCATCTTTGATAAGCATCTCCTTGGGAAAGTAGAAGCGACGAT	17	18	678711	678931
SM_1485952_1486078	1485952	1486078	126	NC_004350.2	pacL	TCAAGTCATCATCTGA	TCATGGTTACAGGAGATTA	TCAAGTCATCATCTGACATATCTTTTAATTCTAGGCCAGTAACCACACGAGGATTTTCCCCTTGGACAATACCAATCCGTTTGGCAATGCTGACAGCTGTTAAACCATAATCTCCTGTAACCATGA	16	19	1485968	1486059
SM_273835_274152	273835	274152	317	NC_004350.2	SMU_287-SMU_289	ATATCAGCAGCAATCTTTG	TTTTCATTATAGCACACT	ATATCAGCAGCAATCTTTGCTAGAATAGTTTGAAATCAGCTATAACGCTAAAGACTTTTGAACTTTTAAGTTTTTGTGAGCCCTAAGAGGTGACGAACAGCTAATCGCTAATGTCTGAGAAGACCAAACTGGTCTTCTTTTTTGCTAGCTACAGTTGTTAAGAGTTCCGTAACATAAAGCAGCTCATAGATTGCTCTCGAATGCAAGTTTCTTATGGTAAAAAATCGCTGTTCCTATTAAAAGAAATCGTATAAGAGGCCGATTTTTTATCTGGATGATAAAGTAAGTCTCGCTTTAAAAGTGTGCTATAATGAAAA	19	18	273854	274134
SM_1838679_1838987	1838679	1838987	308	NC_004350.2	SMU_1961c-SMU_1963c	GAATACACCCTACTTTCT	AAGTAGGTGAAACAAA	GAATACACCCTACTTTCTTTTTTATTTCATTTTTATTTTACATTTTTTGAAAACGCTTTTGCAGTGTCATTTGTCATTTTCATATCCCTGACAAATGTCATCTGTTGAATGACATTTGTCAGGGATTTAAATTTTTTAAACTGATCAAAGAAAATACTGTAAACACCCAAAATATAAAGAAACTGCTCAAAAAGTCTGGGAATTTTTTCCAGACTTTTTGATGTTATTGACAGCAAGTAGAACAGCCTTTGTATCTTTTAGATTTTTTTATCTAAATTCCCAGTTTTTTTTATTTGTTTCACCTACTT	18	16	1838697	1838971
SM_1474614_1474801	1474614	1474801	187	NC_004350.2	SMU_1546-SMU_1547c	GATTATGGCAACCAATTATATC	CAGATGCAGTCCGTATTG	GATTATGGCAACCAATTATATCATCAGTAAATTCTTTATTTTTAAAAATAAAAAAGAGAGCTAATCAGGGCTCCCTACAACCAATCATTCCTTTTGTTAAAAAATTCAGTTCTGCAAAACAGGTACTGAATTTTTTTCTTCTGCAGTTAGAACCAACCATTCTCACGCGCAATACGGACTGCATCTG	22	18	1474636	1474783
SM_537854_537983	537854	537983	129	NC_004350.2	SMU_575c	CTTATTTTCCCTCTACTTTC	TAGTCATTGTCACCTATATC	CTTATTTTCCCTCTACTTTCTTACTAAATTTCTTTTCAAAGCTATGAGCAGTCCATTTTTCCCACAGACTTGCCACATTCACCTTTTTGATAGACAGAATAATAGAAGTGATATAGGTGACAATGACTA	20	20	537874	537963
SM_1625084_1625385	1625084	1625385	301	NC_004350.2	SMU_1716c-SMU_1717c	AATAGGATCATTAACAG	ACATTGATTTTGCTCC	AATAGGATCATTAACAGATAACTCTGAATCTCCATTATGAAAAATAGCATCCACTTTACCTAAGTAACGATTTTTTATCTCCTGAACAATTTGTTGATCACCATGAGAATCACTCATGATAATTAATGTGCGTTCTGCCATGCTGGAAATACCTCCATAAGCTTCTTAACAGCTTGTCCTCTGTGAGAAATAATATTTTTTTCGTGATTTGAAAGTTCTGCTGCGGTCTTCCCTGTTTCTCCCACTAAAAACAAAGGATCATAGCCAAAACCATTATTCCCTTTAGGAGCAAAATCAATGT	17	16	1625101	1625369
SM_1653476_1653750	1653476	1653750	274	NC_004350.2	akh	AGCAGGTATCATTGTTA	ATGTGGCTTATGCACAA	AGCAGGTATCATTGTTACAAGTGAACCCGGTAATGCTCGGATTATTCCATCCAGTTATGATAAATTAGAAGAATTGCGAGATAGTGACGAAGTTTTAGTTATTCCTGGTTTTTTCGGTGTCACAATTGATAACCAAATCTGTACTTTTTCGCGCGGTGGTTCTGATATTACTGGTTCAATTGTCGCAGCGGGTGTTAAAGCTGACCTTTATGAAAACTTTACCGATGTAGATGGTATCTTTGCAGCTCACCCAGGGGTTGTGCATAAGCCACAT	17	17	1653493	1653733
SM_245912_246051	245912	246051	139	NC_004350.2	oppB	ATTGTAGGTGCTCTTT	ATTGCAGACGATAGCC	ATTGTAGGTGCTCTTTCTGCGCGTCATCAAAACGATAAAATAGATGGTCTCCTAAGTGTCATTTCAACACTTGGTTATTCTGTTCCTTCTTTCATTTTGGCTGTTTTCTTGTTGAATACATTTGGCTATCGTCTGCAAT	16	16	245928	246035
SM_1716656_1716971	1716656	1716971	315	NC_004350.2	gatB	ACACGCATTAACAAGGT	TGATATGCGTTCACCT	ACACGCATTAACAAGGTTTCCCCTGTTGCTTCATCATAACGGCGTGTTTCTTGCTGAATTTGACCTCCAGAACGAAGGACTTCTGCCTGACGTTTTTCTTCATAGGCCAAACCGCGACGAACAAAATTGAAAGAGTTCAAGTTTTTCAACTCAGTCTTGACACCAAATGCTTCCTGTCCATAAGGACGGATAGAAATGTTGGCATCCACCCGCATGGAGCCTTCTTCCATTTTGACATCTGAAATTCCTGTGTATTGGATAATTTCTTTAAGGGCTGTTAAATAAGCATAAGCTTCCTCAGGTGAACGCATATCA	17	16	1716673	1716955
SM_158538_158665	158538	158665	127	NC_004350.2	pnpA	AACGGTTCCTCATCACA	CGGTATAGTTAGTGCCG	AACGGTTCCTCATCACAGGCTTCAATTTGTGCGGGAACGCTCGCTCTTATGGCTGGGGGTGTACCTATCAAAGCACCAGTTGCAGGTATTGCTATGGGACTTATCTCAGACGGCACTAACTATACCG	17	17	158555	158648
SM_665062_665253	665062	665253	191	NC_004350.2	SMU_704c	TAAACGATAGCCTGTC	CTTTGCTTATACTACTTGG	TAAACGATAGCCTGTCACTTGCACTGTAGTAGTTTGTTTCAATTTATCTGTATTAAAATCGAATAAATGGCAATAGAGTGTTACTGGTGATGTTGGTGTAATTGTAGCTGTTTGCGTTATTTCATAAGAGTTGGAAATATGAAAACGATGTTGGTAAAGAAGACCACTAAATCCAAGTAGTATAAGCAAAG	16	19	665078	665234
SM_42990_43234	42990	43234	244	NC_004350.2	SMU_38c	AACAACGAGAGGAGAT	GCGGTCTCTACAGTATT	AACAACGAGAGGAGATGCAAGTCGTCTTCTCTTTTTGTATGTCTAAAACAATGATCATTTTAGTTTTAGAAATGATTAAAACGATTTGTTGAATCTGCTCATGCTTAATCTCGAAAAACTCAGCTTCTCGCTTAACTATCCTTCATACGTTTTATGGTGTTTAAGGCTGTAGTGACCAGTTCATTAACAGGCATTGTTTGGTGATCTGTTTTTAACCATTCATCAAAAATACTGTAGAGACCGC	16	17	43006	43217
SM_631692_631893	631692	631893	201	NC_004350.2	citB	GGACTTTCTTTGGCAG	AGTGTAGGAAGGCAGAT	GGACTTTCTTTGGCAGATCGCGCAACGGTTGCCAATATGGCACCTGAATATGGTGCAACCTGTGGTTATTTTCCGATTGATGATGAAACCTTAAATTATATGAAATTGACCAATCGCTCAGCAGAACACATTGCACTAACAAAAGAATATGCCAAGCGAAATCATCTTTACCATGATATGACAAATCTGCCTTCCTACACT	16	17	631708	631876
SM_1069643_1070000	1069643	1070000	357	NC_004350.2	ciaH	ATTTATTAGCAAGCAGGCG	TCAACCGTCAAATTAAGAC	ATTTATTAGCAAGCAGGCGAGCTTCAAACATTACTCCTTGTGGTTTTTTATCTTTAACAATAATGCTGCCTTTTAAGCTGTCTGTTATTTGTTTTGCCAAAGACAAACCAAGTCCGAACCCACCCTTTTGTCGTGTTCTGGCTTTATCGACGCGATAAAAACGATCAAAAATTTTCTTCTTATCCTCGTCTGAAATACCTTGACCATTGTCCGCAACTGAAAAAATTAAACTGCGATCAGTTGTCTTGACGTCCAGCCAAATTTCCCCGTCGTTATCTGTATATTTGACAGCATTATCAAAAAGAATAGTCATTAATTGCTTCAGCAAAGTCTTATCTGTCTTAATTTGACGGTTGA	19	19	1069662	1069981
SM_1965504_1965791	1965504	1965791	287	NC_004350.2	SMU_2092c	AGAGTCTTGGTTACATA	AATCAGTTAATAGAGCTTT	AGAGTCTTGGTTACATATTGTAAAAGATCGCTGGCATCCTGCATTTTGGCTCGATAATCTTGGACAATGGGAAGCTTATCCAAACTCTCTCCCATTTTTTGCGCCTTTTGATCAGCTTCTTTTTGAGCTTTACTTTTTTCAATCCTTTGAAAAAGAACAGCGTCTTGTTGATAGCCTTTCATATCATGTGCTACTTTCTTTAACTCCGGTAAGGCTTTAATCTTTTTTTCAACAGCTTGAAAAGCTTGCACACTGTCATGTTCCTGCAAAAGCTCTATTAACTGATT	17	19	1965521	1965772
SM_488811_489100	488811	489100	289	NC_004350.2	SMU_522	GTCAATCCGCTCAAACA	CAACATGACTGATACGT	GTCAATCCGCTCAAACAGCGTATCGTTCAAGAGTCAGCAGATGGGACAGTCAAGTATTTATTCGAGTTGCCAGATGGCATGTTAATTGAGACGGTGTTAATGCGTCAGCATTATGGTCTTTCTGTTTGTGTGACGACACAGGTAGGCTGTAACATTGGTTGTACTTTTTGCGCCAGTGGCTTGATCAAAAAGCAACGTGACCTTAATAATGGCGAAATTACAGCGCAGATTATGTTGGTGCAAAAATATTTTGATGAACGCGGTCAGGGTGAACGTATCAGTCATGTTG	17	17	488828	489083
SM_287730_288008	287730	288008	278	NC_004350.2	SMU_299c-tgt	TTAGTAGAGATGTGAACCTGA	GTCATTAAGCGTACTT	TTAGTAGAGATGTGAACCTGAAACCGTTTCAAAAATCGGAACTTAACTGTTGTGTTAATCGAGTGCAAAAGACTTAATTGGATATTAATTTTCAATTGAAATTTAAAATGAAAAATCCTGCAGCACTTAGTATGAGGAATTGATAATATGTCTCATATTAAATTAGTGTAAAAGCAGCCAATAGCTATAGTGTAGGTGTTTCGTTGTACCTTTCTTACACTCTCAAAAAAACTGATAAAAAGTTCTGAATGCAGATTCTAAGAAGTACGCTTAATGAC	21	16	287751	287992
SM_552101_552393	552101	552393	292	NC_004350.2	furR	ATCATGTATTAACGCA	GTAATCTTACCACAAGACT	ATCATGTATTAACGCATTTAAAAGAAAAGCATATTCGTATTACTAAAACACGAGAAGCTGTTATTTCTTATATGATTAACTCCCGCCGTCATCCGAGTGCAGAACAAATTCATAAGGATCTTCTTCCTCAGTATCCAAGTATGAGTTTAGCAACGGTCTATAATAATTTGAAAGTCCTGATTGATGAAGGCTTTGTTGTTGAATTAAAGCTAAGCAATGATAATACAGCTTATTTTGATTTTATGGGGCATCAGCATTTGCATGTTGTTTGTGAGTCTTGTGGTAAGATTAC	16	19	552117	552374
SM_1091160_1091387	1091160	1091387	227	NC_004350.2	SMU_1153c	AAAAGCCAGAAAATACTAAT	CATTATGTTGGTGGCTATTT	AAAAGCCAGAAAATACTAATTTTTACCATTTTCATCATTTGTTTCTCAATCGTTTGTTGGATCTTTTATAACAAAGGTATTCTTGGAAGATAAAAAAGAACCAAGATGACTCTTTTCTAAAACTATTACTTTTTCAAACTCTTGTTAATGGCATCATAAATGGGATTATTTTCATGTGGCACACAATCTTGCACCCATTCCCACCAGAAATAGCCACCAACATAATG	20	20	1091180	1091367
SM_1488913_1489140	1488913	1489140	227	NC_004350.2	glgP	CCCTTATTTTCCTTGAGAT	TTCAATAACAAGACTAATGGGAT	CCCTTATTTTCCTTGAGATAGCGTTTAAGAGCTAATTTATTGTTAAATTTGATTTTTGCCAGCTGCTCATGAACAGTCTTGTCATCCGCAAAAGCCAATAATTTTTCAAGCTCAGTCGCATCTTCAAGATAACCTTCACCAATTAATTCTTTAATATAGGCTGCCAAGTCTTGATTGGCAAATTCCAACCACCGACGGAAAGTAATCCCATTAGTCTTGTTATTGAA	19	23	1488932	1489117
SM_42919_43317	42919	43317	398	NC_004350.2	purH-SMU_38c	TGAGACATTTTAGACATTG	TGCTTATACCACTGTCAT	TGAGACATTTTAGACATTGATGGGTATTTAAAAATTAGCTCATTATTAACTGTAATGAATGACTTATCGCTAACAACGAGAGGAGATGCAAGTCGTCTTCTCTTTTTGTATGTCTAAAACAATGATCATTTTAGTTTTAGAAATGATTAAAACGATTTGTTGAATCTGCTCATGCTTAATCTCGAAAAACTCAGCTTCTCGCTTAACTATCCTTCATACGTTTTATGGTGTTTAAGGCTGTAGTGACCAGTTCATTAACAGGCATTGTTTGGTGATCTGTTTTTAACCATTCATCAAAAATACTGTAGAGACCGCCGATAATGAATCTACTATCATAGGAGATTTGTCTTTGATCACTGTTTGTGATGTGCCAAGGTGCCATGACAGTGGTATAAGCA	19	18	42938	43299
SM_1956945_1957174	1956945	1957174	229	NC_004350.2	recA	GTTGTTTCTGGATTACC	TTGATTCTGGCGCTGT	GTTGTTTCTGGATTACCAAACATAATACCAACTTTTTCCCGCAATTGATTAATAAAAATGGCAATGGTTTTTGTTTTATTTATTGAAGCTGATAATTTACGCATCGCTTGACTCATCATGCGTGCTTGTAAGCCAACATGACTATCACCAATATCTCCGTCAATCTCCGCACGTGGTACTAAAGCTGCCACTGAGTCAACAACAACTAAATCAACAGCGCCAGAATCAA	17	16	1956962	1957158
SM_1446247_1446499	1446247	1446499	252	NC_004350.2	covR	TGTACTCTGGACGACTAGG	TTATTATTGGGGACTTG	TGTACTCTGGACGACTAGGTGTATCTTCAATTTTTTCACGCAGACGACGAACAGTAACATCAACAGTACGGACATCTCCAAAATAATCATAGCCCCAAACCGTTTCAAGTAAATGTTCACGCGTCATCACCTGACCTGTGTGTGTCGCTAAGTGATGCAACAACTCAAACTCACGGTGAGTTAACTCTACCTCTGTTCCACGTTTTTTAGCAACAAAAGCATCTGGTAAGATTTGCAAGTCCCCAATAATAA	19	17	1446266	1446482
SM_1417064_1417241	1417064	1417241	177	NC_004350.2	lacE	ATCTGGTTGGTCTTTTCT	TCTGTTGATCGCTTATGTTC	ATCTGGTTGGTCTTTTCTAATTGGCGGTTCATCGAATCCGTTAGTGATTTAGCAGTTGTACCAGCCACTAGGAAACCAATAATCCCCATCGTATAGTTATAGGGTGTCATCAACATGTTTTCAATACCTTTTGGCCAAGTAAAACCAAAGATATTAGGAACATAAGCGATCAACAGA	18	20	1417082	1417221
SM_352520_352817	352520	352817	297	NC_004350.2	SMU_370	GTTAATGGCAGACAACGGT	ACGCGAGGCTTATTAATTAA	GTTAATGGCAGACAACGGTCAATCCTCTATTTTAGGACAAGACTCCCGCAAATTAACGAGTCAAGAATTAGGGAAAATCGGTTTAGTCGGTGATACCAGCGGTTTTTATGAAAAAATATCTCTTTATAATAACCTGCTTTTTTATAGTAAATATTATGGGATAGATAAAACGACTGTTGACAATCTCCTCAAGCGGGTCGGTCTCTATGACAGTCGAAAAACAGTAGCCGAAAAGCTCTCGACAGGTATGAAGCAGCGGATGCTTCTAGCTCGTGCATTAATTAATAAGCCTCGCGT	19	20	352539	352797
SM_169322_169635	169322	169635	313	NC_004350.2	SMU_RS00840	ATTACAATCCGACAATT	TTTCTCTCTTGTCATTAT	ATTACAATCCGACAATTAACCTTTGCATCAAGATTTGTAAAGCTTTGGACAAGAGTTTAGATGAGCTGTTTTGGGAAGAATAAAAGAGGTTCATCTTAGAACAGTTTTATTTATTTACTTTATTAAGAGTGGGAAAAATTGCTAAATTTTTAAAGTAAGTTTCACCGCTCAGGATAGTGGAAGCTCATTTGAACAAAAGTGTAAAAGCAGTATAGTTCGTCTCGAACGTAATTTCATCATAAAAATCTGTCTCATGCTGACTTCTGGTTTAGAAAGTGAAGCAGAACTTACTTTAATAATGACAAGAGAGAAA	17	18	169339	169617
