# Supplementary material for: Strain-level genomic variation of Streptococcus mutans and early childhood caries in preschool children from Northern Arizona and Hawaii
Source: PeerJ. 2026 Feb 25;14:e20808. doi: 10.7717/peerj.20808 (PMC12949586; doi:10.7717/peerj.20808)
Supplement: Supplemental Information 7 — (1) unique, anonymized, participant IDs, (2) location of sample collection (Arizona or Hawaii), (3) age in years, (4) gender, (5) binary indicator for ECC (0=No caries, 1=one or more caries (treated or untreated)), (6) binary indicator for S. mutans detection (0=not detected, 1=detected in qPCR and/or amplicon sequencing in any sample), (7) ECC risk category based on KNN classification (0=low (¡25%), 1=medium (25–50%), and 2=high(¿50%)), (8) Race/Ethnicity classification, (9) clade ID for S. mutans sequences. [file peerj-14-20808-s007.xlsx]

## Sheet: TableS3
Supplemental Table 3: Participant metadata.
SubjectID	Location	Age	Gender	Cavities	S.mutansColonization	ECCRiskCategory	RaceEthnicity	Clade
hi00795d	Hawai'i	4	Boy	0	0		Asian
hi06454b	Hawai'i	5	Girl	1	1	1	NHPI	44
hi06b344	Hawai'i	4	Girl	0	0		NHPI
hi06b98b	Hawai'i	4	Boy	1	1	2	NHPI	12
hi0a6a6b	Hawai'i	4	Girl	0	0		NHPI
hi0a82de	Hawai'i			1	0
hi0ae940	Hawai'i	5	Boy	0	0		NHPI
hi0c8a43	Hawai'i			1	1	1
hi118be9	Hawai'i			0	0
hi1411bf	Hawai'i	3	Girl	1	0		Asian
hi17bef7	Hawai'i	3	Boy	0	1	0	NHPI
hi186335	Hawai'i	4	Girl	0	0		NHPI
hi196a24	Hawai'i	4	Boy	1	1	2	NHPI
hi1d41fc	Hawai'i	2	Girl	0	0		Asian
hi1df540	Hawai'i	4	Boy	0	0		Asian
hi215ff7	Hawai'i	4	Girl	0	1	0	Asian	72
hi2279e1	Hawai'i	4	Girl	0	0		NHPI
hi242a18	Hawai'i			0	1	1		178
hi255952	Hawai'i	3	Girl	0	1	1	Asian	12
hi27a78e	Hawai'i			0	0
hi2afd2d	Hawai'i	4	Boy	1	1	2	Asian	93
hi2b1aa8	Hawai'i	3	Girl	0	0		NHPI
hi2b3796	Hawai'i	4	Boy	0	0		NHPI
hi2c34a7	Hawai'i	3	Girl	0	1	1	Asian
hi2d2299	Hawai'i	4	Boy	0	0		NHW
hi2d56a1	Hawai'i	4	Girl	0	0		NHPI
hi316839	Hawai'i	3	Boy	1	1	2	NHPI
hi31f185	Hawai'i			0	0
hi370fd5	Hawai'i	4	Boy	0	1	0	Asian	161
hi378120	Hawai'i	4	Girl	1	0		Asian
hi38435d	Hawai'i	3	Girl	1	1	2	NHPI	12
hi3a36f7	Hawai'i	4	Boy	1	1	1	NHPI	62
hi3b4a65	Hawai'i	4	Boy	0	0		NHW
hi3b5d98	Hawai'i	4	Girl	1	1	2	Asian	93
hi3be1f6	Hawai'i	4	Girl	0	0		Asian
hi3ddc14	Hawai'i	4	Boy	1	1	1	Asian	178
hi3e5fe5	Hawai'i	4	Girl	0	0		NHPI
hi407a02	Hawai'i	4	Boy	1	1	2	NHPI
hi40928f	Hawai'i	4	Boy	0	1	2	NHPI
hi43a7c6	Hawai'i			0	0
hi444251	Hawai'i			1	1	2		2
hi45f714	Hawai'i	4	Girl	0	1	1	Asian	304
hi495ac5	Hawai'i	3	Boy	0	0		NHPI
hi4a3d26	Hawai'i	5	Boy	1	1	1	NHPI
hi4b88b3	Hawai'i	4	Boy	0	1	1	NHPI
hi4b9115	Hawai'i			0	1	0
hi4c6df5	Hawai'i	4	Girl	0	1	2	NHPI	159
hi4e9e8d	Hawai'i			1	0
hi514c76	Hawai'i	4	Girl	1	1	2	NHPI
hi520a00	Hawai'i	3	Boy	0	0		Asian
hi528bd9	Hawai'i	4	Girl	0	1	0	Asian
hi564d63	Hawai'i	4	Boy	1	1	1	Asian	160
hi59472d	Hawai'i	5	Boy	0	1	1	NHPI	2
hi59cbdb	Hawai'i	4	Boy	0	0		Asian
hi5af6cb	Hawai'i	3	Girl	0	0		NHPI
hi5e4709	Hawai'i	4	Girl	0	1	1	NHPI	2
hi5f0351	Hawai'i	3	Boy	0	0		Asian
hi639aca	Hawai'i	4	Girl	0	1	0	Asian	12
hi66d0b8	Hawai'i	4	Girl	0	0		NHPI
hi6763f5	Hawai'i	4	Boy	1	0		NHPI
hi67c343	Hawai'i	4	Girl	0	1	1	Asian	44
hi687ee1	Hawai'i	3	Girl	0	1	0	NHW
hi71ff6a	Hawai'i	3	Boy	0	0		Asian
hi739e2e	Hawai'i	4	Girl	0	0		NHPI
hi74f07b	Hawai'i	3	Girl	0	0		NHPI
hi75f9bc	Hawai'i	4	Boy	0	1	2	NHW	93
hi76d65b	Hawai'i	3	Girl	0	0		Asian
hi770fc8	Hawai'i	2	Girl	0	1	1	NHPI
hi775081	Hawai'i	4	Girl	0	1	1	Asian	24
hi7a3803	Hawai'i	5	Boy	0	0		Asian
hi7d70d9	Hawai'i			1	0
hi837e56	Hawai'i	3	Boy	0	0		Asian
hi848cb4	Hawai'i	3	Girl	0	0		Asian
hi861121	Hawai'i	3	Boy	1	1	2	Asian	93
hi88d2b8	Hawai'i	4	Boy	1	0		NHPI
hi88e7a7	Hawai'i	4	Girl	0	0		NHW
hi896ef9	Hawai'i	3	Boy	0	0		NHPI
hi8ba5ee	Hawai'i	6	Girl	1	0		NHW
hi8c39c1	Hawai'i	3	Girl	0	0		Asian
hi8c68aa	Hawai'i	5	Girl	1	1	2	NHW	160
hi8defde	Hawai'i	3	Girl	0	0		NHPI
hi8f43cc	Hawai'i	3	Boy	0	0		NHPI
hi8fdd21	Hawai'i	4	Girl	1	1	0	NHPI
hi9299b3	Hawai'i	5	Boy	0	0		NHPI
hi974c6c	Hawai'i	5	Girl	1	1	2	Asian
hi9861be	Hawai'i	3	Girl	0	1	2	NHPI	12
hi9909a2	Hawai'i	3	Boy	0	0		NHPI
hi994748	Hawai'i			0	1	1		93
hi9a1c75	Hawai'i	4	Girl	0	1	0	Asian	161
hia08174	Hawai'i	3	Girl	0	1	1	Asian
hia1cfb8	Hawai'i	3	Girl	0	0		NHPI
hia1d506	Hawai'i	5	Boy	0	0		NHPI
hia2400f	Hawai'i	4	Boy	1	1	2	Asian	164
hia533cb	Hawai'i	3	Boy	1	0		Asian
hia54b18	Hawai'i	4	Boy	1	1	2	Asian
hia6bc09	Hawai'i			1	0
hia77d64	Hawai'i			0	1	1
hiab92b6	Hawai'i	3	Boy	0	1	0	Asian	161
hib1cef6	Hawai'i	4	Girl	0	1	1	Black
hib28352	Hawai'i	3	Girl	1	0		Black
hib3799f	Hawai'i	3	Boy	1	1	2	NHPI	85
hib3f8f9	Hawai'i	3	Girl	1	1	1	NHPI	93
hib5230b	Hawai'i	5	Boy	1	1	1	NHPI	72
hib6203a	Hawai'i	5	Girl	1	0		Asian
hib6a717	Hawai'i	2	Boy	1	1	1	NHPI	164
hib81917	Hawai'i	2	Girl	0	0		NHPI
hibe17e1	Hawai'i	5	Boy	1	0		Asian
hibf07c9	Hawai'i	4		0	0		Asian
hic0ba87	Hawai'i	4	Girl	0	0		Asian
hic1196e	Hawai'i			0	0
hic1dffa	Hawai'i			0	0
hic215b4	Hawai'i	3	Girl	0	0		Asian
hic24a4a	Hawai'i	3	Girl	0	1	1	Asian	313
hic315a9	Hawai'i	5	Girl	0	0		NHPI
hic41c7d	Hawai'i	4	Girl	0	1	0	NHPI	132
hic6e841	Hawai'i			1	1	2
hic79cc1	Hawai'i	2	Girl	0	0		NHPI
hic9fa52	Hawai'i			0	1	1
hiccc2dc	Hawai'i	5	Girl	1	1	1	NHPI	313
hicde563	Hawai'i	5	Boy	1	0		NHPI
hicf71ea	Hawai'i			0	0
hid12822	Hawai'i	4	Boy	1	1	2	Asian	93
hid223f6	Hawai'i	3	Girl	0	1	1	NHPI
hie35de2	Hawai'i	4	Girl	0	1	1	NHPI	164
hie52d5e	Hawai'i	4	Girl	0	1	0	Asian
hie9ce49	Hawai'i	5	Boy	0	0		NHPI
hiea5088	Hawai'i	5	Boy	1	1	2
hiecabac	Hawai'i	3	Girl	1	1	1	NHPI	24
hied1588	Hawai'i	4	Girl	0	1	0	Asian
hied8f55	Hawai'i			0	0
hieecb6f	Hawai'i	4	Girl	1	1	2	NHPI	2
hieed366	Hawai'i	2	Boy	0	0		Hisp
hief35eb	Hawai'i	4	Girl	0	0		Asian
hiefd8f6	Hawai'i	3	Girl	0	1	2	Asian
hif06feb	Hawai'i	2	Girl	0	0		NHW
hif40d0d	Hawai'i	3	Boy	0	0		Asian
hifaa3bd	Hawai'i	5	Boy	1	1		Asian
hifb6579	Hawai'i	5	Girl	1	1	2	NHPI	159
hifc793c	Hawai'i	4	Boy	0	0		Asian
hiunkno2	Hawai'i				0
hiunkno4	Hawai'i				0
hiunkno6	Hawai'i				1
naz008695	Arizona	3	Boy	0	0		NHW
naz00f4be	Arizona	3	Boy	0	1	0	NHW	313
naz0192f0	Arizona	4	Boy	1	1	2	NHW	159
naz030d2b	Arizona	1	Girl	0	0		NHW
naz04edb9	Arizona	2	Girl	0	1	1	NHW	313
naz066d6b	Arizona	5	Boy	0	0		NHW
naz085e15	Arizona	5	Girl	0	0		NHW
naz08719d	Arizona	4	Boy	1	1	2	NHW	164
naz0b6b32	Arizona	4	Boy	0	1	1	AIAN
naz0c33ec	Arizona	4	Boy	0	1	1	NHW	93
naz0c5f8d	Arizona	4	Boy	0	1	0	NHW	62
naz0c669e	Arizona	3	Boy	0	0		NHW
naz0c9830	Arizona	3	Girl	0	0		AIAN
naz0dea3d	Arizona	4	Girl	0	1	1	NHW	313
naz11be86	Arizona	5	Boy	0	1		NHW
naz124e4f	Arizona	3	Girl	0	0		NHW
naz134b09	Arizona	3	Boy	0	1	0	NHW	161
naz14627f	Arizona	3	Girl	0	1	0	NHW
naz16cd37	Arizona	2	Boy	0	0		NHW
naz172d49	Arizona	1	Girl	0	1	0	NHW	62
naz17c3cf	Arizona	5	Girl	0	1	0	NHW	92
naz17fcc4	Arizona	4	Boy	0	1	1	NHW	178
naz1801ce	Arizona	1	Boy	0	0		NHW
naz1840eb	Arizona	5	Boy	0	0		NHW
naz188039	Arizona	5	Girl	0	0		Hisp
naz19a0d9	Arizona	2	Girl	0	0		AIAN
naz1a28c4	Arizona	4	Girl	0	1	2	NHW	251
naz1c324c	Arizona	4	Boy	0	0		NHW
naz1d7e8c	Arizona	3	Boy	0	1	1	Black
naz1f2226	Arizona	1	Boy	0	0		NHW
naz21717f	Arizona	1	Girl	0	1	1	NHW	164
naz22d4d2	Arizona	3	Girl	0	0		NHW
naz2386ff	Arizona	5	Girl	0	1	1	NHW	44
naz2445dc	Arizona	4	Boy	0	0		NHW
naz257bb6	Arizona	3	Boy	0	0		AIAN
naz26db69	Arizona	3	Girl	0	0		NHW
naz2882f8	Arizona	4	Girl	0	0		NHW
naz2b1eb8	Arizona	3	Boy	0	0		NHW
naz2b4bc8	Arizona	4	Girl	0	0		NHW
naz2c71ae	Arizona	3	Boy	0	0		NHW
naz2d1641	Arizona	3	Girl	0	1	1	NHW	286
naz2d9188	Arizona	3	Boy	0	0		Hisp
naz2dcee3	Arizona	4	Girl	0	1	1	NHW	286
naz2e9f7b	Arizona	5	Boy	1	1	1	NHW	93
naz2f4326	Arizona	4	Boy	0	0		NHW
naz2f48bd	Arizona	3	Boy	0	0		NHW
naz2f7e53	Arizona	1	Boy	0	0		AIAN
naz2f9ddf	Arizona	3	Boy	0	0		NHW
naz30b537	Arizona	5	Girl	0	0		AIAN
naz30db28	Arizona	1	Girl	0	0		NHW
naz319944	Arizona	4	Boy	0	0		NHW
naz32cabd	Arizona	2	Girl	0	0		NHW
naz3331da	Arizona	3	Girl	1	1	1	NHW
naz36b6df	Arizona	3	Boy	0	0		Asian
naz36f73c	Arizona	4	Girl	0	0		NHW
naz374da6	Arizona	3	Girl	0	0		AIAN
naz39b825	Arizona	3	Girl	0	0		Hisp
naz3a14ff	Arizona	3	Boy	1	1	1	AIAN	80
naz3a4076	Arizona	1	Boy	0	1	1	AIAN
naz3c0f4c	Arizona	4	Girl	0	0		NHW
naz3e077c	Arizona	3	Boy	0	0		NHW
naz3e3c57	Arizona	4	Girl	0	0		NHW
naz3f8e8b	Arizona	4	Boy	0	1	0	NHW
naz4001d5	Arizona	2	Boy	0	0		NHW
naz402162	Arizona	2	Boy	0	0		NHW
naz406c99	Arizona	4	Boy	0	1	2	NHW	159
naz449926	Arizona	3	Boy	0	0		NHW
naz44e1ec	Arizona			0	0
naz45f826	Arizona	1	Girl	0	1	0	NHW
naz466e85	Arizona	5	Boy	0	0		NHW
naz46a29f	Arizona	4	Boy	0	1	1	NHW
naz47e35e	Arizona	5	Boy	1	1	0	Hisp	92
naz492a94	Arizona	1	Boy	0	0		NHW
naz49cf62	Arizona	4	Boy	0	1	0	NHPI	80
naz4b0b87	Arizona	3	Girl	1	1	2	NHW	251
naz4b804a	Arizona	2	Boy	0	1	0	NHW
naz4cd17c	Arizona			0	0
naz4e3c6e	Arizona	3	Girl	0	1	1	NHW	62
naz4e7e40	Arizona	4	Boy	0	0		NHW
naz4ea341	Arizona	2	Boy	0	1	0	NHW	136
naz516242	Arizona	1	Boy	0	1	1	NHW	304
naz51eff0	Arizona	3	Girl	1	1	2	NHW	132
naz5257e6	Arizona	5	Girl	0	1	1	NHW	279
naz552a0c	Arizona	4	Girl	0	0		NHW
naz558ce4	Arizona	3	Boy	0	0		NHW
naz56d64c	Arizona	2	Girl	0	0		Hisp
naz593ba2	Arizona	1	Boy	0	0		NHW
naz5aed70	Arizona	1	Girl	0	0		NHW
naz5b1deb	Arizona	2	Girl	0	0		AIAN
naz5c2cea	Arizona	4	Boy	0	0		NHW
naz5c458b	Arizona	3	Girl	0	1	1	NHW
naz5c6a5c	Arizona	4	Girl	0	0		NHW
naz5d9394	Arizona	3	Girl	0	0		NHW
naz5e76c8	Arizona	3	Boy	0	1	0	NHW	136
naz5ed046	Arizona	4	Boy	0	1	1	NHW	178
naz5fbd8b	Arizona	4	Boy	0	1	1	NHW	62
naz615974	Arizona	5	Boy	0	1	0	NHW	92
naz61a3be	Arizona	4	Boy	1	0		Hisp
naz61e189	Arizona	1	Girl	0	0		NHW
naz6356e1	Arizona	4	Girl	0	1	1	AIAN	313
naz639675	Arizona	3	Boy	1	1	1	NHW	279
naz64c2cb	Arizona	3	Girl	0	1	0	NHW	136
naz6523b9	Arizona	1	Boy	0	0		NHW
naz6680b0	Arizona	2	Boy	0	0		NHW
naz66cf89	Arizona	4	Boy	0	1		Hisp
naz66d951	Arizona	2	Girl	0	1		NHW
naz671f5c	Arizona	2	Boy	0	0		NHW
naz676bcc	Arizona	2	Boy	0	0		Black
naz67ef6e	Arizona	5	Girl	0	0		AIAN
naz6828ab	Arizona	4	Boy	0	1	0	NHW
naz699df7	Arizona	3	Girl	0	1		NHW
naz6b1ef4	Arizona	4	Boy	0	0		NHW
naz6e1c42	Arizona	3	Girl	1	1	1	Hisp
naz6ec095	Arizona	4	Girl	0	0		NHW
naz701789	Arizona	4	Boy	1	1	2	AIAN
naz7018a5	Arizona	2	Boy	0	0		AIAN
naz710808	Arizona	5	Boy	0	0		NHW
naz7134a6	Arizona	3	Girl	0	0		NHW
naz7217d4	Arizona	5	Boy	0	1	1	AIAN	62
naz724e1c	Arizona	2	Girl	0	1	0	NHW	178
naz72fd2a	Arizona	3	Girl	0	0		NHW
naz732ff2	Arizona	3	Girl	0	1		NHW
naz73a141	Arizona	5	Boy	0	1	1	Asian
naz73d49a	Arizona	2	Girl	0	0		Black
naz74048e	Arizona	4	Boy	0	1	0	AIAN	161
naz74cfc5	Arizona	4	Boy	0	0		AIAN
naz751f9d	Arizona	3	Girl	0	0		AIAN
naz765f3f	Arizona	4	Girl	1	1	1	AIAN	304
naz781abb	Arizona	3	Girl	0	1	1	NHW	164
naz78cd60	Arizona	1	Boy	0	0		NHW
naz79299e	Arizona	1	Girl	0	0		Hisp
naz7d5da0	Arizona	1	Boy	0	0		NHW
naz81ebab	Arizona	1	Boy	0	1	1	NHW	93
naz83b1e0	Arizona	3	Girl	1	1	1	Hisp	2
naz859dee	Arizona	4	Boy	1	0		AIAN
naz85c0dd	Arizona	4	Boy	0	0		NHW
naz8727c0	Arizona	5	Girl	0	0		NHW
naz8b14ce	Arizona	2	Girl	0	1	1	NHW	279
naz8b1502	Arizona	4	Boy	0	0		NHW
naz8dc126	Arizona	3	Boy	0	0		NHW
naz8e3263	Arizona	3	Girl	0	0		NHW
naz90bf16	Arizona	4	Boy	0	1		AIAN
naz9103b6	Arizona	3	Boy	1	1	1	NHW	279
naz9164e6	Arizona	3	Boy	1	1	1	NHW	44
naz92500a	Arizona	1	Boy	0	0		NHW
naz9445cf	Arizona	4	Girl	1	0		AIAN
naz94aac3	Arizona	1	Girl	0	0		NHW
naz964fdc	Arizona	4	Boy	1	0		Black
naz9687e8	Arizona	4	Girl	1	1	2	Hisp
naz971441	Arizona	3	Boy	0	0		NHW
naz9b02a5	Arizona	1	Girl	0	0		NHW
naz9d0073	Arizona	4	Girl	0	1	0	NHW
naz9dabae	Arizona	5	Boy	0	0		NHW
naz9e44e5	Arizona	1	Boy	0	0		NHW
naz9f14b2	Arizona	5	Girl	0	0		NHW
naz9f6894	Arizona	4	Girl	0	0		Hisp
naza19b3b	Arizona	3	Boy	0	0		NHW
naza2038c	Arizona	3	Girl	0	0		AIAN
naza224ec	Arizona	2	Boy	0	0		AIAN
naza2917b	Arizona	5	Girl	1	1	1	NHW	304
naza3651f	Arizona	3	Boy	0	0		NHW
naza36f28	Arizona	2	Girl	0	0		Hisp
naza3b76d	Arizona	4	Boy	0	0		Hisp
naza451ef	Arizona	5	Girl	1	1	1	NHW
naza51931	Arizona	3	Boy	0	0		NHW
naza65246	Arizona	2	Girl	1	1	2	NHW	132
naza68140	Arizona	3	Boy	0	0		NHW
naza6c4c8	Arizona	5	Boy	1	0		AIAN
naza7a041	Arizona	1	Girl	0	0		NHW
naza809d2	Arizona	1	Boy	0	0		NHW
naza8e751	Arizona	2	Girl	0	0		NHW
naza97e87	Arizona	3	Girl	0	0		NHW
nazaa0604	Arizona	2	Girl	0	0		NHW
nazaa3559	Arizona	2	Boy	0	1	0	Hisp
nazaa694c	Arizona	4	Boy	1	1	2	Hisp	164
nazaf2ab8	Arizona	2	Girl	0	0		Hisp
nazaf3771	Arizona	4	Girl	0	0		Hisp
nazafdc0f	Arizona	2	Girl	0	0		NHW
nazafef3a	Arizona	4	Girl	0	1	0	NHW
nazb1ecfc	Arizona	3	Boy	1	0		NHW
nazb22dac	Arizona	3	Girl	0	0		NHW
nazb2b4a8	Arizona	1	Boy	0	1	1	NHW	164
nazb3abfa	Arizona	4	Girl	0	0		Hisp
nazb447d8	Arizona	3	Boy	0	1	0	NHW	80
nazb450af	Arizona		Girl	0	0
nazb56fc3	Arizona	4	Boy	0	0		Asian
nazb5c0e1	Arizona	5	Girl	0	0		NHW
nazb6eb79	Arizona		Boy	0	0		NHW
nazb8b3d3	Arizona	4	Girl	0	0		NHW
nazb9b070	Arizona	2	Boy	0	0		Black
nazb9cc81	Arizona	4	Boy	0	0		NHW
nazba1183	Arizona	4	Girl	0	0		NHW
nazbacadb	Arizona	3	Girl	1	1	1	Asian
nazbad20a	Arizona	4	Boy	0	1	0	NHW	44
nazbd7532	Arizona	3	Girl	0	1	1	NHW	160
nazbdecb1	Arizona	2	Girl	0	0		AIAN
nazbfb893	Arizona	4	Girl	0	0		NHW
nazbfc540	Arizona	3	Girl	0	1	0	NHW	44
nazc02060	Arizona	5	Girl	0	1	2	NHW
nazc08083	Arizona	2	Boy	1	1	1	AIAN
nazc118a8	Arizona	3	Girl	0	0		NHW
nazc26b0d	Arizona	2	Boy	0	0		NHW
nazc37403	Arizona	4	Girl	0	1	2	NHW	44
nazc422c6	Arizona	4	Boy	1	1	2	NHW	85
nazc4b624	Arizona	4	Girl	0	0		NHW
nazc53ab4	Arizona	4	Boy	0	0		NHW
nazc5b446	Arizona	2	Girl	0	1	0	Hisp
nazc8b407	Arizona	5	Girl	0	1	0	NHW	72
nazc933b9	Arizona	2	Girl	0	1		NHW
nazca8c3e	Arizona	3	Girl	1	0		AIAN
nazcbe5a6	Arizona	2	Girl	1	1	1	NHW	286
nazcdf67d	Arizona	4	Girl	0	0		NHW
nazce5db9	Arizona	2	Boy	0	0		NHW
nazcf2d6e	Arizona	5	Girl	1	0		AIAN
nazcf9396	Arizona	2	Boy	0	0		NHW
nazd22558	Arizona	2	Boy	0	1		NHW
nazd2f6a2	Arizona	4	Girl	0	0		NHW
nazd35460	Arizona	3	Boy	0	1	1	NHW
nazd5e3e0	Arizona	2	Boy	0	1	0	NHW	313
nazd728eb	Arizona	5	Girl	0	1		AIAN
nazd78476	Arizona	3	Girl	0	0		NHW
nazd7fa9d	Arizona	3	Girl	0	1	1	AIAN	279
nazd94195	Arizona	4	Boy	0	0		NHW
nazdb15dd	Arizona	1	Girl	0	0		NHW
nazdb211e	Arizona	3	Boy	0	0		NHW
nazde150a	Arizona	4	Girl	0	1	0	AIAN	44
nazde3c72	Arizona	1	Boy	0	1	1	NHW	251
nazde7c14	Arizona	4	Girl	0	1	2	NHW	85
nazdf3e75	Arizona	4	Girl	0	0		NHW
naze10a96	Arizona	2	Girl	0	1		NHW
naze18111	Arizona	1	Girl	0	1	0	NHW
naze250ff	Arizona	2	Boy	0	0		NHW
naze44946	Arizona	3	Boy	0	0		NHW
naze48874	Arizona	3	Boy	0	1		NHW
naze6013e	Arizona	3	Boy	0	1	0	NHW
naze60ebb	Arizona	3	Boy	0	1	1	AIAN	313
naze6dc75	Arizona	5	Boy	0	0		Hisp
naze7370f	Arizona	4	Boy	0	1	0	Hisp	92
naze79ea2	Arizona	4	Boy	0	0		NHW
naze9ddc8	Arizona	3	Boy	0	0		NHW
nazea4fcf	Arizona	3	Boy	1	1	2	AIAN	85
nazeb1bfe	Arizona	4	Boy	0	0		NHW
nazec397d	Arizona	4	Girl	1	1	2	Hisp	24
nazec43a4	Arizona	4	Boy	0	1	0	NHW	313
nazed5c28	Arizona	4	Girl	1	1	2	Hisp	85
nazee9f4f	Arizona	2	Girl	0	1
nazf05a01	Arizona	4	Girl	0	1	1	NHW	12
nazf0dc2e	Arizona	3	Boy	0	0		NHW
nazf16f37	Arizona	4	Boy	0	0		NHW
nazf18331	Arizona	5	Girl	0	0		NHW
nazf1cf5d	Arizona	2	Boy	0	1	0	Hisp
nazf51699	Arizona	2	Girl	0	0		NHW
nazf6bd4e	Arizona	2	Boy	0	1		NHW
nazf740e4	Arizona	3	Girl	0	0		NHW
nazf7c6fe	Arizona	4	Girl	0	1		NHW
nazf801f5	Arizona	4	Girl	0	1	0	NHW	44
nazf89720	Arizona	2	Girl	0	0		NHW
nazf94019	Arizona	2	Boy	0	0		NHW
nazf98cca	Arizona	1	Boy	0	1		NHW
nazfb757e	Arizona	5	Girl	1	0		NHW
nazfbe558	Arizona	4	Boy	0	0		NHW
nazfc6b52	Arizona	5	Boy	1	1	2	Black	251
nazfc708e	Arizona	5	Girl	0	1	1	NHW
nazfd3d67	Arizona	3	Girl	0	1	1	AIAN	279
nazfec936	Arizona	4	Boy	1	0		NHW
nazfed31b	Arizona	4	Girl	0	0		NHW
