# Supplementary material for: Strain-level genomic variation of Streptococcus mutans and early childhood caries in preschool children from Northern Arizona and Hawaii
Source: PeerJ. 2026 Feb 25;14:e20808. doi: 10.7717/peerj.20808 (PMC12949586; doi:10.7717/peerj.20808)
Supplement: Supplemental Information 8 [file peerj-14-20808-s008.xlsx]

## Sheet: TableS4
Supplemental Table 4: S. mutans core genome SNPs significantly associated with ECC identified using PySeer with lineage correction.
LocusID (accession::genome position)	Reference Genome Allele	Model Baseline Allele	Model Alternative Allele (tested)	Reference Genome Accession	Genomic position	Alternate allele frequency	filter-pvalue	LRT p-value (association)	Effect Size (β)	Standard error (β)	intercept	PC1	PC2	PC3	PC4	PC5	PC6	PC7	PC8	PC9	PC10	Lineage assignment	Annotated gene at position	Strand	Reference codon at position	Alternative codon at position	Reference Amino Acid at position	Alternate Amino Acid at position	MutationType	Annotated gene product	Locus ID	Differential Expression in Caries	Kegg Ontology Definition
NC_004350.2::4110	A	A	G	NC_004350.2	4110	0.0474	0.0169	1.81e-07	-0.316	0.0583	0.388	0.003	-0.227	-0.257	0.357	0.151	0.192	-0.113	-0.35	-0.374	-0.412	MDS4	ychF	1	AAA	AGA	K	R	non-synonymous	['redox-regulated ATPase YchF']	SMU_06	Sig. UP	ribosome-binding ATPase
NC_004350.2::5173	G	A	G	NC_004350.2	5173	0.9	5.1e-05	4.48e-07	-0.248	0.0473	0.596	-0.0533	-0.233	-0.277	0.161	0.124	0.207	-0.116	-0.14	-0.387	-0.412	MDS4	pth	1	GTC	ATC	V	I	non-synonymous	['aminoacyl-tRNA hydrolase']	SMU_07	Sig. UP	peptidyl-tRNA hydrolase, PTH1 family [EC:3.1.1.29]
NC_004350.2::91236	G	A	G	NC_004350.2	91236	0.974	6.98e-16	9.96e-08	0.406	0.0731	-0.0226	-0.00671	-0.227	-0.289	0.33	0.112	0.201	-0.0913	-0.322	-0.417	-0.406	MDS4	SMU_RS00480	1	GCT	ACT	A	T	non-synonymous	['ECF transporter S component']	SMU_86
NC_004350.2::116739	C	C	T	NC_004350.2	116739	0.137	0.00261	2.69e-10	-0.244	0.0364	0.406	-0.0338	-0.276	-0.263	0.351	0.124	0.142	-0.182	-0.349	-0.346	-0.324	MDS2	SMU_RS00610	-1	AGC	AAC	S	N	non-synonymous	['hypothetical protein']	SMU_117c
NC_004350.2::116745	G	G	T	NC_004350.2	116745	0.137	0.00261	2.69e-10	-0.244	0.0364	0.406	-0.0338	-0.276	-0.263	0.351	0.124	0.142	-0.182	-0.349	-0.346	-0.324	MDS2	SMU_RS00610	-1	ACT	AAT	T	N	non-synonymous	['hypothetical protein']	SMU_117c
NC_004350.2::176718	T	A	T	NC_004350.2	176718	0.947	2.12e-56	3.62e-08	-0.349	0.0606	0.704	-0.0505	-0.236	-0.272	0.167	0.125	0.193	-0.118	-0.13	-0.385	-0.41		SMU_RS00890	1	TCC	ACC	S	T	non-synonymous	['flavocytochrome c']	SMU_180	Sig. UP	urocanate reductase [EC:1.3.99.33]
NC_004350.2::308357	A	A	G	NC_004350.2	308357	0.0368	2.24e-55	4.82e-08	0.353	0.062	0.36	-0.0288	-0.241	-0.265	0.243	0.162	0.194	-0.106	-0.243	-0.303	-0.415		SMU_RS01600	1	TAT	TGT	Y	C	non-synonymous	['cysteine hydrolase family protein']	SMU_326
NC_004350.2::316052	A	A	G	NC_004350.2	316052	0.0526	2.12e-56	3.62e-08	0.349	0.0606	0.355	-0.0505	-0.236	-0.272	0.167	0.125	0.193	-0.118	-0.13	-0.385	-0.41		SMU_RS01640	1	ATT	GTT	I	V	non-synonymous	['argininosuccinate synthase']	SMU_334	Sig. UP	argininosuccinate synthase [EC:6.3.4.5]
NC_004350.2::347495	G	A	G	NC_004350.2	347495	0.505	0.108	5.31e-07	0.144	0.0276	0.3	0.0112	-0.233	-0.316	0.191	0.129	0.155	-0.0204	-0.297	-0.397	-0.491	MDS10	gltB	1	CGT	CAT	R	H	non-synonymous	['glutamate synthase large subunit']	SMU_365	Sig. UP	glutamate synthase (NADPH) large chain [EC:1.4.1.13]
NC_004350.2::371562	C	C	T	NC_004350.2	371562	0.0263	9.62e-55	1.48e-07	0.391	0.0715	0.363	-0.025	-0.238	-0.273	0.249	0.145	0.2	-0.12	-0.245	-0.373	-0.413		SMU_RS01930	-1	GTT	ATT	V	I	non-synonymous	['Xaa-Pro dipeptidyl-peptidase']	SMU_395	Sig. UP	X-Pro dipeptidyl-peptidase [EC:3.4.14.11]
NC_004350.2::392030	C	C	T	NC_004350.2	392030	0.0526	2.12e-56	8.61e-08	0.346	0.0619	0.355	-0.0569	-0.234	-0.272	0.165	0.118	0.193	-0.104	-0.132	-0.388	-0.411		nusA	1	GCT	GTT	A	V	non-synonymous	['transcription termination factor NusA']	SMU_418	Sig. UP	transcription termination/antitermination protein NusA
NC_004350.2::404408	G	A	G	NC_004350.2	404408	0.758	0.000547	5.26e-08	0.18	0.0317	0.237	-0.0403	-0.169	-0.329	0.302	0.152	0.158	0.0297	-0.296	-0.407	-0.39	MDS2	SMU_RS02110	1	GGT	AGT	G	S	non-synonymous	['DUF3021 domain-containing protein']	SMU_434
NC_004350.2::406073	G	A	G	NC_004350.2	406073	0.863	0.000176	6.01e-09	-0.218	0.0356	0.561	-0.0569	-0.235	-0.275	0.219	0.131	0.222	-0.123	-0.168	-0.38	-0.412	MDS1	nagA	1	GAA	AAA	E	K	non-synonymous	['N-acetylglucosamine-6-phosphate deacetylase']	SMU_435	Sig. UP	N-acetylglucosamine-6-phosphate deacetylase [EC:3.5.1.25]
NC_004350.2::459355	C	A	C	NC_004350.2	459355	0.974	9.62e-55	7.74e-07	-0.371	0.0724	0.734	-0.0318	-0.236	-0.273	0.246	0.136	0.199	-0.103	-0.246	-0.377	-0.413		SMU_RS02355	-1	GCC	TCC	A	S	non-synonymous	['glycyl-radical enzyme activating protein']	SMU_490	Sig. UP	pyruvate formate lyase activating enzyme [EC:1.97.1.4]
NC_004350.2::487081	G	A	G	NC_004350.2	487081	0.974	9.62e-55	7.74e-07	-0.371	0.0724	0.734	-0.0318	-0.236	-0.273	0.246	0.136	0.199	-0.103	-0.246	-0.377	-0.413		SMU_RS02500	1	GGA	GAA	G	E	non-synonymous	["bifunctional UDP-sugar hydrolase/5'-nucleotidase"]	SMU_520
NC_004350.2::545889	T	A	T	NC_004350.2	545889	0.874	7.76e-07	3.05e-08	0.213	0.0367	0.187	0.0391	-0.229	-0.282	0.245	0.155	0.182	-0.0412	-0.3	-0.367	-0.406	MDS1	recN	1	GAT	GAA	D	E	non-synonymous	['DNA repair protein RecN']	SMU_585	Sig. UP	DNA repair protein RecN (Recombination protein N)
NC_004350.2::605189	A	A	C	NC_004350.2	605189	0.153	0.0262	3.63e-07	-0.178	0.0337	0.4	-0.0364	-0.243	-0.248	0.311	0.166	0.245	-0.115	-0.314	-0.381	-0.39	MDS6	pepF	1	AAA	ACA	K	T	non-synonymous	['oligoendopeptidase F']	SMU_645	Sig. UP	oligoendopeptidase F [EC:3.4.24.-]
NC_004350.2::623428	G	G	T	NC_004350.2	623428	0.0421	2.94e-05	4.96e-07	-0.304	0.0583	0.386	-0.0101	-0.224	-0.254	0.322	0.143	0.194	-0.102	-0.307	-0.377	-0.41	MDS4	argJ	1	AAG	AAT	K	N	non-synonymous	['bifunctional ornithine acetyltransferase/N-acetylglutamate synthase']	SMU_664	Sig. UP	glutamate N-acetyltransferase / amino-acid N-acetyltransferase [EC:2.3.1.35 2.3.1.1]
NC_004350.2::635448	G	A	G	NC_004350.2	635448	0.942	0.000357	6.47e-07	-0.296	0.0574	0.652	-0.0436	-0.239	-0.278	0.186	0.128	0.204	-0.107	-0.151	-0.384	-0.411	MDS7	icd	1	GAT	AAT	D	N	non-synonymous	['NADP-dependent isocitrate dehydrogenase']	SMU_672	Sig. UP	isocitrate dehydrogenase [EC:1.1.1.42]
NC_004350.2::657794	A	A	T	NC_004350.2	657794	0.0263	9.62e-55	4.19e-07	0.378	0.072	0.363	-0.0311	-0.236	-0.273	0.248	0.138	0.2	-0.104	-0.246	-0.377	-0.414		pepT	1	GAA	GTA	E	V	non-synonymous	['peptidase T']	SMU_691	Sig. UP	tripeptide aminopeptidase [EC:3.4.11.4]
NC_004350.2::660889	G	A	G	NC_004350.2	660889	0.953	4.76e-56	1.33e-07	-0.337	0.0613	0.694	-0.0447	-0.236	-0.272	0.188	0.129	0.194	-0.116	-0.157	-0.383	-0.41		infC	1	GTT	ATT	V	I	non-synonymous	['translation initiation factor IF-3']	SMU_697	Sig. UP	translation initiation factor IF-3
NC_004350.2::695444	G	A	G	NC_004350.2	695444	0.811	1.25e-08	2.8e-08	0.242	0.0417	0.177	0.112	-0.249	-0.259	0.17	0.0909	0.142	-0.124	-0.375	-0.349	-0.396	MDS1	SMU_RS03475	1	AGT	AAT	S	N	non-synonymous	['DUF3114 domain-containing protein']	SMU_741
NC_004350.2::698899	A	A	G	NC_004350.2	698899	0.0737	2.58e-12	1.15e-07	-0.256	0.0463	0.392	0.0111	-0.227	-0.249	0.277	0.125	0.129	-0.128	-0.314	-0.382	-0.398	MDS1	ftsY	1	AAT	GAT	N	D	non-synonymous	['signal recognition particle-docking protein FtsY']	SMU_744	Sig. UP	fused signal recognition particle receptor
NC_004350.2::699447	A	A	G	NC_004350.2	699447	0.0263	9.62e-55	4.19e-07	0.378	0.072	0.363	-0.0311	-0.236	-0.273	0.248	0.138	0.2	-0.104	-0.246	-0.377	-0.414		SMU_RS03495	-1	ATT	ACT	I	T	non-synonymous	['DHA2 family efflux MFS transporter permease subunit']	SMU_745
NC_004350.2::699472	T	A	T	NC_004350.2	699472	0.974	9.62e-55	4.19e-07	-0.378	0.072	0.741	-0.0311	-0.236	-0.273	0.248	0.138	0.2	-0.104	-0.246	-0.377	-0.414		SMU_RS03495	-1	ACT	TCT	T	S	non-synonymous	['DHA2 family efflux MFS transporter permease subunit']	SMU_745
NC_004350.2::700461	G	A	G	NC_004350.2	700461	0.974	9.62e-55	4.19e-07	-0.378	0.072	0.741	-0.0311	-0.236	-0.273	0.248	0.138	0.2	-0.104	-0.246	-0.377	-0.414		SMU_RS03495	-1	GCT	GTT	A	V	non-synonymous	['DHA2 family efflux MFS transporter permease subunit']	SMU_745
NC_004350.2::728650	T	C	T	NC_004350.2	728650	0.942	9.18e-57	1.28e-09	-0.369	0.0577	0.721	-0.0607	-0.235	-0.271	0.151	0.12	0.194	-0.11	-0.118	-0.388	-0.412		SMU_RS03610	1	GTT	GCT	V	A	non-synonymous	['class I SAM-dependent rRNA methyltransferase']	SMU_776	Sig. UP	23S rRNA (cytosine1962-C5)-methyltransferase [EC:2.1.1.191]
NC_004350.2::730222	G	A	G	NC_004350.2	730222	0.974	9.62e-55	4.19e-07	-0.378	0.072	0.741	-0.0311	-0.236	-0.273	0.248	0.138	0.2	-0.104	-0.246	-0.377	-0.414		SMU_RS03620	1	GAT	AAT	D	N	non-synonymous	['shikimate dehydrogenase']	SMU_778	Sig. UP	shikimate dehydrogenase [EC:1.1.1.25]
NC_004350.2::731450	G	A	G	NC_004350.2	731450	0.974	9.62e-55	4.19e-07	-0.378	0.072	0.741	-0.0311	-0.236	-0.273	0.248	0.138	0.2	-0.104	-0.246	-0.377	-0.414		aroB	1	GTT	ATT	V	I	non-synonymous	['3-dehydroquinate synthase']	SMU_779	Sig. UP	3-dehydroquinate synthase [EC:4.2.3.4]
NC_004350.2::738784	G	A	G	NC_004350.2	738784	0.974	9.62e-55	4.19e-07	-0.378	0.072	0.741	-0.0311	-0.236	-0.273	0.248	0.138	0.2	-0.104	-0.246	-0.377	-0.414		rlmD	1	CGG	CAG	R	Q	non-synonymous	['23S rRNA (uracil(1939)-C(5))-methyltransferase RlmD']	SMU_788	Sig. UP	23S rRNA (uracil1939-C5)-methyltransferase [EC:2.1.1.190]
NC_004350.2::739357	C	C	T	NC_004350.2	739357	0.0316	0.0189	3.44e-07	0.349	0.0659	0.362	-0.027	-0.24	-0.282	0.251	0.138	0.219	-0.0837	-0.245	-0.376	-0.411	MDS4	rlmD	1	ACC	ATC	T	I	non-synonymous	['23S rRNA (uracil(1939)-C(5))-methyltransferase RlmD']	SMU_788	Sig. UP	23S rRNA (uracil1939-C5)-methyltransferase [EC:2.1.1.190]
NC_004350.2::788123	G	A	G	NC_004350.2	788123	0.974	9.62e-55	4.19e-07	-0.378	0.072	0.741	-0.0311	-0.236	-0.273	0.248	0.138	0.2	-0.104	-0.246	-0.377	-0.414		SMU_RS03880	1	GCT	ACT	A	T	non-synonymous	['aldo/keto reductase']	SMU_837
NC_004350.2::788903	G	A	G	NC_004350.2	788903	0.974	9.62e-55	4.19e-07	-0.378	0.072	0.741	-0.0311	-0.236	-0.273	0.248	0.138	0.2	-0.104	-0.246	-0.377	-0.414		gorA	1	GGT	AGT	G	S	non-synonymous	['glutathione-disulfide reductase']	SMU_838	Sig. UP	glutathione reductase (NADPH) [EC:1.8.1.7]
NC_004350.2::873872	C	A	C	NC_004350.2	873872	0.9	5.22e-05	5.48e-07	-0.256	0.0493	0.604	-0.058	-0.242	-0.266	0.15	0.11	0.199	-0.132	-0.132	-0.391	-0.412	MDS4	queC	-1	GGC	GTC	G	V	non-synonymous	['7-cyano-7-deazaguanine synthase QueC']	SMU_919c	Sig. UP	7-cyano-7-deazaguanine synthase [EC:6.3.4.20]
NC_004350.2::1058413	G	A	G	NC_004350.2	1058413	0.932	0.00206	9.12e-07	-0.268	0.0527	0.623	-0.0412	-0.24	-0.279	0.189	0.132	0.207	-0.119	-0.161	-0.384	-0.413	MDS7	SMU_RS05135	-1	CAT	TAT	H	Y	non-synonymous	['hypothetical protein']	SMU_1116c
NC_004350.2::1062074	C	C	T	NC_004350.2	1062074	0.0526	2.12e-56	3.62e-08	0.349	0.0606	0.355	-0.0505	-0.236	-0.272	0.167	0.125	0.193	-0.118	-0.13	-0.385	-0.41		SMU_RS05150	-1	GTG	ATG	V	M	non-synonymous	['ABC transporter permease']	SMU_1119c	Sig. UP	general nucleoside transport system permease protein
NC_004350.2::1063095	C	C	T	NC_004350.2	1063095	0.0526	2.12e-56	3.62e-08	0.349	0.0606	0.355	-0.0505	-0.236	-0.272	0.167	0.125	0.193	-0.118	-0.13	-0.385	-0.41		SMU_RS05155	-1	GAG	AAG	E	K	non-synonymous	['ABC transporter ATP-binding protein']	SMU_1120	Sig. UP	general nucleoside transport system ATP-binding protein
NC_004350.2::1085636	T	C	T	NC_004350.2	1085636	0.174	0.0297	2.89e-08	0.232	0.0399	0.333	0.0196	-0.264	-0.349	0.293	0.0835	0.0103	-0.0593	-0.242	-0.325	-0.38	MDS6	SMU_RS05275	-1	CAT	CGT	H	R	non-synonymous	['sensor histidine kinase KdpD']	SMU_1145c
NC_004350.2::1338318	G	A	G	NC_004350.2	1338318	0.921	0.000122	3.7e-08	-0.273	0.0475	0.625	-0.0378	-0.248	-0.264	0.19	0.117	0.202	-0.153	-0.164	-0.388	-0.413	MDS7	SMU_RS06415	-1	CTT	TTT	L	F	non-synonymous	['helix-turn-helix transcriptional regulator']	SMU_1409c
NC_004350.2::1375880	G	A	G	NC_004350.2	1375880	0.979	0.0132	4.95e-09	0.502	0.0816	-0.119	0.00946	-0.236	-0.277	0.353	0.144	0.197	-0.0911	-0.327	-0.375	-0.408		SMU_RS06570	-1	GCC	GTC	A	V	non-synonymous	['ABC transporter ATP-binding protein']	SMU_1445c	Sig. UP	putative tryptophan/tyrosine transport system ATP-binding protein
NC_004350.2::1388238	T	C	T	NC_004350.2	1388238	0.974	9.62e-55	7.74e-07	-0.371	0.0724	0.734	-0.0318	-0.236	-0.273	0.246	0.136	0.199	-0.103	-0.246	-0.377	-0.413		rfbB	-1	GAC	GGC	D	G	non-synonymous	['dTDP-glucose 4,6-dehydratase']	SMU_1457	Sig. UP	dTDP-glucose 4,6-dehydratase [EC:4.2.1.46]
NC_004350.2::1401635	C	C	T	NC_004350.2	1401635	0.0632	5.64e-10	5.03e-08	0.278	0.0489	0.355	-0.00239	-0.189	-0.268	0.266	0.129	0.196	-0.0864	-0.255	-0.38	-0.446		rnz	-1	GTT	ATT	V	I	non-synonymous	['ribonuclease Z']	SMU_1474c	Sig. UP	ribonuclease Z [EC:3.1.26.11]
NC_004350.2::1478734	A	A	T	NC_004350.2	1478734	0.879	0.237	6.55e-07	-0.257	0.0498	0.599	0.009	-0.266	-0.357	0.297	0.0694	0.0122	-0.043	-0.245	-0.374	-0.389	MDS6	SMU_RS07050	-1	TTT	ATT	F	I	non-synonymous	['hypothetical protein']	SMU_1554c
NC_004350.2::1547777	A	A	G	NC_004350.2	1547777	0.0842	0.00801	7.73e-07	0.216	0.0421	0.355	-0.0273	-0.213	-0.273	0.295	0.157	0.205	-0.0763	-0.243	-0.408	-0.427	MDS6	SMU_RS07355	-1	ATT	ACT	I	T	non-synonymous	['PhoH family protein']	SMU_1620	Sig. UP	phosphate starvation-inducible protein PhoH and related proteins
NC_004350.2::1587065	G	A	G	NC_004350.2	1587065	0.789	0.000182	8.97e-07	0.161	0.0316	0.246	-0.0471	-0.226	-0.292	0.309	0.161	0.133	-0.128	-0.316	-0.377	-0.327	MDS10	SMU_RS07590	-1	GCG	GTG	A	V	non-synonymous	['YlbF family regulator']	SMU_1671c
NC_004350.2::1700249	C	C	T	NC_004350.2	1700249	0.0474	4.76e-56	3.87e-07	0.331	0.0627	0.357	-0.0506	-0.234	-0.272	0.186	0.121	0.194	-0.102	-0.158	-0.386	-0.411		yqeK	-1	GCA	ACA	A	T	non-synonymous	["bis(5'-nucleosyl)-tetraphosphatase (symmetrical) YqeK"]	SMU_1798c
NC_004350.2::1729831	T	A	T	NC_004350.2	1729831	0.616	7.6e-06	1.67e-07	0.15	0.0275	0.281	-0.0594	-0.211	-0.3	0.275	0.12	0.112	-0.0388	-0.289	-0.443	-0.314	MDS6	recG	-1	GAA	GAT	E	D	non-synonymous	['ATP-dependent DNA helicase RecG']	SMU_1833	Sig. UP	ATP-dependent DNA helicase RecG [EC:3.6.4.12]
NC_004350.2::1729838	G	A	G	NC_004350.2	1729838	0.616	7.6e-06	1.67e-07	0.15	0.0275	0.281	-0.0594	-0.211	-0.3	0.275	0.12	0.112	-0.0388	-0.289	-0.443	-0.314	MDS6	recG	-1	GCT	GTT	A	V	non-synonymous	['ATP-dependent DNA helicase RecG']	SMU_1833	Sig. UP	ATP-dependent DNA helicase RecG [EC:3.6.4.12]
NC_004350.2::1852336	G	A	G	NC_004350.2	1852336	0.942	0.000357	6.47e-07	-0.296	0.0574	0.652	-0.0436	-0.239	-0.278	0.186	0.128	0.204	-0.107	-0.151	-0.384	-0.411	MDS7	SMU_RS09000	-1	GCT	GTT	A	V	non-synonymous	['class I SAM-dependent methyltransferase']	SMU_1979c	Sig. UP	site-specific DNA-methyltransferase (adenine-specific) [EC:2.1.1.72]
NC_004350.2::1879323	T	A	T	NC_004350.2	1879323	0.947	0.000572	7.9e-09	-0.309	0.051	0.666	-0.029	-0.244	-0.261	0.239	0.156	0.2	-0.108	-0.239	-0.385	-0.417	MDS5	SMU_RS09115	-1	GAT	GTT	D	V	non-synonymous	['glutamate-cysteine ligase family protein']	SMU_1999c
NC_004350.2::1884280	C	C	T	NC_004350.2	1884280	0.311	1.27e-11	1.83e-08	0.186	0.0316	0.315	0.00781	-0.168	-0.249	0.188	0.201	0.211	-0.0958	-0.199	-0.463	-0.288	MDS4	secY	-1	GGG	AGG	G	R	non-synonymous	['preprotein translocase subunit SecY']	SMU_2006	Sig. UP	preprotein translocase subunit SecY
NC_004350.2::1887977	G	A	G	NC_004350.2	1887977	0.974	9.62e-55	4.19e-07	-0.378	0.072	0.741	-0.0311	-0.236	-0.273	0.248	0.138	0.2	-0.104	-0.246	-0.377	-0.414		rpsH	-1	CTT	TTT	L	F	non-synonymous	['30S ribosomal protein S8']	SMU_2012	Sig. UP	small subunit ribosomal protein S8
NC_004350.2::1911603	G	A	G	NC_004350.2	1911603	0.979	0.0132	4.95e-09	0.502	0.0816	-0.119	0.00946	-0.236	-0.277	0.353	0.144	0.197	-0.0911	-0.327	-0.375	-0.408		treC	-1	CCC	CTC	P	L	non-synonymous	['alpha,alpha-phosphotrehalase']	SMU_2037	Sig. UP	trehalose-6-phosphate hydrolase [EC:3.2.1.93]
NC_004350.2::1968962	G	A	G	NC_004350.2	1968962	0.979	7.22e-16	4.47e-07	0.43	0.0821	-0.0483	-0.00401	-0.238	-0.277	0.333	0.138	0.194	-0.0843	-0.324	-0.377	-0.412	MDS4	argS	1	GCA	ACA	A	T	non-synonymous	['arginine--tRNA ligase']	SMU_2098	Sig. UP	arginyl-tRNA synthetase [EC:6.1.1.19]
NC_004350.2::1971018	T	C	T	NC_004350.2	1971018	0.974	9.62e-55	4.19e-07	-0.378	0.072	0.741	-0.0311	-0.236	-0.273	0.248	0.138	0.2	-0.104	-0.246	-0.377	-0.414		SMU_RS09595	-1	ATT	GTT	I	V	non-synonymous	['YitT family protein']	SMU_2099c
NC_004350.2::2007639	T	C	T	NC_004350.2	2007639	0.932	0.00605	1.92e-07	0.271	0.0499	0.121	-0.0101	-0.211	-0.283	0.348	0.151	0.155	-0.141	-0.358	-0.328	-0.418	MDS2	mnmG	-1	ATT	GTT	I	V	non-synonymous	['tRNA uridine-5-carboxymethylaminomethyl(34) synthesis enzyme MnmG']	SMU_2141
NC_004350.2::2010927	C	C	T	NC_004350.2	2010927	0.0316	4.69e-55	3.49e-08	0.378	0.0655	0.361	-0.0342	-0.236	-0.272	0.238	0.138	0.201	-0.107	-0.24	-0.376	-0.414		SMU_RS09790	-1	GCT	ACT	A	T	non-synonymous	['transglycosylase SLT domain-containing protein']	SMU_2146c
NC_004350.2::2013049	C	C	T	NC_004350.2	2013049	0.226	2.08e-07	8.09e-07	-0.162	0.0317	0.41	0.0391	-0.224	-0.263	0.23	0.0648	0.162	-0.0747	-0.323	-0.391	-0.405	MDS1	SMU_RS09800	-1	GTT	ATT	V	I	non-synonymous	['energy-coupling factor transporter transmembrane protein EcfT']	SMU_2148c	Sig. UP	energy-coupling factor transport system permease protein
NC_004350.2::2017986	A	A	G	NC_004350.2	2017986	0.8	0.113	3.25e-07	-0.215	0.0405	0.545	-0.00458	-0.293	-0.334	0.236	0.132	0.0104	-0.0367	-0.175	-0.407	-0.405	MDS6	SMU_RS09830	-1	GTA	GCA	V	A	non-synonymous	['EF-P 5-aminopentanol modification-associated protein YfmF']	SMU_2154c
NC_004350.2::2029978	G	A	G	NC_004350.2	2029978	0.974	9.62e-55	4.19e-07	-0.378	0.072	0.741	-0.0311	-0.236	-0.273	0.248	0.138	0.2	-0.104	-0.246	-0.377	-0.414		rlmH	-1	TCT	TTT	S	F	non-synonymous	['23S rRNA (pseudouridine(1915)-N(3))-methyltransferase RlmH']	SMU_2162c	Sig. UP	23S rRNA (pseudouridine1915-N3)-methyltransferase [EC:2.1.1.177]
NC_004350.2::14442	C	C	T	NC_004350.2	14442	0.268	9.56e-07	9.02e-08	-0.194	0.0348	0.425	0.0928	-0.231	-0.261	0.204	0.06	0.159	0.0159	-0.319	-0.398	-0.404	MDS1	ftsH	1	CGC	CGT	R	R	synonymous	['ATP-dependent zinc metalloprotease FtsH']	SMU_15	Sig. UP	cell division protease FtsH [EC:3.4.24.-]
NC_004350.2::23894	G	A	G	NC_004350.2	23894	0.937	0.256	3.98e-08	0.311	0.0541	0.0818	-0.0329	-0.276	-0.276	0.315	0.138	0.194	-0.0815	-0.306	-0.383	-0.551	MDS10	mreC	1	GAG	GAA	E	E	synonymous	['rod shape-determining protein MreC']	SMU_20	Sig. UP	rod shape-determining protein MreC
NC_004350.2::116738	G	A	G	NC_004350.2	116738	0.863	0.00261	2.69e-10	0.244	0.0364	0.162	-0.0338	-0.276	-0.263	0.351	0.124	0.142	-0.182	-0.349	-0.346	-0.324	MDS2	SMU_RS00610	-1	AGC	AGT	S	S	synonymous	['hypothetical protein']	SMU_117c
NC_004350.2::136168	A	A	G	NC_004350.2	136168	0.521	0.0104	1.63e-08	-0.174	0.0295	0.464	-0.102	-0.22	-0.342	0.228	0.0555	0.0937	-0.0348	-0.26	-0.384	-0.439	MDS1	SMU_RS00675	1	GCA	GCG	A	A	synonymous	['amidohydrolase']	SMU_132
NC_004350.2::165717	C	C	T	NC_004350.2	165717	0.0211	0.0132	4.95e-09	-0.502	0.0816	0.384	0.00946	-0.236	-0.277	0.353	0.144	0.197	-0.0911	-0.327	-0.375	-0.408		SMU_RS00815	-1	ACG	ACA	T	T	synonymous	['PadR family transcriptional regulator']	SMU_163c
NC_004350.2::177008	G	A	G	NC_004350.2	177008	0.942	0.000357	6.47e-07	-0.296	0.0574	0.652	-0.0436	-0.239	-0.278	0.186	0.128	0.204	-0.107	-0.151	-0.384	-0.411	MDS7	SMU_RS00890	1	AAG	AAA	K	K	synonymous	['flavocytochrome c']	SMU_180	Sig. UP	urocanate reductase [EC:1.3.99.33]
NC_004350.2::226215	G	A	G	NC_004350.2	226215	0.979	0.0794	4.41e-07	0.448	0.0855	-0.066	0.00535	-0.235	-0.277	0.352	0.143	0.196	-0.0877	-0.345	-0.374	-0.409	MDS4	SMU_RS01215	-1	GGC	GGT	G	G	synonymous	['ABC transporter permease']	SMU_237c	Sig. UP	ABC-2 type transport system permease protein
NC_004350.2::231021	T	C	T	NC_004350.2	231021	0.668	0.21	1.7e-10	0.177	0.0261	0.255	-0.0712	-0.249	-0.306	0.336	0.0549	0.164	-0.0258	-0.307	-0.341	-0.455	MDS3	SMU_RS01240	1	GAT	GAC	D	D	synonymous	['DUF2207 domain-containing protein']	SMU_243
NC_004350.2::247401	T	C	T	NC_004350.2	247401	0.953	0.00797	9.12e-07	-0.277	0.0545	0.637	-0.0231	-0.246	-0.261	0.257	0.123	0.205	-0.114	-0.252	-0.378	-0.414	MDS4	SMU_RS01305	1	GCT	GCC	A	A	synonymous	['ABC transporter permease']	SMU_257	Sig. UP	oligopeptide transport system permease protein
NC_004350.2::247932	T	C	T	NC_004350.2	247932	0.179	0.523	7.5e-07	0.21	0.041	0.335	0.00304	-0.287	-0.354	0.262	0.0785	0.0437	-0.0997	-0.223	-0.374	-0.408	MDS6	SMU_RS01310	1	CTT	CTC	L	L	synonymous	['ABC transporter ATP-binding protein']	SMU_258	Sig. UP	oligopeptide transport system ATP-binding protein
NC_004350.2::274743	G	A	G	NC_004350.2	274743	0.947	3.75e-05	2.77e-07	-0.288	0.054	0.646	-0.0408	-0.237	-0.272	0.217	0.137	0.198	-0.115	-0.222	-0.377	-0.412	MDS4	SMU_RS01435	1	AAG	AAA	K	K	synonymous	['transcription antiterminator']	SMU_289	Sig. UP	transcriptional antiterminator
NC_004350.2::284905	C	C	T	NC_004350.2	284905	0.174	4.41e-18	1.19e-07	0.275	0.0498	0.325	0.0537	-0.088	-0.254	0.279	0.131	0.208	-0.0907	-0.263	-0.37	-0.219	MDS2	polA	1	TAC	TAT	Y	Y	synonymous	['DNA polymerase I']	SMU_297	Sig. UP	DNA polymerase I [EC:2.7.7.7]
NC_004350.2::308250	C	C	T	NC_004350.2	308250	0.0526	2.12e-56	9.23e-13	0.384	0.0498	0.353	-0.0345	-0.244	-0.263	0.217	0.172	0.198	-0.125	-0.224	-0.293	-0.419	MDS7	SMU_RS01600	1	AGC	AGT	S	S	synonymous	['cysteine hydrolase family protein']	SMU_326
NC_004350.2::308370	C	C	T	NC_004350.2	308370	0.0368	2.24e-55	4.82e-08	0.353	0.062	0.36	-0.0288	-0.241	-0.265	0.243	0.162	0.194	-0.106	-0.243	-0.303	-0.415		SMU_RS01600	1	ATC	ATT	I	I	synonymous	['cysteine hydrolase family protein']	SMU_326
NC_004350.2::316000	T	C	T	NC_004350.2	316000	0.684	1.67e-11	4.09e-07	0.158	0.0301	0.265	0.0496	-0.228	-0.269	0.208	0.0534	0.18	-0.0329	-0.284	-0.309	-0.375	MDS1	SMU_RS01640	1	TTT	TTC	F	F	synonymous	['argininosuccinate synthase']	SMU_334	Sig. UP	argininosuccinate synthase [EC:6.3.4.5]
NC_004350.2::316003	T	C	T	NC_004350.2	316003	0.947	2.12e-56	3.62e-08	-0.349	0.0606	0.704	-0.0505	-0.236	-0.272	0.167	0.125	0.193	-0.118	-0.13	-0.385	-0.41		SMU_RS01640	1	ATT	ATC	I	I	synonymous	['argininosuccinate synthase']	SMU_334	Sig. UP	argininosuccinate synthase [EC:6.3.4.5]
NC_004350.2::404422	G	A	G	NC_004350.2	404422	0.753	0.000245	4.92e-08	0.179	0.0313	0.239	-0.0413	-0.168	-0.326	0.302	0.151	0.151	0.0241	-0.296	-0.408	-0.389	MDS2	SMU_RS02110	1	CTG	CTA	L	L	synonymous	['DUF3021 domain-containing protein']	SMU_434
NC_004350.2::411153	A	A	G	NC_004350.2	411153	0.0263	0.126	1.81e-08	-0.46	0.0781	0.385	0.0125	-0.236	-0.278	0.374	0.147	0.198	-0.0861	-0.37	-0.372	-0.41	MDS4	SMU_RS02125	-1	CGT	CGC	R	R	synonymous	['2-hydroxyacyl-CoA dehydratase']	SMU_438c
NC_004350.2::430013	T	C	T	NC_004350.2	430013	0.911	0.000556	5.48e-07	-0.231	0.0444	0.583	-0.0252	-0.225	-0.266	0.207	0.16	0.187	-0.119	-0.183	-0.423	-0.428	MDS7	SMU_RS02220	1	GAT	GAC	D	D	synonymous	['amino acid ABC transporter ATP-binding protein']	SMU_461	Sig. UP	polar amino acid transport system ATP-binding protein [EC:7.4.2.1]
NC_004350.2::462898	T	C	T	NC_004350.2	462898	0.847	1.49e-14	1.25e-08	-0.235	0.0393	0.572	0.0304	-0.134	-0.263	0.271	0.133	0.205	-0.109	-0.261	-0.377	-0.322	MDS2	SMU_RS02365	1	TCT	TCC	S	S	synonymous	['glycyl radical protein']	SMU_493	Sig. UP	formate C-acetyltransferase [EC:2.3.1.54]
NC_004350.2::522637	G	A	G	NC_004350.2	522637	0.937	0.00345	1.56e-07	0.264	0.0483	0.126	-0.0126	-0.231	-0.271	0.337	0.109	0.188	-0.09	-0.319	-0.344	-0.414	MDS4	ileS	1	AAG	AAA	K	K	synonymous	['isoleucine--tRNA ligase']	SMU_558	Sig. UP	isoleucyl-tRNA synthetase [EC:6.1.1.5]
NC_004350.2::533580	G	A	G	NC_004350.2	533580	0.126	0.465	4.49e-10	0.368	0.0557	0.326	0.0149	-0.303	-0.409	0.292	0.0333	-0.102	-0.0231	-0.22	-0.37	-0.402	MDS6	feoB	1	ACG	ACA	T	T	synonymous	['ferrous iron transport protein B']	SMU_570	Sig. UP	ferrous iron transport protein B
NC_004350.2::554400	T	C	T	NC_004350.2	554400	0.974	9.62e-55	4.19e-07	-0.378	0.072	0.741	-0.0311	-0.236	-0.273	0.248	0.138	0.2	-0.104	-0.246	-0.377	-0.414		SMU_RS02840	1	GTT	GTC	V	V	synonymous	['phosphoglycerate mutase']	SMU_596	Sig. UP	2,3-bisphosphoglycerate-dependent phosphoglycerate mutase [EC:5.4.2.11]
NC_004350.2::605187	A	A	G	NC_004350.2	605187	0.184	0.388	4.09e-07	-0.164	0.0312	0.403	-0.0437	-0.247	-0.258	0.306	0.158	0.233	-0.133	-0.313	-0.411	-0.43	MDS6	pepF	1	GAA	GAG	E	E	synonymous	['oligoendopeptidase F']	SMU_645	Sig. UP	oligoendopeptidase F [EC:3.4.24.-]
NC_004350.2::629530	A	A	G	NC_004350.2	629530	0.0263	6.98e-16	9.96e-08	-0.406	0.0731	0.384	-0.00671	-0.227	-0.289	0.33	0.112	0.201	-0.0913	-0.322	-0.417	-0.406	MDS4	nrdE	-1	GCT	GCC	A	A	synonymous	['class 1b ribonucleoside-diphosphate reductase subunit alpha']	SMU_668c	Sig. UP	ribonucleoside-diphosphate reductase alpha chain [EC:1.17.4.1]
NC_004350.2::629572	A	A	G	NC_004350.2	629572	0.0263	6.98e-16	9.96e-08	-0.406	0.0731	0.384	-0.00671	-0.227	-0.289	0.33	0.112	0.201	-0.0913	-0.322	-0.417	-0.406	MDS4	nrdE	-1	ATT	ATC	I	I	synonymous	['class 1b ribonucleoside-diphosphate reductase subunit alpha']	SMU_668c	Sig. UP	ribonucleoside-diphosphate reductase alpha chain [EC:1.17.4.1]
NC_004350.2::633776	C	C	T	NC_004350.2	633776	0.742	0.0505	8.86e-07	-0.153	0.0301	0.487	0.00896	-0.247	-0.319	0.316	0.0891	0.111	-0.0359	-0.236	-0.342	-0.407	MDS6	SMU_RS03180	1	CTA	TTA	L	L	synonymous	['citrate synthase']	SMU_671	Sig. UP	citrate synthase [EC:2.3.3.1]
NC_004350.2::633778	A	A	G	NC_004350.2	633778	0.742	0.0505	8.86e-07	-0.153	0.0301	0.487	0.00896	-0.247	-0.319	0.316	0.0891	0.111	-0.0359	-0.236	-0.342	-0.407	MDS6	SMU_RS03180	1	CTA	CTG	L	L	synonymous	['citrate synthase']	SMU_671	Sig. UP	citrate synthase [EC:2.3.3.1]
NC_004350.2::633781	C	C	T	NC_004350.2	633781	0.753	0.0118	1.51e-07	-0.166	0.0304	0.498	0.00901	-0.245	-0.317	0.318	0.0842	0.0932	-0.0389	-0.233	-0.339	-0.406	MDS6	SMU_RS03180	1	CAC	CAT	H	H	synonymous	['citrate synthase']	SMU_671	Sig. UP	citrate synthase [EC:2.3.3.1]
NC_004350.2::635660	C	C	T	NC_004350.2	635660	0.121	0.00195	2.63e-07	0.215	0.0402	0.347	-0.0456	-0.248	-0.271	0.185	0.122	0.214	-0.147	-0.189	-0.386	-0.417	MDS4	icd	1	GAC	GAT	D	D	synonymous	['NADP-dependent isocitrate dehydrogenase']	SMU_672	Sig. UP	isocitrate dehydrogenase [EC:1.1.1.42]
NC_004350.2::640016	A	A	G	NC_004350.2	640016	0.0947	2.1e-05	5.22e-09	0.295	0.048	0.345	-0.0599	-0.24	-0.273	0.139	0.13	0.209	-0.115	-0.11	-0.382	-0.416	MDS4	gapN	1	GAA	GAG	E	E	synonymous	['NADP-dependent glyceraldehyde-3-phosphate dehydrogenase']	SMU_676	Sig. UP	glyceraldehyde-3-phosphate dehydrogenase (NADP+) [EC:1.2.1.9]
NC_004350.2::667407	G	A	G	NC_004350.2	667407	0.779	1.01e-09	2.97e-07	0.21	0.0394	0.209	0.0859	-0.284	-0.277	0.221	0.102	0.187	-0.177	-0.169	-0.321	-0.31	MDS1	SMU_RS03345	1	CGG	CGA	R	R	synonymous	['ECF transporter S component']	SMU_709
NC_004350.2::668482	C	C	T	NC_004350.2	668482	0.632	4.31e-06	9.81e-08	-0.149	0.0268	0.467	0.00792	-0.25	-0.305	0.221	0.0934	0.14	-0.112	-0.186	-0.346	-0.354	MDS4	ppc	1	ACC	ACT	T	T	synonymous	['phosphoenolpyruvate carboxylase']	SMU_712	Sig. UP	phosphoenolpyruvate carboxylase [EC:4.1.1.31]
NC_004350.2::668929	T	C	T	NC_004350.2	668929	0.858	5.51e-06	3.24e-07	0.198	0.0373	0.203	-0.0512	-0.246	-0.272	0.299	0.0855	0.142	-0.13	-0.295	-0.422	-0.304	MDS10	ppc	1	CGT	CGC	R	R	synonymous	['phosphoenolpyruvate carboxylase']	SMU_712	Sig. UP	phosphoenolpyruvate carboxylase [EC:4.1.1.31]
NC_004350.2::700496	G	G	T	NC_004350.2	700496	0.0263	9.62e-55	4.19e-07	0.378	0.072	0.363	-0.0311	-0.236	-0.273	0.248	0.138	0.2	-0.104	-0.246	-0.377	-0.414		SMU_RS03495	-1	CTC	CTA	L	L	synonymous	['DHA2 family efflux MFS transporter permease subunit']	SMU_745
NC_004350.2::724734	G	A	G	NC_004350.2	724734	0.916	0.000159	8.96e-10	-0.267	0.0412	0.617	-0.0494	-0.241	-0.271	0.233	0.135	0.201	-0.118	-0.217	-0.375	-0.416	MDS4	SMU_RS03600	1	AAG	AAA	K	K	synonymous	['HAD family hydrolase']	SMU_774	Sig. UP	putative hydrolase of the HAD superfamily
NC_004350.2::730516	T	C	T	NC_004350.2	730516	0.974	9.62e-55	4.19e-07	-0.378	0.072	0.741	-0.0311	-0.236	-0.273	0.248	0.138	0.2	-0.104	-0.246	-0.377	-0.414		aroB	1	AGT	AGC	S	S	synonymous	['3-dehydroquinate synthase']	SMU_779	Sig. UP	3-dehydroquinate synthase [EC:4.2.3.4]
NC_004350.2::730624	T	C	T	NC_004350.2	730624	0.889	0.00182	1.28e-08	-0.249	0.0417	0.594	-0.0657	-0.243	-0.265	0.214	0.191	0.187	-0.136	-0.155	-0.468	-0.412	MDS7	aroB	1	GGT	GGC	G	G	synonymous	['3-dehydroquinate synthase']	SMU_779	Sig. UP	3-dehydroquinate synthase [EC:4.2.3.4]
NC_004350.2::758738	A	A	G	NC_004350.2	758738	0.337	0.0736	1.29e-07	-0.144	0.0261	0.421	-0.0327	-0.216	-0.308	0.314	0.113	0.145	-0.0489	-0.256	-0.351	-0.472	MDS10	SMU_RS03760	1	TTA	TTG	L	L	synonymous	['helix-turn-helix transcriptional regulator']	SMU_813
NC_004350.2::759173	G	A	G	NC_004350.2	759173	0.963	8.54e-05	8.56e-09	0.381	0.0631	0.00585	0.0358	-0.242	-0.275	0.268	0.132	0.192	-0.0824	-0.337	-0.376	-0.408	MDS1	SMU_RS03760	1	GTG	GTA	V	V	synonymous	['helix-turn-helix transcriptional regulator']	SMU_813
NC_004350.2::790800	C	C	T	NC_004350.2	790800	0.0263	9.62e-55	4.19e-07	0.378	0.072	0.363	-0.0311	-0.236	-0.273	0.248	0.138	0.2	-0.104	-0.246	-0.377	-0.414		SMU_RS03890	-1	CTG	CTA	L	L	synonymous	['folylpolyglutamate synthase/dihydrofolate synthase family protein']	SMU_839	Sig. UP	dihydrofolate synthase / folylpolyglutamate synthase [EC:6.3.2.12 6.3.2.17]
NC_004350.2::873871	G	A	G	NC_004350.2	873871	0.9	5.22e-05	2.61e-07	-0.262	0.049	0.609	-0.0587	-0.242	-0.268	0.147	0.108	0.206	-0.111	-0.126	-0.389	-0.412	MDS4	queC	-1	GGC	GGT	G	G	synonymous	['7-cyano-7-deazaguanine synthase QueC']	SMU_919c	Sig. UP	7-cyano-7-deazaguanine synthase [EC:6.3.4.20]
NC_004350.2::890826	C	C	T	NC_004350.2	890826	0.495	1.62e-09	2.42e-08	0.153	0.0262	0.297	-0.0205	-0.201	-0.215	0.281	0.109	0.257	-0.0607	-0.341	-0.4	-0.323	MDS10	fni	1	AGC	AGT	S	S	synonymous	['type 2 isopentenyl-diphosphate Delta-isomerase']	SMU_939	Sig. UP	isopentenyl-diphosphate Delta-isomerase [EC:5.3.3.2]
NC_004350.2::1053707	G	A	G	NC_004350.2	1053707	0.947	0.0227	4.96e-09	0.34	0.0554	0.0504	0.00944	-0.228	-0.26	0.376	0.153	0.217	-0.061	-0.361	-0.368	-0.411	MDS4	SMU_RS05120	-1	ACC	ACT	T	T	synonymous	['class A sortase']	SMU_1113	Sig. UP	sortase A [EC:3.4.22.70]
NC_004350.2::1063492	C	C	T	NC_004350.2	1063492	0.0526	2.12e-56	3.62e-08	0.349	0.0606	0.355	-0.0505	-0.236	-0.272	0.167	0.125	0.193	-0.118	-0.13	-0.385	-0.41		SMU_RS05155	-1	CAG	CAA	Q	Q	synonymous	['ABC transporter ATP-binding protein']	SMU_1120	Sig. UP	general nucleoside transport system ATP-binding protein
NC_004350.2::1088552	T	A	T	NC_004350.2	1088552	0.963	4.08e-05	9.1e-07	0.326	0.0641	0.059	-0.0197	-0.256	-0.273	0.318	0.146	0.203	-0.099	-0.314	-0.374	-0.348	MDS10	SMU_RS05290	1	GCT	GCA	A	A	synonymous	['ABC transporter permease']	SMU_1149	Sig. UP	lantibiotic transport system permease protein
NC_004350.2::1217188	T	C	T	NC_004350.2	1217188	0.847	3.04e-05	2.59e-07	0.361	0.0675	0.0667	0.208	-0.269	-0.27	0.081	0.11	0.176	-0.0685	-0.393	-0.375	-0.404	MDS1	SMU_RS05935	-1	TTA	TTG	L	L	synonymous	['voltage-gated chloride channel family protein']	SMU_1290c
NC_004350.2::1355513	C	C	T	NC_004350.2	1355513	0.0211	0.0132	4.95e-09	-0.502	0.0816	0.384	0.00946	-0.236	-0.277	0.353	0.144	0.197	-0.0911	-0.327	-0.375	-0.408		SMU_RS06490	-1	CAG	CAA	Q	Q	synonymous	['ATP-dependent Clp protease ATP-binding subunit']	SMU_1425	Sig. UP	ATP-dependent Clp protease ATP-binding subunit ClpB
NC_004350.2::1372446	G	A	G	NC_004350.2	1372446	0.932	8.62e-07	7.04e-07	-0.27	0.0525	0.625	-0.0399	-0.229	-0.271	0.188	0.129	0.195	-0.117	-0.158	-0.383	-0.41	MDS7	SMU_RS06555	-1	AAC	AAT	N	N	synonymous	['alpha/beta hydrolase family protein']	SMU_1443c	Sig. UP	putative tributyrin esterase [EC:3.1.1.-]
NC_004350.2::1375435	C	C	T	NC_004350.2	1375435	0.0263	0.0454	2.09e-07	-0.403	0.0746	0.384	0.0111	-0.236	-0.277	0.345	0.143	0.196	-0.0939	-0.308	-0.376	-0.408		SMU_RS06570	-1	TTG	TTA	L	L	synonymous	['ABC transporter ATP-binding protein']	SMU_1445c	Sig. UP	putative tryptophan/tyrosine transport system ATP-binding protein
NC_004350.2::1375654	G	A	G	NC_004350.2	1375654	0.979	0.0132	4.95e-09	0.502	0.0816	-0.119	0.00946	-0.236	-0.277	0.353	0.144	0.197	-0.0911	-0.327	-0.375	-0.408		SMU_RS06570	-1	GGC	GGT	G	G	synonymous	['ABC transporter ATP-binding protein']	SMU_1445c	Sig. UP	putative tryptophan/tyrosine transport system ATP-binding protein
NC_004350.2::1375851	G	A	G	NC_004350.2	1375851	0.979	0.0132	4.95e-09	0.502	0.0816	-0.119	0.00946	-0.236	-0.277	0.353	0.144	0.197	-0.0911	-0.327	-0.375	-0.408		SMU_RS06570	-1	CTA	TTA	L	L	synonymous	['ABC transporter ATP-binding protein']	SMU_1445c	Sig. UP	putative tryptophan/tyrosine transport system ATP-binding protein
NC_004350.2::1378513	C	C	T	NC_004350.2	1378513	0.0211	7.22e-16	2.43e-07	-0.439	0.0818	0.382	-0.00399	-0.24	-0.278	0.334	0.139	0.194	-0.0862	-0.325	-0.376	-0.413	MDS4	SMU_RS06585	1	GGC	GGT	G	G	synonymous	['NFACT family protein']	SMU_1449
NC_004350.2::1386839	G	A	G	NC_004350.2	1386839	0.879	0.00135	2.21e-09	0.237	0.0376	0.164	-0.0151	-0.27	-0.268	0.364	0.138	0.213	-0.104	-0.301	-0.334	-0.324	MDS4	SMU_RS06615	-1	CCC	CCT	P	P	synonymous	['8-oxo-dGTP diphosphatase']	SMU_1455	Sig. UP	8-oxo-dGTP diphosphatase [EC:3.6.1.55]
NC_004350.2::1395129	A	A	G	NC_004350.2	1395129	0.0789	1.04e-09	1.85e-07	-0.238	0.0438	0.392	-0.0314	-0.237	-0.276	0.307	0.093	0.166	-0.138	-0.303	-0.375	-0.362	MDS10	SMU_RS06660	-1	GTT	GTC	V	V	synonymous	['adenine phosphoribosyltransferase']	SMU_1467	Sig. UP	adenine phosphoribosyltransferase [EC:2.4.2.7]
NC_004350.2::1425775	C	C	T	NC_004350.2	1425775	0.0316	6.74e-16	9.58e-07	-0.356	0.0701	0.384	-0.0172	-0.262	-0.28	0.323	0.145	0.199	-0.1	-0.318	-0.373	-0.343	MDS10	rexB	-1	CTG	CTA	L	L	synonymous	['ATP-dependent nuclease subunit B']	SMU_1500	Sig. UP	ATP-dependent helicase/nuclease subunit B [EC:3.1.-.- 3.6.4.12]
NC_004350.2::1441467	G	A	G	NC_004350.2	1441467	0.963	0.0281	8.78e-07	0.332	0.0651	0.0536	0.0089	-0.233	-0.271	0.339	0.141	0.182	-0.0987	-0.345	-0.375	-0.409	MDS1	smc	-1	AGC	AGT	S	S	synonymous	['chromosome segregation protein SMC']	SMU_1513	Sig. UP	chromosome segregation protein
NC_004350.2::1540705	A	A	G	NC_004350.2	1540705	0.168	0.0626	5.05e-07	-0.216	0.0414	0.409	-0.0139	-0.294	-0.295	0.37	0.118	0.212	-0.176	-0.148	-0.367	-0.275	MDS10	SMU_RS07310	-1	TCT	TCC	S	S	synonymous	['multidrug efflux MFS transporter']	SMU_1611c
NC_004350.2::1541320	T	C	T	NC_004350.2	1541320	0.905	0.00137	1.65e-08	0.285	0.0481	0.115	-0.047	-0.3	-0.284	0.32	0.122	0.185	-0.159	-0.327	-0.338	-0.254	MDS10	SMU_RS07310	-1	TCA	TCG	S	S	synonymous	['multidrug efflux MFS transporter']	SMU_1611c
NC_004350.2::1553700	C	C	T	NC_004350.2	1553700	0.221	0.000164	5.74e-07	-0.155	0.0299	0.407	-0.0261	-0.201	-0.314	0.251	0.124	0.17	-0.0452	-0.284	-0.33	-0.423	MDS3	SMU_RS07395	1	CTA	TTA	L	L	synonymous	['DUF3397 domain-containing protein']	SMU_1628
NC_004350.2::1585584	G	A	G	NC_004350.2	1585584	0.363	1.17e-10	3.63e-07	0.162	0.0306	0.314	0.0397	-0.207	-0.291	0.259	0.0994	0.072	-0.0296	-0.196	-0.321	-0.329	MDS6	SMU_RS07580	-1	CTG	TTG	L	L	synonymous	['ABC transporter substrate-binding protein']	SMU_1669	Sig. UP	branched-chain amino acid transport system substrate-binding protein
NC_004350.2::1585747	G	A	G	NC_004350.2	1585747	0.358	1.59e-11	2.84e-07	0.166	0.0312	0.313	0.0393	-0.204	-0.285	0.259	0.0986	0.0545	-0.0445	-0.197	-0.32	-0.329	MDS6	SMU_RS07580	-1	TAC	TAT	Y	Y	synonymous	['ABC transporter substrate-binding protein']	SMU_1669	Sig. UP	branched-chain amino acid transport system substrate-binding protein
NC_004350.2::1626691	A	A	G	NC_004350.2	1626691	0.0316	4.69e-55	2.38e-07	0.36	0.067	0.362	-0.0295	-0.238	-0.273	0.234	0.141	0.198	-0.119	-0.224	-0.376	-0.412		racE	-1	GTT	GTC	V	V	synonymous	['glutamate racemase']	SMU_1718	Sig. UP	glutamate racemase [EC:5.1.1.3]
NC_004350.2::1630166	G	A	G	NC_004350.2	1630166	0.558	2.24e-05	4.27e-07	0.143	0.0273	0.293	0.0523	-0.222	-0.3	0.231	0.146	0.169	-0.0674	-0.183	-0.368	-0.408	MDS1	SMU_RS07830	-1	AGC	AGT	S	S	synonymous	['HD domain-containing protein']	SMU_1723c	Sig. UP	uncharacterized protein
NC_004350.2::1652477	C	C	T	NC_004350.2	1652477	0.0368	0.0161	6.96e-07	0.323	0.0628	0.361	-0.054	-0.231	-0.275	0.306	0.141	0.199	-0.107	-0.237	-0.378	-0.411		SMU_RS07945	-1	TTG	TTA	L	L	synonymous	['HAD family phosphatase']	SMU_1747c
NC_004350.2::1697526	A	A	G	NC_004350.2	1697526	0.379	0.611	1.46e-07	-0.156	0.0284	0.432	-0.0481	-0.316	-0.294	0.285	0.088	0.148	-0.16	-0.314	-0.351	-0.431	MDS2	SMU_RS08225	-1	AGT	AGC	S	S	synonymous	['nucleotidyltransferase']	SMU_1791c
NC_004350.2::1729840	G	A	G	NC_004350.2	1729840	0.616	7.6e-06	1.67e-07	0.15	0.0275	0.281	-0.0594	-0.211	-0.3	0.275	0.12	0.112	-0.0388	-0.289	-0.443	-0.314	MDS6	recG	-1	TCC	TCT	S	S	synonymous	['ATP-dependent DNA helicase RecG']	SMU_1833	Sig. UP	ATP-dependent DNA helicase RecG [EC:3.6.4.12]
NC_004350.2::1729897	C	A	C	NC_004350.2	1729897	0.516	1.79e-05	7.37e-11	0.167	0.0241	0.287	-0.0414	-0.248	-0.285	0.32	0.0943	0.117	-0.0815	-0.156	-0.281	-0.412	MDS8	recG	-1	CCG	CCT	P	P	synonymous	['ATP-dependent DNA helicase RecG']	SMU_1833	Sig. UP	ATP-dependent DNA helicase RecG [EC:3.6.4.12]
NC_004350.2::1731053	C	C	T	NC_004350.2	1731053	0.774	1.29e-06	5.07e-07	-0.152	0.0291	0.49	0.00594	-0.204	-0.276	0.243	0.128	0.177	-0.114	-0.217	-0.348	-0.417	MDS2	alr	-1	GAG	GAA	E	E	synonymous	['alanine racemase']	SMU_1834	Sig. UP	alanine racemase [EC:5.1.1.1]
NC_004350.2::1735628	A	A	G	NC_004350.2	1735628	0.289	0.339	2e-07	-0.154	0.0285	0.418	-0.0199	-0.244	-0.311	0.311	0.0881	0.178	-0.0605	-0.266	-0.446	-0.518	MDS10	secA	-1	CGT	CGC	R	R	synonymous	['preprotein translocase subunit SecA']	SMU_1838	Sig. UP	preprotein translocase subunit SecA [EC:7.4.2.8]
NC_004350.2::1738601	T	C	T	NC_004350.2	1738601	0.937	9.76e-05	2.17e-08	-0.319	0.0545	0.672	-0.0474	-0.239	-0.277	0.171	0.129	0.206	-0.112	-0.137	-0.383	-0.412	MDS7	scrK	-1	GGA	GGG	G	G	synonymous	['fructokinase ScrK']	SMU_1840	Sig. UP	fructokinase [EC:2.7.1.4]
NC_004350.2::1770912	T	C	T	NC_004350.2	1770912	0.968	4.69e-55	2.19e-07	-0.36	0.0669	0.722	-0.0303	-0.237	-0.273	0.235	0.14	0.199	-0.116	-0.225	-0.376	-0.412	MDS6	SMU_RS08590	1	GCT	GCC	A	A	synonymous	['PTS sugar transporter subunit IIB']	SMU_1877	Sig. UP	mannose PTS system EIIAB component [EC:2.7.1.191]
NC_004350.2::1825606	C	C	T	NC_004350.2	1825606	0.468	1.67e-05	7.05e-07	-0.136	0.0264	0.437	0.0341	-0.241	-0.288	0.233	0.161	0.126	-0.149	-0.246	-0.356	-0.373	MDS1	SMU_RS08840	1	GCC	GCT	A	A	synonymous	['polyphosphate polymerase domain-containing protein']	SMU_1945
NC_004350.2::1862322	G	A	G	NC_004350.2	1862322	0.826	1.77e-07	5.55e-07	0.267	0.0515	0.152	0.136	-0.246	-0.265	0.133	0.0824	0.155	-0.109	-0.382	-0.346	-0.405	MDS5	rpoB	-1	TCC	TCT	S	S	synonymous	['DNA-directed RNA polymerase subunit beta']	SMU_1990	Sig. UP	DNA-directed RNA polymerase subunit beta [EC:2.7.7.6]
NC_004350.2::1883738	A	A	G	NC_004350.2	1883738	0.0632	9.76e-05	2.17e-08	0.319	0.0545	0.353	-0.0474	-0.239	-0.277	0.171	0.129	0.206	-0.112	-0.137	-0.383	-0.412	MDS7	secY	-1	ATT	ATC	I	I	synonymous	['preprotein translocase subunit SecY']	SMU_2006	Sig. UP	preprotein translocase subunit SecY
NC_004350.2::1884454	G	A	G	NC_004350.2	1884454	0.847	0.000118	1.45e-07	-0.181	0.0331	0.527	-0.0184	-0.209	-0.269	0.229	0.158	0.205	-0.0989	-0.253	-0.403	-0.443	MDS4	secY	-1	CTA	TTA	L	L	synonymous	['preprotein translocase subunit SecY']	SMU_2006	Sig. UP	preprotein translocase subunit SecY
NC_004350.2::1986630	C	C	T	NC_004350.2	1986630	0.858	0.567	9.09e-07	-0.242	0.0476	0.581	0.019	-0.255	-0.361	0.296	0.0666	0.00834	-0.0639	-0.248	-0.381	-0.441	MDS6	SMU_RS09675	1	GGC	GGT	G	G	synonymous	['betaine/proline/choline family ABC transporter ATP-binding protein']	SMU_2116		osmoprotectant transport system ATP-binding protein [EC:7.6.2.9]
NC_004350.2::1995065	T	G	T	NC_004350.2	1995065	0.358	0.000602	6.11e-07	0.174	0.0337	0.311	0.0177	-0.178	-0.326	0.221	0.0513	0.0639	0.01	-0.32	-0.374	-0.482	MDS6	ilvD	1	GGT	GGG	G	G	synonymous	['dihydroxy-acid dehydratase']	SMU_2128	Sig. UP	dihydroxy-acid dehydratase [EC:4.2.1.9]
NC_004350.2::1995131	T	C	T	NC_004350.2	1995131	0.658	8.36e-12	7.5e-08	0.17	0.0302	0.261	0.0654	-0.219	-0.236	0.207	0.119	0.11	-0.0609	-0.32	-0.382	-0.385	MDS6	ilvD	1	CTT	CTC	L	L	synonymous	['dihydroxy-acid dehydratase']	SMU_2128	Sig. UP	dihydroxy-acid dehydratase [EC:4.2.1.9]
NC_004350.2::2004044	C	C	T	NC_004350.2	2004044	0.0421	4.92e-05	3.18e-07	-0.309	0.0581	0.386	-0.00815	-0.225	-0.279	0.324	0.103	0.202	-0.0944	-0.302	-0.341	-0.405	MDS4	rplI	-1	ACG	ACA	T	T	synonymous	['50S ribosomal protein L9']	SMU_2139c	Sig. UP	large subunit ribosomal protein L9
NC_004350.2::2004152	T	C	T	NC_004350.2	2004152	0.589	3.82e-09	2.88e-10	0.202	0.0302	0.254	0.118	-0.206	-0.272	0.266	0.0403	0.126	-0.0788	-0.179	-0.328	-0.401	MDS1	rplI	-1	AAA	AAG	K	K	synonymous	['50S ribosomal protein L9']	SMU_2139c	Sig. UP	large subunit ribosomal protein L9
NC_004350.2::2018342	G	A	G	NC_004350.2	2018342	0.974	0.126	1.81e-08	0.46	0.0781	-0.0753	0.0125	-0.236	-0.278	0.374	0.147	0.198	-0.0861	-0.37	-0.372	-0.41	MDS4	SMU_RS09830	-1	TTC	TTT	F	F	synonymous	['EF-P 5-aminopentanol modification-associated protein YfmF']	SMU_2154c
NC_004350.2::2022118	G	A	G	NC_004350.2	2022118	0.816	2.4e-10	3.25e-07	0.188	0.0355	0.219	0.0569	-0.228	-0.252	0.298	0.114	0.157	-0.0825	-0.152	-0.351	-0.408	MDS1	guaB	-1	ACC	ACT	T	T	synonymous	['IMP dehydrogenase']	SMU_2157	Sig. UP	IMP dehydrogenase [EC:1.1.1.205]
NC_004350.2::4596	C	C	T	NC_004350.2	4596	0.0474	0.0169	1.81e-07	-0.316	0.0583	0.388	0.003	-0.227	-0.257	0.357	0.151	0.192	-0.113	-0.35	-0.374	-0.412	MDS4	Position not in a coding region
NC_004350.2::29576	G	A	G	NC_004350.2	29576	0.758	0.00309	9.58e-09	0.17	0.0282	0.244	-0.0553	-0.212	-0.309	0.304	0.15	0.137	-0.0433	-0.263	-0.347	-0.43	MDS3	Position not in a coding region
NC_004350.2::29605	G	A	G	NC_004350.2	29605	0.768	0.00409	4.98e-08	0.164	0.0288	0.247	-0.052	-0.212	-0.305	0.304	0.15	0.14	-0.0454	-0.263	-0.347	-0.428	MDS3	Position not in a coding region
NC_004350.2::156180	G	A	G	NC_004350.2	156180	0.947	2.12e-56	3.62e-08	-0.349	0.0606	0.704	-0.0505	-0.236	-0.272	0.167	0.125	0.193	-0.118	-0.13	-0.385	-0.41		Position not in a coding region
NC_004350.2::277663	C	C	G	NC_004350.2	277663	0.0474	0.0177	3.97e-08	-0.321	0.056	0.388	0.00566	-0.228	-0.283	0.354	0.121	0.2	-0.0769	-0.313	-0.406	-0.407	MDS4	Position not in a coding region
NC_004350.2::280188	C	A	C	NC_004350.2	280188	0.921	2.44e-08	6.07e-07	-0.278	0.0538	0.629	-0.0687	-0.233	-0.272	0.152	0.114	0.192	-0.0943	-0.166	-0.387	-0.411		Position not in a coding region
NC_004350.2::340163	C	C	T	NC_004350.2	340163	0.0526	0.00168	3.64e-08	-0.3	0.0521	0.389	-0.0024	-0.228	-0.276	0.337	0.12	0.172	-0.125	-0.303	-0.41	-0.413	MDS4	Position not in a coding region
NC_004350.2::389450	G	A	G	NC_004350.2	389450	0.921	0.000358	2.85e-07	0.256	0.0481	0.137	-0.00527	-0.215	-0.281	0.353	0.0663	0.179	-0.152	-0.343	-0.296	-0.411	MDS4	Position not in a coding region
NC_004350.2::463953	A	A	G	NC_004350.2	463953	0.274	7.4e-07	4.51e-07	0.178	0.0341	0.324	0.0442	-0.136	-0.259	0.262	0.11	0.22	-0.162	-0.257	-0.395	-0.415	MDS2	Position not in a coding region
NC_004350.2::586252	C	C	T	NC_004350.2	586252	0.126	0.0817	4.02e-07	0.188	0.0358	0.349	0.00334	-0.228	-0.284	0.266	0.136	0.251	-0.0984	-0.256	-0.376	-0.44	MDS6	Position not in a coding region
NC_004350.2::596149	A	A	G	NC_004350.2	596149	0.121	3.84e-07	5.14e-07	-0.3	0.0575	0.409	0.131	-0.257	-0.272	0.136	0.115	0.18	-0.0755	-0.351	-0.377	-0.404	MDS2	Position not in a coding region
NC_004350.2::622985	G	A	G	NC_004350.2	622985	0.516	0.000111	2.59e-08	0.156	0.0268	0.292	0.0328	-0.278	-0.301	0.225	0.115	0.14	-0.12	-0.283	-0.309	-0.322	MDS2	Position not in a coding region
NC_004350.2::1130545	C	C	G	NC_004350.2	1130545	0.621	1.12e-07	7.13e-07	0.15	0.0291	0.28	0.0244	-0.185	-0.264	0.205	0.151	0.284	-0.0753	-0.308	-0.353	-0.415	MDS4	Position not in a coding region
NC_004350.2::1130556	C	C	T	NC_004350.2	1130556	0.526	5.07e-10	8.78e-09	0.169	0.0279	0.284	0.0263	-0.164	-0.254	0.218	0.105	0.296	-0.0553	-0.288	-0.287	-0.411	MDS2	Position not in a coding region
NC_004350.2::1140747	G	A	G	NC_004350.2	1140747	0.721	1.82e-07	1.94e-08	-0.199	0.0337	0.516	0.0381	-0.126	-0.264	0.222	0.113	0.205	-0.148	-0.193	-0.392	-0.471	MDS2	Position not in a coding region
NC_004350.2::1371383	T	A	T	NC_004350.2	1371383	0.858	0.000138	5.26e-09	-0.234	0.0381	0.574	-0.042	-0.214	-0.279	0.161	0.127	0.212	-0.136	-0.155	-0.39	-0.467	MDS4	Position not in a coding region
NC_004350.2::1429991	C	A	C	NC_004350.2	1429991	0.974	0.126	1.81e-08	0.46	0.0781	-0.0753	0.0125	-0.236	-0.278	0.374	0.147	0.198	-0.0861	-0.37	-0.372	-0.41	MDS4	Position not in a coding region
NC_004350.2::1824586	A	A	G	NC_004350.2	1824586	0.142	1.92e-06	8.32e-07	-0.372	0.0728	0.426	0.197	-0.266	-0.265	0.0479	0.101	0.171	-0.0315	-0.383	-0.372	-0.403	MDS1	Position not in a coding region
NC_004350.2::1849932	G	A	G	NC_004350.2	1849932	0.947	2.12e-56	3.62e-08	-0.349	0.0606	0.704	-0.0505	-0.236	-0.272	0.167	0.125	0.193	-0.118	-0.13	-0.385	-0.41		Position not in a coding region
NC_004350.2::1850183	G	A	G	NC_004350.2	1850183	0.947	2.12e-56	3.62e-08	-0.349	0.0606	0.704	-0.0505	-0.236	-0.272	0.167	0.125	0.193	-0.118	-0.13	-0.385	-0.41		Position not in a coding region
NC_004350.2::1951011	A	A	T	NC_004350.2	1951011	0.0684	5.11e-05	4.61e-07	0.246	0.047	0.356	-0.0153	-0.24	-0.243	0.262	0.0828	0.206	-0.105	-0.247	-0.392	-0.425	MDS1	Position not in a coding region
NC_004350.2::1955929	G	A	G	NC_004350.2	1955929	0.968	0.000357	9.07e-07	0.343	0.0674	0.0407	-0.0114	-0.224	-0.279	0.323	0.114	0.179	-0.112	-0.317	-0.412	-0.409	MDS4	Position not in a coding region
