# Supplementary material for: Strain-level genomic variation of Streptococcus mutans and early childhood caries in preschool children from Northern Arizona and Hawaii
Source: PeerJ. 2026 Feb 25;14:e20808. doi: 10.7717/peerj.20808 (PMC12949586; doi:10.7717/peerj.20808)
Supplement: Supplemental Information 9 [file peerj-14-20808-s009.xlsx]

## Sheet: TableS5
Supplemental Table 5: Individual SRA accession numbers and metadata for sequencing data submitted as part of this project.
Run	Assay Type	AvgSpotLen	Bases	BioProject	BioSample	BioSampleModel	Bytes	Center Name	Collection_Date	Experiment	geo_loc_name_country	geo_loc_name_country_continent	geo_loc_name	HOST	Instrument	isolate	isolation_source	LibraryLayout	LibrarySelection	LibrarySource	Organism	Platform	ReleaseDate	create_date	version	Sample Name	sample_type	SRA Study	Campaign
SRR32408420	AMPLICON	302	52061478	PRJNA1225904	SAMN46908885	Microbe\, viral or environmental	34192136	NORTHERN ARIZONA UNIVERSITY	2017/2019	SRX27738926	USA	North America	USA: Hawaii	Homo sapiens	Illumina MiSeq	hi06454b_1	saliva	PAIRED	PCR	GENOMIC	Streptococcus mutans	ILLUMINA	2025-02-20T00:00:00Z	2025-02-20T03:39:00Z	1	c4b763b4_1	Swab collection media	SRP565161	1
SRR32408453	AMPLICON	302	5828298	PRJNA1225904	SAMN46908886	Microbe\, viral or environmental	2062374	NORTHERN ARIZONA UNIVERSITY	2017/2019	SRX27738893	USA	North America	USA: Hawaii	Homo sapiens	Illumina MiSeq	hi06b98b_1	saliva	PAIRED	PCR	GENOMIC	Streptococcus mutans	ILLUMINA	2025-02-20T00:00:00Z	2025-02-20T03:39:00Z	1	c9a46959_1	Swab collection media	SRP565161	1
SRR32408487	AMPLICON	302	3679568	PRJNA1225904	SAMN46908887	Microbe\, viral or environmental	2316856	NORTHERN ARIZONA UNIVERSITY	2017/2019	SRX27738859	USA	North America	USA: Hawaii	Homo sapiens	Illumina MiSeq	hi06b98b_2	saliva	PAIRED	PCR	GENOMIC	Streptococcus mutans	ILLUMINA	2025-02-20T00:00:00Z	2025-02-20T03:40:00Z	1	c9a46959_2	Swab collection media	SRP565161	2
SRR32408528	AMPLICON	302	70673436	PRJNA1225904	SAMN46908849	Microbe\, viral or environmental	45987783	NORTHERN ARIZONA UNIVERSITY	2017/2019	SRX27738818	USA	North America	USA: Hawaii	Homo sapiens	Illumina MiSeq	hi0c8a43_1	saliva	PAIRED	PCR	GENOMIC	Streptococcus mutans	ILLUMINA	2025-02-20T00:00:00Z	2025-02-20T03:41:00Z	1	4e2851d1_1	Swab collection media	SRP565161	1
SRR32408493	AMPLICON	302	513331446	PRJNA1225904	SAMN46908895	Microbe\, viral or environmental	177003698	NORTHERN ARIZONA UNIVERSITY	2017/2019	SRX27738853	USA	North America	USA: Hawaii	Homo sapiens	Illumina MiSeq	hi215ff7_2	saliva	PAIRED	PCR	GENOMIC	Streptococcus mutans	ILLUMINA	2025-02-20T00:00:00Z	2025-02-20T03:40:00Z	1	e92118ce_2	Swab collection media	SRP565161	2
SRR32408467	AMPLICON	502	4922110	PRJNA1225904	SAMN46908844	Microbe\, viral or environmental	3179665	NORTHERN ARIZONA UNIVERSITY	2017/2019	SRX27738880	USA	North America	USA: Hawaii	Homo sapiens	Illumina MiSeq	hi242a18_2	saliva	PAIRED	PCR	GENOMIC	Streptococcus mutans	ILLUMINA	2025-02-20T00:00:00Z	2025-02-20T03:40:00Z	1	3f24fc87_2	Swab collection media	SRP565161	2
SRR32408519	AMPLICON	302	8447242	PRJNA1225904	SAMN46908893	Microbe\, viral or environmental	5566837	NORTHERN ARIZONA UNIVERSITY	2017/2019	SRX27738827	USA	North America	USA: Hawaii	Homo sapiens	Illumina MiSeq	hi255952_1	saliva	PAIRED	PCR	GENOMIC	Streptococcus mutans	ILLUMINA	2025-02-20T00:00:00Z	2025-02-20T03:40:00Z	1	e75c00c5_1	Swab collection media	SRP565161	1
SRR32408522	AMPLICON	302	1274440	PRJNA1225904	SAMN46908894	Microbe\, viral or environmental	839181	NORTHERN ARIZONA UNIVERSITY	2017/2019	SRX27738824	USA	North America	USA: Hawaii	Homo sapiens	Illumina MiSeq	hi255952_2	saliva	PAIRED	PCR	GENOMIC	Streptococcus mutans	ILLUMINA	2025-02-20T00:00:00Z	2025-02-20T03:40:00Z	1	e75c00c5_2	Swab collection media	SRP565161	2
SRR32408552	AMPLICON	502	2523554	PRJNA1225904	SAMN46908871	Microbe\, viral or environmental	1701932	NORTHERN ARIZONA UNIVERSITY	2017/2019	SRX27738794	USA	North America	USA: Hawaii	Homo sapiens	Illumina MiSeq	hi2afd2d_1	saliva	PAIRED	PCR	GENOMIC	Streptococcus mutans	ILLUMINA	2025-02-20T00:00:00Z	2025-02-20T03:40:00Z	1	828a9eab_1	Swab collection media	SRP565161	1
SRR32408474	AMPLICON	302	4831094	PRJNA1225904	SAMN46908852	Microbe\, viral or environmental	1736016	NORTHERN ARIZONA UNIVERSITY	2017/2019	SRX27738873	USA	North America	USA: Hawaii	Homo sapiens	Illumina MiSeq	hi370fd5_1	saliva	PAIRED	PCR	GENOMIC	Streptococcus mutans	ILLUMINA	2025-02-20T00:00:00Z	2025-02-20T03:40:00Z	1	502c20b9_1	Swab collection media	SRP565161	1
SRR32408490	AMPLICON	302	5158462	PRJNA1225904	SAMN46908853	Microbe\, viral or environmental	3275699	NORTHERN ARIZONA UNIVERSITY	2017/2019	SRX27738856	USA	North America	USA: Hawaii	Homo sapiens	Illumina MiSeq	hi370fd5_2	saliva	PAIRED	PCR	GENOMIC	Streptococcus mutans	ILLUMINA	2025-02-20T00:00:00Z	2025-02-20T03:40:00Z	1	502c20b9_2	Swab collection media	SRP565161	2
SRR32408515	AMPLICON	502	1257008	PRJNA1225904	SAMN46908854	Microbe\, viral or environmental	883432	NORTHERN ARIZONA UNIVERSITY	2017/2019	SRX27738831	USA	North America	USA: Hawaii	Homo sapiens	Illumina MiSeq	hi370fd5_3	saliva	PAIRED	PCR	GENOMIC	Streptococcus mutans	ILLUMINA	2025-02-20T00:00:00Z	2025-02-20T03:40:00Z	1	502c20b9_3	Swab collection media	SRP565161	3
SRR32408512	AMPLICON	302	3782852	PRJNA1225904	SAMN46908862	Microbe\, viral or environmental	2354959	NORTHERN ARIZONA UNIVERSITY	2017/2019	SRX27738834	USA	North America	USA: Hawaii	Homo sapiens	Illumina MiSeq	hi38435d_2	saliva	PAIRED	PCR	GENOMIC	Streptococcus mutans	ILLUMINA	2025-02-20T00:00:00Z	2025-02-20T03:40:00Z	1	70bcb6fe_2	Swab collection media	SRP565161	2
SRR32408387	AMPLICON	302	1686066	PRJNA1225904	SAMN46908865	Microbe\, viral or environmental	646489	NORTHERN ARIZONA UNIVERSITY	2017/2019	SRX27738959	USA	North America	USA: Hawaii	Homo sapiens	Illumina MiSeq	hi3a36f7_1	saliva	PAIRED	PCR	GENOMIC	Streptococcus mutans	ILLUMINA	2025-02-20T00:00:00Z	2025-02-20T03:39:00Z	1	7d93d48e_1	Swab collection media	SRP565161	1
SRR32408547	AMPLICON	502	3115914	PRJNA1225904	SAMN46908866	Microbe\, viral or environmental	1933280	NORTHERN ARIZONA UNIVERSITY	2017/2019	SRX27738799	USA	North America	USA: Hawaii	Homo sapiens	Illumina MiSeq	hi3a36f7_2	saliva	PAIRED	PCR	GENOMIC	Streptococcus mutans	ILLUMINA	2025-02-20T00:00:00Z	2025-02-20T03:40:00Z	1	7d93d48e_2	Swab collection media	SRP565161	2
SRR32408394	AMPLICON	302	2961714	PRJNA1225904	SAMN46908879	Microbe\, viral or environmental	2053784	NORTHERN ARIZONA UNIVERSITY	2017/2019	SRX27738952	USA	North America	USA: Hawaii	Homo sapiens	Illumina MiSeq	hi3b5d98_2	saliva	PAIRED	PCR	GENOMIC	Streptococcus mutans	ILLUMINA	2025-02-20T00:00:00Z	2025-02-20T03:39:00Z	1	94f8c68e_2	Swab collection media	SRP565161	2
SRR32408465	AMPLICON	302	4910218	PRJNA1225904	SAMN46908878	Microbe\, viral or environmental	3361654	NORTHERN ARIZONA UNIVERSITY	2017/2019	SRX27738882	USA	North America	USA: Hawaii	Homo sapiens	Illumina MiSeq	hi3ddc14_A	saliva	PAIRED	PCR	GENOMIC	Streptococcus mutans	ILLUMINA	2025-02-20T00:00:00Z	2025-02-20T03:40:00Z	1	939e1c65_A	Swab collection media	SRP565161	A
SRR32408485	AMPLICON	502	2093842	PRJNA1225904	SAMN46908890	Microbe\, viral or environmental	1322100	NORTHERN ARIZONA UNIVERSITY	2017/2019	SRX27738861	USA	North America	USA: Hawaii	Homo sapiens	Illumina MiSeq	hi444251_1	saliva	PAIRED	PCR	GENOMIC	Streptococcus mutans	ILLUMINA	2025-02-20T00:00:00Z	2025-02-20T03:40:00Z	1	e273b4a4_1	Swab collection media	SRP565161	1
SRR32408507	AMPLICON	302	34366694	PRJNA1225904	SAMN46908848	Microbe\, viral or environmental	20220344	NORTHERN ARIZONA UNIVERSITY	2017/2019	SRX27738839	USA	North America	USA: Hawaii	Homo sapiens	Illumina MiSeq	hi45f714_1	saliva	PAIRED	PCR	GENOMIC	Streptococcus mutans	ILLUMINA	2025-02-20T00:00:00Z	2025-02-20T03:40:00Z	1	4cep7c67_1	Swab collection media	SRP565161	1
SRR32408511	AMPLICON	302	11502274	PRJNA1225904	SAMN46908842	Microbe\, viral or environmental	6723330	NORTHERN ARIZONA UNIVERSITY	2017/2019	SRX27738835	USA	North America	USA: Hawaii	Homo sapiens	Illumina MiSeq	hi4a3d26_1	saliva	PAIRED	PCR	GENOMIC	Streptococcus mutans	ILLUMINA	2025-02-20T00:00:00Z	2025-02-20T03:40:00Z	1	20dae0b6_1	Swab collection media	SRP565161	1
SRR32408477	AMPLICON	302	4228302	PRJNA1225904	SAMN46908843	Microbe\, viral or environmental	1526526	NORTHERN ARIZONA UNIVERSITY	2017/2019	SRX27738870	USA	North America	USA: Hawaii	Homo sapiens	Illumina MiSeq	hi4a3d26_2	saliva	PAIRED	PCR	GENOMIC	Streptococcus mutans	ILLUMINA	2025-02-20T00:00:00Z	2025-02-20T03:40:00Z	1	20dae0b6_2	Swab collection media	SRP565161	2
SRR32408471	AMPLICON	302	3591384	PRJNA1225904	SAMN46908869	Microbe\, viral or environmental	2356642	NORTHERN ARIZONA UNIVERSITY	2017/2019	SRX27738876	USA	North America	USA: Hawaii	Homo sapiens	Illumina MiSeq	hi4c6df5_1	saliva	PAIRED	PCR	GENOMIC	Streptococcus mutans	ILLUMINA	2025-02-20T00:00:00Z	2025-02-20T03:39:00Z	1	827e316c_1	Swab collection media	SRP565161	1
SRR32408558	AMPLICON	302	2839102	PRJNA1225904	SAMN46908870	Microbe\, viral or environmental	1745039	NORTHERN ARIZONA UNIVERSITY	2017/2019	SRX27738788	USA	North America	USA: Hawaii	Homo sapiens	Illumina MiSeq	hi4c6df5_2	saliva	PAIRED	PCR	GENOMIC	Streptococcus mutans	ILLUMINA	2025-02-20T00:00:00Z	2025-02-20T03:40:00Z	1	827e316c_2	Swab collection media	SRP565161	2
SRR32408430	AMPLICON	302	1892936	PRJNA1225904	SAMN46908857	Microbe\, viral or environmental	1339283	NORTHERN ARIZONA UNIVERSITY	2017/2019	SRX27738916	USA	North America	USA: Hawaii	Homo sapiens	Illumina MiSeq	hi528bd9_2	saliva	PAIRED	PCR	GENOMIC	Streptococcus mutans	ILLUMINA	2025-02-20T00:00:00Z	2025-02-20T03:39:00Z	1	5e123abd_2	Swab collection media	SRP565161	2
SRR32408541	AMPLICON	302	33077758	PRJNA1225904	SAMN46908847	Microbe\, viral or environmental	19812975	NORTHERN ARIZONA UNIVERSITY	2017/2019	SRX27738805	USA	North America	USA: Hawaii	Homo sapiens	Illumina MiSeq	hi564d63_1	saliva	PAIRED	PCR	GENOMIC	Streptococcus mutans	ILLUMINA	2025-02-20T00:00:00Z	2025-02-20T03:40:00Z	1	45667607_1	Swab collection media	SRP565161	1
SRR32408439	AMPLICON	302	8882424	PRJNA1225904	SAMN46908896	Microbe\, viral or environmental	3215791	NORTHERN ARIZONA UNIVERSITY	2017/2019	SRX27738907	USA	North America	USA: Hawaii	Homo sapiens	Illumina MiSeq	hi59472d_1	saliva	PAIRED	PCR	GENOMIC	Streptococcus mutans	ILLUMINA	2025-02-20T00:00:00Z	2025-02-20T03:39:00Z	1	f44dd0be_1	Swab collection media	SRP565161	1
SRR32408503	AMPLICON	302	6824596	PRJNA1225904	SAMN46908897	Microbe\, viral or environmental	2432880	NORTHERN ARIZONA UNIVERSITY	2017/2019	SRX27738843	USA	North America	USA: Hawaii	Homo sapiens	Illumina MiSeq	hi59472d_2	saliva	PAIRED	PCR	GENOMIC	Streptococcus mutans	ILLUMINA	2025-02-20T00:00:00Z	2025-02-20T03:40:00Z	1	f44dd0be_2	Swab collection media	SRP565161	2
SRR32408402	AMPLICON	302	2569718	PRJNA1225904	SAMN46908840	Microbe\, viral or environmental	976286	NORTHERN ARIZONA UNIVERSITY	2017/2019	SRX27738944	USA	North America	USA: Hawaii	Homo sapiens	Illumina MiSeq	hi5e4709_1	saliva	PAIRED	PCR	GENOMIC	Streptococcus mutans	ILLUMINA	2025-02-20T00:00:00Z	2025-02-20T03:39:00Z	1	18de73c7_1	Swab collection media	SRP565161	1
SRR32408454	AMPLICON	302	3625812	PRJNA1225904	SAMN46908868	Microbe\, viral or environmental	2614170	NORTHERN ARIZONA UNIVERSITY	2017/2019	SRX27738892	USA	North America	USA: Hawaii	Homo sapiens	Illumina MiSeq	hi639aca_2	saliva	PAIRED	PCR	GENOMIC	Streptococcus mutans	ILLUMINA	2025-02-20T00:00:00Z	2025-02-20T03:40:00Z	1	7fa945a8_2	Swab collection media	SRP565161	2
SRR32408445	AMPLICON	302	54273628	PRJNA1225904	SAMN46908875	Microbe\, viral or environmental	32050984	NORTHERN ARIZONA UNIVERSITY	2017/2019	SRX27738901	USA	North America	USA: Hawaii	Homo sapiens	Illumina MiSeq	hi67c343_1	saliva	PAIRED	PCR	GENOMIC	Streptococcus mutans	ILLUMINA	2025-02-20T00:00:00Z	2025-02-20T03:40:00Z	1	93619ecd_1	Swab collection media	SRP565161	1
SRR32408435	AMPLICON	302	6036678	PRJNA1225904	SAMN46908876	Microbe\, viral or environmental	2154150	NORTHERN ARIZONA UNIVERSITY	2017/2019	SRX27738911	USA	North America	USA: Hawaii	Homo sapiens	Illumina MiSeq	hi67c343_2	saliva	PAIRED	PCR	GENOMIC	Streptococcus mutans	ILLUMINA	2025-02-20T00:00:00Z	2025-02-20T03:39:00Z	1	93619ecd_2	Swab collection media	SRP565161	2
SRR32408452	AMPLICON	502	251502	PRJNA1225904	SAMN46908877	Microbe\, viral or environmental	224951	NORTHERN ARIZONA UNIVERSITY	2017/2019	SRX27738894	USA	North America	USA: Hawaii	Homo sapiens	Illumina MiSeq	hi67c343_3	saliva	PAIRED	PCR	GENOMIC	Streptococcus mutans	ILLUMINA	2025-02-20T00:00:00Z	2025-02-20T03:39:00Z	1	93619ecd_3	Swab collection media	SRP565161	3
SRR32408426	AMPLICON	302	34824224	PRJNA1225904	SAMN46908836	Microbe\, viral or environmental	21997193	NORTHERN ARIZONA UNIVERSITY	2017/2019	SRX27738920	USA	North America	USA: Hawaii	Homo sapiens	Illumina MiSeq	hi75f9bc_1	saliva	PAIRED	PCR	GENOMIC	Streptococcus mutans	ILLUMINA	2025-02-20T00:00:00Z	2025-02-20T03:40:00Z	1	00f7fdbe_1	Swab collection media	SRP565161	1
SRR32408475	AMPLICON	302	4461446	PRJNA1225904	SAMN46908881	Microbe\, viral or environmental	3105951	NORTHERN ARIZONA UNIVERSITY	2017/2019	SRX27738872	USA	North America	USA: Hawaii	Homo sapiens	Illumina MiSeq	hi775081_1	saliva	PAIRED	PCR	GENOMIC	Streptococcus mutans	ILLUMINA	2025-02-20T00:00:00Z	2025-02-20T03:40:00Z	1	bb120655_1	Swab collection media	SRP565161	1
SRR32408479	AMPLICON	502	8961704	PRJNA1225904	SAMN46908863	Microbe\, viral or environmental	5915752	NORTHERN ARIZONA UNIVERSITY	2017/2019	SRX27738868	USA	North America	USA: Hawaii	Homo sapiens	Illumina MiSeq	hi861121_1	saliva	PAIRED	PCR	GENOMIC	Streptococcus mutans	ILLUMINA	2025-02-20T00:00:00Z	2025-02-20T03:40:00Z	1	77c43471_1	Swab collection media	SRP565161	1
SRR32408466	AMPLICON	502	9014916	PRJNA1225904	SAMN46908860	Microbe\, viral or environmental	5923073	NORTHERN ARIZONA UNIVERSITY	2017/2019	SRX27738881	USA	North America	USA: Hawaii	Homo sapiens	Illumina MiSeq	hi8c68aa_2	saliva	PAIRED	PCR	GENOMIC	Streptococcus mutans	ILLUMINA	2025-02-20T00:00:00Z	2025-02-20T03:40:00Z	1	683a1ddc_2	Swab collection media	SRP565161	2
SRR32408540	AMPLICON	302	1392522	PRJNA1225904	SAMN46908861	Microbe\, viral or environmental	967053	NORTHERN ARIZONA UNIVERSITY	2017/2019	SRX27738806	USA	North America	USA: Hawaii	Homo sapiens	Illumina MiSeq	hi9861be_2	saliva	PAIRED	PCR	GENOMIC	Streptococcus mutans	ILLUMINA	2025-02-20T00:00:00Z	2025-02-20T03:40:00Z	1	6961e1af_2	Swab collection media	SRP565161	2
SRR32408473	AMPLICON	302	4214108	PRJNA1225904	SAMN46908839	Microbe\, viral or environmental	2721837	NORTHERN ARIZONA UNIVERSITY	2017/2019	SRX27738874	USA	North America	USA: Hawaii	Homo sapiens	Illumina MiSeq	hi994748_1	saliva	PAIRED	PCR	GENOMIC	Streptococcus mutans	ILLUMINA	2025-02-20T00:00:00Z	2025-02-20T03:39:00Z	1	172e1c5d_1	Swab collection media	SRP565161	1
SRR32408438	AMPLICON	302	4571072	PRJNA1225904	SAMN46908880	Microbe\, viral or environmental	3023586	NORTHERN ARIZONA UNIVERSITY	2017/2019	SRX27738908	USA	North America	USA: Hawaii	Homo sapiens	Illumina MiSeq	hi9a1c75_A	saliva	PAIRED	PCR	GENOMIC	Streptococcus mutans	ILLUMINA	2025-02-20T00:00:00Z	2025-02-20T03:39:00Z	1	a438f95d_A	Swab collection media	SRP565161	A
SRR32408457	AMPLICON	502	3705764	PRJNA1225904	SAMN46908872	Microbe\, viral or environmental	2446133	NORTHERN ARIZONA UNIVERSITY	2017/2019	SRX27738889	USA	North America	USA: Hawaii	Homo sapiens	Illumina MiSeq	hia2400f_2	saliva	PAIRED	PCR	GENOMIC	Streptococcus mutans	ILLUMINA	2025-02-20T00:00:00Z	2025-02-20T03:39:00Z	1	891d60f3_2	Swab collection media	SRP565161	2
SRR32408504	AMPLICON	302	11328020	PRJNA1225904	SAMN46908900	Microbe\, viral or environmental	3961508	NORTHERN ARIZONA UNIVERSITY	2017/2019	SRX27738842	USA	North America	USA: Hawaii	Homo sapiens	Illumina MiSeq	hia54b18_1	saliva	PAIRED	PCR	GENOMIC	Streptococcus mutans	ILLUMINA	2025-02-20T00:00:00Z	2025-02-20T03:40:00Z	1	fe69e7fa_1	Swab collection media	SRP565161	1
SRR32408480	AMPLICON	302	35050120	PRJNA1225904	SAMN46908855	Microbe\, viral or environmental	19950163	NORTHERN ARIZONA UNIVERSITY	2017/2019	SRX27738867	USA	North America	USA: Hawaii	Homo sapiens	Illumina MiSeq	hia77d64_1	saliva	PAIRED	PCR	GENOMIC	Streptococcus mutans	ILLUMINA	2025-02-20T00:00:00Z	2025-02-20T03:40:00Z	1	5afdef36_1	Swab collection media	SRP565161	1
SRR32408415	AMPLICON	302	236370266	PRJNA1225904	SAMN46908856	Microbe\, viral or environmental	81797590	NORTHERN ARIZONA UNIVERSITY	2017/2019	SRX27738931	USA	North America	USA: Hawaii	Homo sapiens	Illumina MiSeq	hia77d64_2	saliva	PAIRED	PCR	GENOMIC	Streptococcus mutans	ILLUMINA	2025-02-20T00:00:00Z	2025-02-20T03:40:00Z	1	5afdef36_2	Swab collection media	SRP565161	2
SRR32408510	AMPLICON	502	3104870	PRJNA1225904	SAMN46908845	Microbe\, viral or environmental	1982362	NORTHERN ARIZONA UNIVERSITY	2017/2019	SRX27738836	USA	North America	USA: Hawaii	Homo sapiens	Illumina MiSeq	hiab92b6_A	saliva	PAIRED	PCR	GENOMIC	Streptococcus mutans	ILLUMINA	2025-02-20T00:00:00Z	2025-02-20T03:40:00Z	1	4359920_A	Swab collection media	SRP565161	A
SRR32408422	AMPLICON	502	4870404	PRJNA1225904	SAMN46908846	Microbe\, viral or environmental	3208923	NORTHERN ARIZONA UNIVERSITY	2017/2019	SRX27738924	USA	North America	USA: Hawaii	Homo sapiens	Illumina MiSeq	hiab92b6_B	saliva	PAIRED	PCR	GENOMIC	Streptococcus mutans	ILLUMINA	2025-02-20T00:00:00Z	2025-02-20T03:40:00Z	1	4359920_B	Swab collection media	SRP565161	B
SRR32408559	AMPLICON	302	4536946	PRJNA1225904	SAMN46908837	Microbe\, viral or environmental	2793207	NORTHERN ARIZONA UNIVERSITY	2017/2019	SRX27738787	USA	North America	USA: Hawaii	Homo sapiens	Illumina MiSeq	hib3799f_A	saliva	PAIRED	PCR	GENOMIC	Streptococcus mutans	ILLUMINA	2025-02-20T00:00:00Z	2025-02-20T03:40:00Z	1	089ad76a_A	Swab collection media	SRP565161	A
SRR32408462	AMPLICON	302	8469892	PRJNA1225904	SAMN46908873	Microbe\, viral or environmental	5269558	NORTHERN ARIZONA UNIVERSITY	2017/2019	SRX27738885	USA	North America	USA: Hawaii	Homo sapiens	Illumina MiSeq	hib3f8f9_1	saliva	PAIRED	PCR	GENOMIC	Streptococcus mutans	ILLUMINA	2025-02-20T00:00:00Z	2025-02-20T03:39:00Z	1	8ac01721_1	Swab collection media	SRP565161	1
SRR32408517	AMPLICON	502	3488900	PRJNA1225904	SAMN46908874	Microbe\, viral or environmental	2268758	NORTHERN ARIZONA UNIVERSITY	2017/2019	SRX27738829	USA	North America	USA: Hawaii	Homo sapiens	Illumina MiSeq	hib3f8f9_2	saliva	PAIRED	PCR	GENOMIC	Streptococcus mutans	ILLUMINA	2025-02-20T00:00:00Z	2025-02-20T03:40:00Z	1	8ac01721_2	Swab collection media	SRP565161	2
SRR32408472	AMPLICON	302	52268952	PRJNA1225904	SAMN46908891	Microbe\, viral or environmental	33610538	NORTHERN ARIZONA UNIVERSITY	2017/2019	SRX27738875	USA	North America	USA: Hawaii	Homo sapiens	Illumina MiSeq	hib5230b_1	saliva	PAIRED	PCR	GENOMIC	Streptococcus mutans	ILLUMINA	2025-02-20T00:00:00Z	2025-02-20T03:40:00Z	1	e6322762_1	Swab collection media	SRP565161	1
SRR32408434	AMPLICON	502	746976	PRJNA1225904	SAMN46908892	Microbe\, viral or environmental	548891	NORTHERN ARIZONA UNIVERSITY	2017/2019	SRX27738912	USA	North America	USA: Hawaii	Homo sapiens	Illumina MiSeq	hib5230b_3	saliva	PAIRED	PCR	GENOMIC	Streptococcus mutans	ILLUMINA	2025-02-20T00:00:00Z	2025-02-20T03:39:00Z	1	e6322762_3	Swab collection media	SRP565161	3
SRR32408416	AMPLICON	502	4735366	PRJNA1225904	SAMN46908841	Microbe\, viral or environmental	2964406	NORTHERN ARIZONA UNIVERSITY	2017/2019	SRX27738930	USA	North America	USA: Hawaii	Homo sapiens	Illumina MiSeq	hib6a717_2	saliva	PAIRED	PCR	GENOMIC	Streptococcus mutans	ILLUMINA	2025-02-20T00:00:00Z	2025-02-20T03:39:00Z	1	1c77ed36_2	Swab collection media	SRP565161	2
SRR32408459	AMPLICON	302	35680394	PRJNA1225904	SAMN46908850	Microbe\, viral or environmental	21966333	NORTHERN ARIZONA UNIVERSITY	2017/2019	SRX27738887	USA	North America	USA: Hawaii	Homo sapiens	Illumina MiSeq	hic24a4a_1	saliva	PAIRED	PCR	GENOMIC	Streptococcus mutans	ILLUMINA	2025-02-20T00:00:00Z	2025-02-20T03:40:00Z	1	4e65791c_1	Swab collection media	SRP565161	1
SRR32408529	AMPLICON	502	334834	PRJNA1225904	SAMN46908851	Microbe\, viral or environmental	275001	NORTHERN ARIZONA UNIVERSITY	2017/2019	SRX27738817	USA	North America	USA: Hawaii	Homo sapiens	Illumina MiSeq	hic24a4a_3	saliva	PAIRED	PCR	GENOMIC	Streptococcus mutans	ILLUMINA	2025-02-20T00:00:00Z	2025-02-20T03:40:00Z	1	4e65791c_3	Swab collection media	SRP565161	3
SRR32408539	AMPLICON	302	96344946	PRJNA1225904	SAMN46908898	Microbe\, viral or environmental	62543774	NORTHERN ARIZONA UNIVERSITY	2017/2019	SRX27738807	USA	North America	USA: Hawaii	Homo sapiens	Illumina MiSeq	hic41c7d_1	saliva	PAIRED	PCR	GENOMIC	Streptococcus mutans	ILLUMINA	2025-02-20T00:00:00Z	2025-02-20T03:40:00Z	1	fba0f7bc_1	Swab collection media	SRP565161	1
SRR32408498	AMPLICON	302	441563864	PRJNA1225904	SAMN46908899	Microbe\, viral or environmental	153177743	NORTHERN ARIZONA UNIVERSITY	2017/2019	SRX27738848	USA	North America	USA: Hawaii	Homo sapiens	Illumina MiSeq	hic41c7d_2	saliva	PAIRED	PCR	GENOMIC	Streptococcus mutans	ILLUMINA	2025-02-20T00:00:00Z	2025-02-20T03:40:00Z	1	fba0f7bc_2	Swab collection media	SRP565161	2
SRR32408521	AMPLICON	502	2030088	PRJNA1225904	SAMN46908883	Microbe\, viral or environmental	1249910	NORTHERN ARIZONA UNIVERSITY	2017/2019	SRX27738825	USA	North America	USA: Hawaii	Homo sapiens	Illumina MiSeq	hiccc2dc_1	saliva	PAIRED	PCR	GENOMIC	Streptococcus mutans	ILLUMINA	2025-02-20T00:00:00Z	2025-02-20T03:40:00Z	1	c25256c8_1	Swab collection media	SRP565161	1
SRR32408389	AMPLICON	502	2420644	PRJNA1225904	SAMN46908884	Microbe\, viral or environmental	1574862	NORTHERN ARIZONA UNIVERSITY	2017/2019	SRX27738957	USA	North America	USA: Hawaii	Homo sapiens	Illumina MiSeq	hiccc2dc_2	saliva	PAIRED	PCR	GENOMIC	Streptococcus mutans	ILLUMINA	2025-02-20T00:00:00Z	2025-02-20T03:39:00Z	1	c25256c8_2	Swab collection media	SRP565161	2
SRR32408527	AMPLICON	302	4436984	PRJNA1225904	SAMN46908864	Microbe\, viral or environmental	3122252	NORTHERN ARIZONA UNIVERSITY	2017/2019	SRX27738819	USA	North America	USA: Hawaii	Homo sapiens	Illumina MiSeq	hid12822_1	saliva	PAIRED	PCR	GENOMIC	Streptococcus mutans	ILLUMINA	2025-02-20T00:00:00Z	2025-02-20T03:40:00Z	1	78ab75ce_1	Swab collection media	SRP565161	1
SRR32408412	AMPLICON	502	3187700	PRJNA1225904	SAMN46908882	Microbe\, viral or environmental	2009942	NORTHERN ARIZONA UNIVERSITY	2017/2019	SRX27738934	USA	North America	USA: Hawaii	Homo sapiens	Illumina MiSeq	hid223f6_B	saliva	PAIRED	PCR	GENOMIC	Streptococcus mutans	ILLUMINA	2025-02-20T00:00:00Z	2025-02-20T03:39:00Z	1	bc933783_B	Swab collection media	SRP565161	B
SRR32408391	AMPLICON	302	8187220	PRJNA1225904	SAMN46908867	Microbe\, viral or environmental	5460784	NORTHERN ARIZONA UNIVERSITY	2017/2019	SRX27738955	USA	North America	USA: Hawaii	Homo sapiens	Illumina MiSeq	hie35de2_A	saliva	PAIRED	PCR	GENOMIC	Streptococcus mutans	ILLUMINA	2025-02-20T00:00:00Z	2025-02-20T03:39:00Z	1	7eefdabe_A	Swab collection media	SRP565161	A
SRR32408523	AMPLICON	302	7012440	PRJNA1225904	SAMN46908858	Microbe\, viral or environmental	2471242	NORTHERN ARIZONA UNIVERSITY	2017/2019	SRX27738823	USA	North America	USA: Hawaii	Homo sapiens	Illumina MiSeq	hiecabac_1	saliva	PAIRED	PCR	GENOMIC	Streptococcus mutans	ILLUMINA	2025-02-20T00:00:00Z	2025-02-20T03:40:00Z	1	67d0f44c_1	Swab collection media	SRP565161	1
SRR32408411	AMPLICON	302	2641594	PRJNA1225904	SAMN46908859	Microbe\, viral or environmental	997239	NORTHERN ARIZONA UNIVERSITY	2017/2019	SRX27738935	USA	North America	USA: Hawaii	Homo sapiens	Illumina MiSeq	hiecabac_2	saliva	PAIRED	PCR	GENOMIC	Streptococcus mutans	ILLUMINA	2025-02-20T00:00:00Z	2025-02-20T03:39:00Z	1	67d0f44c_2	Swab collection media	SRP565161	2
SRR32408413	AMPLICON	502	6959728	PRJNA1225904	SAMN46908838	Microbe\, viral or environmental	4654539	NORTHERN ARIZONA UNIVERSITY	2017/2019	SRX27738933	USA	North America	USA: Hawaii	Homo sapiens	Illumina MiSeq	hieecb6f_B	saliva	PAIRED	PCR	GENOMIC	Streptococcus mutans	ILLUMINA	2025-02-20T00:00:00Z	2025-02-20T03:39:00Z	1	0be731e0_B	Swab collection media	SRP565161	B
SRR32408448	AMPLICON	502	12796482	PRJNA1225904	SAMN46908888	Microbe\, viral or environmental	8168457	NORTHERN ARIZONA UNIVERSITY	2017/2019	SRX27738898	USA	North America	USA: Hawaii	Homo sapiens	Illumina MiSeq	hifb6579_1	saliva	PAIRED	PCR	GENOMIC	Streptococcus mutans	ILLUMINA	2025-02-20T00:00:00Z	2025-02-20T03:40:00Z	1	ce415615_1	Swab collection media	SRP565161	1
SRR32408464	AMPLICON	502	2411608	PRJNA1225904	SAMN46908889	Microbe\, viral or environmental	1595321	NORTHERN ARIZONA UNIVERSITY	2017/2019	SRX27738883	USA	North America	USA: Hawaii	Homo sapiens	Illumina MiSeq	hifb6579_2	saliva	PAIRED	PCR	GENOMIC	Streptococcus mutans	ILLUMINA	2025-02-20T00:00:00Z	2025-02-20T03:39:00Z	1	ce415615_2	Swab collection media	SRP565161	2
SRR32408440	AMPLICON	586	153744132	PRJNA1225904	SAMN46908920	Microbe\, viral or environmental	103180842	NORTHERN ARIZONA UNIVERSITY	2021/2022	SRX27738906	USA	North America	USA: Arizona	Homo sapiens	Illumina MiSeq	naz00f4be_2	saliva	PAIRED	PCR	GENOMIC	Streptococcus mutans	ILLUMINA	2025-02-20T00:00:00Z	2025-02-20T03:40:00Z	1	naz3051daf4	Swab collection media	SRP565161
SRR32408396	AMPLICON	302	485517850	PRJNA1225904	SAMN46908931	Microbe\, viral or environmental	173895837	NORTHERN ARIZONA UNIVERSITY	2021/2022	SRX27738950	USA	North America	USA: Arizona	Homo sapiens	Illumina MiSeq	naz0192f0_3	saliva	PAIRED	PCR	GENOMIC	Streptococcus mutans	ILLUMINA	2025-02-20T00:00:00Z	2025-02-20T03:40:00Z	1	naz55d77cb4	Swab collection media	SRP565161
SRR32408450	AMPLICON	502	46198056	PRJNA1225904	SAMN46908998	Microbe\, viral or environmental	32399729	NORTHERN ARIZONA UNIVERSITY	2021/2022	SRX27738896	USA	North America	USA: Arizona	Homo sapiens	Illumina MiSeq	naz04edb9_1	saliva	PAIRED	PCR	GENOMIC	Streptococcus mutans	ILLUMINA	2025-02-20T00:00:00Z	2025-02-20T03:40:00Z	1	naze5bd6912	Swab collection media	SRP565161
SRR32408427	AMPLICON	302	1958772	PRJNA1225904	SAMN46908971	Microbe\, viral or environmental	774984	NORTHERN ARIZONA UNIVERSITY	2021/2022	SRX27738919	USA	North America	USA: Arizona	Homo sapiens	Illumina MiSeq	naz04edb9_4	saliva	PAIRED	PCR	GENOMIC	Streptococcus mutans	ILLUMINA	2025-02-20T00:00:00Z	2025-02-20T03:39:00Z	1	nazb224c4a7	Swab collection media	SRP565161
SRR32408545	AMPLICON	302	8011456	PRJNA1225904	SAMN46908986	Microbe\, viral or environmental	3056733	NORTHERN ARIZONA UNIVERSITY	2021/2022	SRX27738801	USA	North America	USA: Arizona	Homo sapiens	Illumina MiSeq	naz08719d_3	saliva	PAIRED	PCR	GENOMIC	Streptococcus mutans	ILLUMINA	2025-02-20T00:00:00Z	2025-02-20T03:40:00Z	1	nazc6b09d62	Swab collection media	SRP565161
SRR32408392	AMPLICON	302	1365946	PRJNA1225904	SAMN46909003	Microbe\, viral or environmental	549651	NORTHERN ARIZONA UNIVERSITY	2021/2022	SRX27738954	USA	North America	USA: Arizona	Homo sapiens	Illumina MiSeq	naz0c33ec_4	saliva	PAIRED	PCR	GENOMIC	Streptococcus mutans	ILLUMINA	2025-02-20T00:00:00Z	2025-02-20T03:39:00Z	1	nazf53bfa9d	Swab collection media	SRP565161
SRR32408443	AMPLICON	302	3021510	PRJNA1225904	SAMN46908962	Microbe\, viral or environmental	1124338	NORTHERN ARIZONA UNIVERSITY	2021/2022	SRX27738903	USA	North America	USA: Arizona	Homo sapiens	Illumina MiSeq	naz0c5f8d_2	saliva	PAIRED	PCR	GENOMIC	Streptococcus mutans	ILLUMINA	2025-02-20T00:00:00Z	2025-02-20T03:39:00Z	1	naz988dbd16	Swab collection media	SRP565161
SRR32408417	AMPLICON	302	10590838	PRJNA1225904	SAMN46908934	Microbe\, viral or environmental	3763927	NORTHERN ARIZONA UNIVERSITY	2021/2022	SRX27738929	USA	North America	USA: Arizona	Homo sapiens	Illumina MiSeq	naz0dea3d_2	saliva	PAIRED	PCR	GENOMIC	Streptococcus mutans	ILLUMINA	2025-02-20T00:00:00Z	2025-02-20T03:39:00Z	1	naz69ef9d19	Swab collection media	SRP565161
SRR32408482	AMPLICON	302	1925854	PRJNA1225904	SAMN46908917	Microbe\, viral or environmental	733913	NORTHERN ARIZONA UNIVERSITY	2021/2022	SRX27738865	USA	North America	USA: Arizona	Homo sapiens	Illumina MiSeq	naz134b09_3	saliva	PAIRED	PCR	GENOMIC	Streptococcus mutans	ILLUMINA	2025-02-20T00:00:00Z	2025-02-20T03:39:00Z	1	naz25acc626	Swab collection media	SRP565161
SRR32408423	AMPLICON	302	2424758	PRJNA1225904	SAMN46908955	Microbe\, viral or environmental	910091	NORTHERN ARIZONA UNIVERSITY	2021/2022	SRX27738923	USA	North America	USA: Arizona	Homo sapiens	Illumina MiSeq	naz134b09_4	saliva	PAIRED	PCR	GENOMIC	Streptococcus mutans	ILLUMINA	2025-02-20T00:00:00Z	2025-02-20T03:39:00Z	1	naz8ad19acc	Swab collection media	SRP565161
SRR32408497	AMPLICON	302	9665208	PRJNA1225904	SAMN46908904	Microbe\, viral or environmental	3581504	NORTHERN ARIZONA UNIVERSITY	2021/2022	SRX27738849	USA	North America	USA: Arizona	Homo sapiens	Illumina MiSeq	naz172d49_2	saliva	PAIRED	PCR	GENOMIC	Streptococcus mutans	ILLUMINA	2025-02-20T00:00:00Z	2025-02-20T03:40:00Z	1	naz0a08d5da	Swab collection media	SRP565161
SRR32408401	AMPLICON	302	492226176	PRJNA1225904	SAMN46909002	Microbe\, viral or environmental	175971025	NORTHERN ARIZONA UNIVERSITY	2021/2022	SRX27738945	USA	North America	USA: Arizona	Homo sapiens	Illumina MiSeq	naz17c3cf_2	saliva	PAIRED	PCR	GENOMIC	Streptococcus mutans	ILLUMINA	2025-02-20T00:00:00Z	2025-02-20T03:40:00Z	1	nazf2af471d	Swab collection media	SRP565161
SRR32408470	AMPLICON	602	150126760	PRJNA1225904	SAMN46908954	Microbe\, viral or environmental	86529244	NORTHERN ARIZONA UNIVERSITY	2021/2022	SRX27738877	USA	North America	USA: Arizona	Homo sapiens	Illumina MiSeq	naz17fcc4_1	saliva	PAIRED	PCR	GENOMIC	Streptococcus mutans	ILLUMINA	2025-02-20T00:00:00Z	2025-02-20T03:40:00Z	1	naz8a3ea4a6	Swab collection media	SRP565161
SRR32408525	AMPLICON	602	371064974	PRJNA1225904	SAMN46908954	Microbe\, viral or environmental	205608352	NORTHERN ARIZONA UNIVERSITY	2021/2022	SRX27738821	USA	North America	USA: Arizona	Homo sapiens	Illumina MiSeq	naz17fcc4_1	saliva	PAIRED	PCR	GENOMIC	Streptococcus mutans	ILLUMINA	2025-02-20T00:00:00Z	2025-02-20T03:41:00Z	1	naz8a3ea4a6	Swab collection media	SRP565161
SRR32408530	AMPLICON	302	6301230	PRJNA1225904	SAMN46908903	Microbe\, viral or environmental	2303041	NORTHERN ARIZONA UNIVERSITY	2021/2022	SRX27738816	USA	North America	USA: Arizona	Homo sapiens	Illumina MiSeq	naz1a28c4_3	saliva	PAIRED	PCR	GENOMIC	Streptococcus mutans	ILLUMINA	2025-02-20T00:00:00Z	2025-02-20T03:40:00Z	1	naz07e24c9b	Swab collection media	SRP565161
SRR32408397	AMPLICON	302	20969370	PRJNA1225904	SAMN46908918	Microbe\, viral or environmental	7325393	NORTHERN ARIZONA UNIVERSITY	2021/2022	SRX27738949	USA	North America	USA: Arizona	Homo sapiens	Illumina MiSeq	naz1d7e8c_2	saliva	PAIRED	PCR	GENOMIC	Streptococcus mutans	ILLUMINA	2025-02-20T00:00:00Z	2025-02-20T03:39:00Z	1	naz28366b01	Swab collection media	SRP565161
SRR32408548	AMPLICON	302	1388898	PRJNA1225904	SAMN46908996	Microbe\, viral or environmental	555698	NORTHERN ARIZONA UNIVERSITY	2021/2022	SRX27738798	USA	North America	USA: Arizona	Homo sapiens	Illumina MiSeq	naz21717f_3	saliva	PAIRED	PCR	GENOMIC	Streptococcus mutans	ILLUMINA	2025-02-20T00:00:00Z	2025-02-20T03:40:00Z	1	naze4850c2e	Swab collection media	SRP565161
SRR32408456	AMPLICON	302	12936472	PRJNA1225904	SAMN46908978	Microbe\, viral or environmental	4825338	NORTHERN ARIZONA UNIVERSITY	2021/2022	SRX27738890	USA	North America	USA: Arizona	Homo sapiens	Illumina MiSeq	naz2386ff_2	saliva	PAIRED	PCR	GENOMIC	Streptococcus mutans	ILLUMINA	2025-02-20T00:00:00Z	2025-02-20T03:40:00Z	1	nazbf48e13b	Swab collection media	SRP565161
SRR32408496	AMPLICON	302	10036668	PRJNA1225904	SAMN46908941	Microbe\, viral or environmental	3599655	NORTHERN ARIZONA UNIVERSITY	2021/2022	SRX27738850	USA	North America	USA: Arizona	Homo sapiens	Illumina MiSeq	naz2d1641_2	saliva	PAIRED	PCR	GENOMIC	Streptococcus mutans	ILLUMINA	2025-02-20T00:00:00Z	2025-02-20T03:40:00Z	1	naz762ab775	Swab collection media	SRP565161
SRR32408428	AMPLICON	302	4708784	PRJNA1225904	SAMN46908993	Microbe\, viral or environmental	1663165	NORTHERN ARIZONA UNIVERSITY	2021/2022	SRX27738918	USA	North America	USA: Arizona	Homo sapiens	Illumina MiSeq	naz2dcee3_1	saliva	PAIRED	PCR	GENOMIC	Streptococcus mutans	ILLUMINA	2025-02-20T00:00:00Z	2025-02-20T03:39:00Z	1	nazde6e2b44	Swab collection media	SRP565161
SRR32408398	AMPLICON	302	11276982	PRJNA1225904	SAMN46908929	Microbe\, viral or environmental	4226762	NORTHERN ARIZONA UNIVERSITY	2021/2022	SRX27738948	USA	North America	USA: Arizona	Homo sapiens	Illumina MiSeq	naz2e9f7b_3	saliva	PAIRED	PCR	GENOMIC	Streptococcus mutans	ILLUMINA	2025-02-20T00:00:00Z	2025-02-20T03:39:00Z	1	naz53a2c38e	Swab collection media	SRP565161
SRR32408436	AMPLICON	302	8176046	PRJNA1225904	SAMN46908964	Microbe\, viral or environmental	2978351	NORTHERN ARIZONA UNIVERSITY	2021/2022	SRX27738910	USA	North America	USA: Arizona	Homo sapiens	Illumina MiSeq	naz2e9f7b_4	saliva	PAIRED	PCR	GENOMIC	Streptococcus mutans	ILLUMINA	2025-02-20T00:00:00Z	2025-02-20T03:39:00Z	1	naz9c05cee6	Swab collection media	SRP565161
SRR32408407	AMPLICON	302	18049332	PRJNA1225904	SAMN46908914	Microbe\, viral or environmental	6268978	NORTHERN ARIZONA UNIVERSITY	2021/2022	SRX27738939	USA	North America	USA: Arizona	Homo sapiens	Illumina MiSeq	naz3331da_2	saliva	PAIRED	PCR	GENOMIC	Streptococcus mutans	ILLUMINA	2025-02-20T00:00:00Z	2025-02-20T03:39:00Z	1	naz239672e7	Swab collection media	SRP565161
SRR32408447	AMPLICON	302	6029128	PRJNA1225904	SAMN46908916	Microbe\, viral or environmental	2324281	NORTHERN ARIZONA UNIVERSITY	2021/2022	SRX27738899	USA	North America	USA: Arizona	Homo sapiens	Illumina MiSeq	naz3a14ff_2	saliva	PAIRED	PCR	GENOMIC	Streptococcus mutans	ILLUMINA	2025-02-20T00:00:00Z	2025-02-20T03:39:00Z	1	naz258ae443	Swab collection media	SRP565161
SRR32408520	AMPLICON	302	834728	PRJNA1225904	SAMN46908994	Microbe\, viral or environmental	362544	NORTHERN ARIZONA UNIVERSITY	2021/2022	SRX27738826	USA	North America	USA: Arizona	Homo sapiens	Illumina MiSeq	naz3a4076_2	saliva	PAIRED	PCR	GENOMIC	Streptococcus mutans	ILLUMINA	2025-02-20T00:00:00Z	2025-02-20T03:40:00Z	1	naze1b61375	Swab collection media	SRP565161
SRR32408393	AMPLICON	302	10407524	PRJNA1225904	SAMN46908922	Microbe\, viral or environmental	3899922	NORTHERN ARIZONA UNIVERSITY	2021/2022	SRX27738953	USA	North America	USA: Arizona	Homo sapiens	Illumina MiSeq	naz3f8e8b_2	saliva	PAIRED	PCR	GENOMIC	Streptococcus mutans	ILLUMINA	2025-02-20T00:00:00Z	2025-02-20T03:39:00Z	1	naz34046495	Swab collection media	SRP565161
SRR32408537	AMPLICON	302	11538514	PRJNA1225904	SAMN46908939	Microbe\, viral or environmental	4386577	NORTHERN ARIZONA UNIVERSITY	2021/2022	SRX27738809	USA	North America	USA: Arizona	Homo sapiens	Illumina MiSeq	naz406c99_4	saliva	PAIRED	PCR	GENOMIC	Streptococcus mutans	ILLUMINA	2025-02-20T00:00:00Z	2025-02-20T03:40:00Z	1	naz74d2e816	Swab collection media	SRP565161
SRR32408405	AMPLICON	302	1451412	PRJNA1225904	SAMN46908977	Microbe\, viral or environmental	575513	NORTHERN ARIZONA UNIVERSITY	2021/2022	SRX27738941	USA	North America	USA: Arizona	Homo sapiens	Illumina MiSeq	naz45f826_1	saliva	PAIRED	PCR	GENOMIC	Streptococcus mutans	ILLUMINA	2025-02-20T00:00:00Z	2025-02-20T03:39:00Z	1	nazbdc776ee	Swab collection media	SRP565161
SRR32408414	AMPLICON	302	8708472	PRJNA1225904	SAMN46908960	Microbe\, viral or environmental	3208034	NORTHERN ARIZONA UNIVERSITY	2021/2022	SRX27738932	USA	North America	USA: Arizona	Homo sapiens	Illumina MiSeq	naz47e35e_2	saliva	PAIRED	PCR	GENOMIC	Streptococcus mutans	ILLUMINA	2025-02-20T00:00:00Z	2025-02-20T03:39:00Z	1	naz9648f640	Swab collection media	SRP565161
SRR32408483	AMPLICON	302	1328196	PRJNA1225904	SAMN46909000	Microbe\, viral or environmental	533201	NORTHERN ARIZONA UNIVERSITY	2021/2022	SRX27738864	USA	North America	USA: Arizona	Homo sapiens	Illumina MiSeq	naz49cf62_4	saliva	PAIRED	PCR	GENOMIC	Streptococcus mutans	ILLUMINA	2025-02-20T00:00:00Z	2025-02-20T03:39:00Z	1	nazec26b55e	Swab collection media	SRP565161
SRR32408425	AMPLICON	302	463174380	PRJNA1225904	SAMN46908924	Microbe\, viral or environmental	165769982	NORTHERN ARIZONA UNIVERSITY	2021/2022	SRX27738921	USA	North America	USA: Arizona	Homo sapiens	Illumina MiSeq	naz4b0b87_2	saliva	PAIRED	PCR	GENOMIC	Streptococcus mutans	ILLUMINA	2025-02-20T00:00:00Z	2025-02-20T03:40:00Z	1	naz3ad00a5a	Swab collection media	SRP565161
SRR32408433	AMPLICON	302	12300158	PRJNA1225904	SAMN46908928	Microbe\, viral or environmental	4517990	NORTHERN ARIZONA UNIVERSITY	2021/2022	SRX27738913	USA	North America	USA: Arizona	Homo sapiens	Illumina MiSeq	naz4b0b87_4	saliva	PAIRED	PCR	GENOMIC	Streptococcus mutans	ILLUMINA	2025-02-20T00:00:00Z	2025-02-20T03:39:00Z	1	naz4ea253b2	Swab collection media	SRP565161
SRR32408536	AMPLICON	302	6160800	PRJNA1225904	SAMN46908976	Microbe\, viral or environmental	2317815	NORTHERN ARIZONA UNIVERSITY	2021/2022	SRX27738810	USA	North America	USA: Arizona	Homo sapiens	Illumina MiSeq	naz4b804a_2	saliva	PAIRED	PCR	GENOMIC	Streptococcus mutans	ILLUMINA	2025-02-20T00:00:00Z	2025-02-20T03:40:00Z	1	nazbbdbb6ce	Swab collection media	SRP565161
SRR32408500	AMPLICON	302	16519098	PRJNA1225904	SAMN46908945	Microbe\, viral or environmental	5735517	NORTHERN ARIZONA UNIVERSITY	2021/2022	SRX27738846	USA	North America	USA: Arizona	Homo sapiens	Illumina MiSeq	naz4e3c6e_1	saliva	PAIRED	PCR	GENOMIC	Streptococcus mutans	ILLUMINA	2025-02-20T00:00:00Z	2025-02-20T03:40:00Z	1	naz7c0ce57a	Swab collection media	SRP565161
SRR32408441	AMPLICON	302	8680688	PRJNA1225904	SAMN46908936	Microbe\, viral or environmental	3243518	NORTHERN ARIZONA UNIVERSITY	2021/2022	SRX27738905	USA	North America	USA: Arizona	Homo sapiens	Illumina MiSeq	naz4ea341_2	saliva	PAIRED	PCR	GENOMIC	Streptococcus mutans	ILLUMINA	2025-02-20T00:00:00Z	2025-02-20T03:40:00Z	1	naz6cb7dbbc	Swab collection media	SRP565161
SRR32408463	AMPLICON	302	11332550	PRJNA1225904	SAMN46908912	Microbe\, viral or environmental	3937618	NORTHERN ARIZONA UNIVERSITY	2021/2022	SRX27738884	USA	North America	USA: Arizona	Homo sapiens	Illumina MiSeq	naz516242_4	saliva	PAIRED	PCR	GENOMIC	Streptococcus mutans	ILLUMINA	2025-02-20T00:00:00Z	2025-02-20T03:40:00Z	1	naz1bee95fe	Swab collection media	SRP565161
SRR32408419	AMPLICON	302	532877188	PRJNA1225904	SAMN46908940	Microbe\, viral or environmental	189724854	NORTHERN ARIZONA UNIVERSITY	2021/2022	SRX27738927	USA	North America	USA: Arizona	Homo sapiens	Illumina MiSeq	naz51eff0_2	saliva	PAIRED	PCR	GENOMIC	Streptococcus mutans	ILLUMINA	2025-02-20T00:00:00Z	2025-02-20T03:40:00Z	1	naz759eb8a5	Swab collection media	SRP565161
SRR32408516	AMPLICON	302	9995294	PRJNA1225904	SAMN46908992	Microbe\, viral or environmental	3655593	NORTHERN ARIZONA UNIVERSITY	2021/2022	SRX27738830	USA	North America	USA: Arizona	Homo sapiens	Illumina MiSeq	naz5257e6_2	saliva	PAIRED	PCR	GENOMIC	Streptococcus mutans	ILLUMINA	2025-02-20T00:00:00Z	2025-02-20T03:40:00Z	1	nazdc5741a3	Swab collection media	SRP565161
SRR32408409	AMPLICON	602	79063068	PRJNA1225904	SAMN46908950	Microbe\, viral or environmental	45332196	NORTHERN ARIZONA UNIVERSITY	2021/2022	SRX27738937	USA	North America	USA: Arizona	Homo sapiens	Illumina MiSeq	naz5c458b_1	saliva	PAIRED	PCR	GENOMIC	Streptococcus mutans	ILLUMINA	2025-02-20T00:00:00Z	2025-02-20T03:40:00Z	1	naz85058531	Swab collection media	SRP565161
SRR32408424	AMPLICON	602	429463790	PRJNA1225904	SAMN46908950	Microbe\, viral or environmental	233547961	NORTHERN ARIZONA UNIVERSITY	2021/2022	SRX27738922	USA	North America	USA: Arizona	Homo sapiens	Illumina MiSeq	naz5c458b_1	saliva	PAIRED	PCR	GENOMIC	Streptococcus mutans	ILLUMINA	2025-02-20T00:00:00Z	2025-02-20T03:40:00Z	1	naz85058531	Swab collection media	SRP565161
SRR32408429	AMPLICON	602	73720920	PRJNA1225904	SAMN46908946	Microbe\, viral or environmental	42967508	NORTHERN ARIZONA UNIVERSITY	2021/2022	SRX27738917	USA	North America	USA: Arizona	Homo sapiens	Illumina MiSeq	naz5e76c8_2	saliva	PAIRED	PCR	GENOMIC	Streptococcus mutans	ILLUMINA	2025-02-20T00:00:00Z	2025-02-20T03:40:00Z	1	naz810777cb	Swab collection media	SRP565161
SRR32408408	AMPLICON	302	16795126	PRJNA1225904	SAMN46908990	Microbe\, viral or environmental	5891281	NORTHERN ARIZONA UNIVERSITY	2021/2022	SRX27738938	USA	North America	USA: Arizona	Homo sapiens	Illumina MiSeq	naz5ed046_1	saliva	PAIRED	PCR	GENOMIC	Streptococcus mutans	ILLUMINA	2025-02-20T00:00:00Z	2025-02-20T03:39:00Z	1	nazcfa32a08	Swab collection media	SRP565161
SRR32408531	AMPLICON	302	9870870	PRJNA1225904	SAMN46908930	Microbe\, viral or environmental	3775126	NORTHERN ARIZONA UNIVERSITY	2021/2022	SRX27738815	USA	North America	USA: Arizona	Homo sapiens	Illumina MiSeq	naz5fbd8b_1	saliva	PAIRED	PCR	GENOMIC	Streptococcus mutans	ILLUMINA	2025-02-20T00:00:00Z	2025-02-20T03:40:00Z	1	naz54c6642d	Swab collection media	SRP565161
SRR32408554	AMPLICON	302	7712476	PRJNA1225904	SAMN46908932	Microbe\, viral or environmental	2932740	NORTHERN ARIZONA UNIVERSITY	2021/2022	SRX27738792	USA	North America	USA: Arizona	Homo sapiens	Illumina MiSeq	naz5fbd8b_3	saliva	PAIRED	PCR	GENOMIC	Streptococcus mutans	ILLUMINA	2025-02-20T00:00:00Z	2025-02-20T03:40:00Z	1	naz62bc3897	Swab collection media	SRP565161
SRR32408481	AMPLICON	302	2048164	PRJNA1225904	SAMN46909005	Microbe\, viral or environmental	782833	NORTHERN ARIZONA UNIVERSITY	2021/2022	SRX27738866	USA	North America	USA: Arizona	Homo sapiens	Illumina MiSeq	naz615974_1	saliva	PAIRED	PCR	GENOMIC	Streptococcus mutans	ILLUMINA	2025-02-20T00:00:00Z	2025-02-20T03:40:00Z	1	nazf5c52ded	Swab collection media	SRP565161
SRR32408468	AMPLICON	302	8991748	PRJNA1225904	SAMN46908957	Microbe\, viral or environmental	3223220	NORTHERN ARIZONA UNIVERSITY	2021/2022	SRX27738879	USA	North America	USA: Arizona	Homo sapiens	Illumina MiSeq	naz6356e1_2	saliva	PAIRED	PCR	GENOMIC	Streptococcus mutans	ILLUMINA	2025-02-20T00:00:00Z	2025-02-20T03:40:00Z	1	naz926b347d	Swab collection media	SRP565161
SRR32408561	AMPLICON	302	7240148	PRJNA1225904	SAMN46908988	Microbe\, viral or environmental	2872656	NORTHERN ARIZONA UNIVERSITY	2021/2022	SRX27738785	USA	North America	USA: Arizona	Homo sapiens	Illumina MiSeq	naz639675_2	saliva	PAIRED	PCR	GENOMIC	Streptococcus mutans	ILLUMINA	2025-02-20T00:00:00Z	2025-02-20T03:40:00Z	1	nazcc07bfe6	Swab collection media	SRP565161
SRR32408535	AMPLICON	302	9284386	PRJNA1225904	SAMN46908974	Microbe\, viral or environmental	3297757	NORTHERN ARIZONA UNIVERSITY	2021/2022	SRX27738811	USA	North America	USA: Arizona	Homo sapiens	Illumina MiSeq	naz64c2cb_1	saliva	PAIRED	PCR	GENOMIC	Streptococcus mutans	ILLUMINA	2025-02-20T00:00:00Z	2025-02-20T03:40:00Z	1	nazba0d9989	Swab collection media	SRP565161
SRR32408550	AMPLICON	302	1926458	PRJNA1225904	SAMN46908948	Microbe\, viral or environmental	735522	NORTHERN ARIZONA UNIVERSITY	2021/2022	SRX27738796	USA	North America	USA: Arizona	Homo sapiens	Illumina MiSeq	naz6828ab_3	saliva	PAIRED	PCR	GENOMIC	Streptococcus mutans	ILLUMINA	2025-02-20T00:00:00Z	2025-02-20T03:40:00Z	1	naz83533379	Swab collection media	SRP565161
SRR32408534	AMPLICON	602	71113658	PRJNA1225904	SAMN46908933	Microbe\, viral or environmental	41838462	NORTHERN ARIZONA UNIVERSITY	2021/2022	SRX27738812	USA	North America	USA: Arizona	Homo sapiens	Illumina MiSeq	naz6e1c42_2	saliva	PAIRED	PCR	GENOMIC	Streptococcus mutans	ILLUMINA	2025-02-20T00:00:00Z	2025-02-20T03:41:00Z	1	naz66df0e92	Swab collection media	SRP565161
SRR32408390	AMPLICON	302	22321726	PRJNA1225904	SAMN46908967	Microbe\, viral or environmental	7554245	NORTHERN ARIZONA UNIVERSITY	2021/2022	SRX27738956	USA	North America	USA: Arizona	Homo sapiens	Illumina MiSeq	naz701789_1	saliva	PAIRED	PCR	GENOMIC	Streptococcus mutans	ILLUMINA	2025-02-20T00:00:00Z	2025-02-20T03:39:00Z	1	naza94265ef	Swab collection media	SRP565161
SRR32408506	AMPLICON	302	4618184	PRJNA1225904	SAMN46908913	Microbe\, viral or environmental	1652289	NORTHERN ARIZONA UNIVERSITY	2021/2022	SRX27738840	USA	North America	USA: Arizona	Homo sapiens	Illumina MiSeq	naz7217d4_2	saliva	PAIRED	PCR	GENOMIC	Streptococcus mutans	ILLUMINA	2025-02-20T00:00:00Z	2025-02-20T03:40:00Z	1	naz22c4efda	Swab collection media	SRP565161
SRR32408400	AMPLICON	302	8899940	PRJNA1225904	SAMN46908906	Microbe\, viral or environmental	3340063	NORTHERN ARIZONA UNIVERSITY	2021/2022	SRX27738946	USA	North America	USA: Arizona	Homo sapiens	Illumina MiSeq	naz724e1c_1	saliva	PAIRED	PCR	GENOMIC	Streptococcus mutans	ILLUMINA	2025-02-20T00:00:00Z	2025-02-20T03:39:00Z	1	naz1280b9d0	Swab collection media	SRP565161
SRR32408488	AMPLICON	302	190161850	PRJNA1225904	SAMN46908989	Microbe\, viral or environmental	69847761	NORTHERN ARIZONA UNIVERSITY	2021/2022	SRX27738858	USA	North America	USA: Arizona	Homo sapiens	Illumina MiSeq	naz73a141_1	saliva	PAIRED	PCR	GENOMIC	Streptococcus mutans	ILLUMINA	2025-02-20T00:00:00Z	2025-02-20T03:40:00Z	1	nazce95069b	Swab collection media	SRP565161
SRR32408478	AMPLICON	302	527348474	PRJNA1225904	SAMN46908991	Microbe\, viral or environmental	193754702	NORTHERN ARIZONA UNIVERSITY	2021/2022	SRX27738869	USA	North America	USA: Arizona	Homo sapiens	Illumina MiSeq	naz74048e_2	saliva	PAIRED	PCR	GENOMIC	Streptococcus mutans	ILLUMINA	2025-02-20T00:00:00Z	2025-02-20T03:40:00Z	1	nazd6a69850	Swab collection media	SRP565161
SRR32408546	AMPLICON	602	310539292	PRJNA1225904	SAMN46908951	Microbe\, viral or environmental	183005460	NORTHERN ARIZONA UNIVERSITY	2021/2022	SRX27738800	USA	North America	USA: Arizona	Homo sapiens	Illumina MiSeq	naz765f3f_2	saliva	PAIRED	PCR	GENOMIC	Streptococcus mutans	ILLUMINA	2025-02-20T00:00:00Z	2025-02-20T03:40:00Z	1	naz85bb5266	Swab collection media	SRP565161
SRR32408557	AMPLICON	602	70924028	PRJNA1225904	SAMN46908951	Microbe\, viral or environmental	42411294	NORTHERN ARIZONA UNIVERSITY	2021/2022	SRX27738789	USA	North America	USA: Arizona	Homo sapiens	Illumina MiSeq	naz765f3f_2	saliva	PAIRED	PCR	GENOMIC	Streptococcus mutans	ILLUMINA	2025-02-20T00:00:00Z	2025-02-20T03:40:00Z	1	naz85bb5266	Swab collection media	SRP565161
SRR32408492	AMPLICON	302	1499430	PRJNA1225904	SAMN46908999	Microbe\, viral or environmental	590984	NORTHERN ARIZONA UNIVERSITY	2021/2022	SRX27738854	USA	North America	USA: Arizona	Homo sapiens	Illumina MiSeq	naz781abb_2	saliva	PAIRED	PCR	GENOMIC	Streptococcus mutans	ILLUMINA	2025-02-20T00:00:00Z	2025-02-20T03:40:00Z	1	naze90e27cc	Swab collection media	SRP565161
SRR32408509	AMPLICON	602	322832132	PRJNA1225904	SAMN46908949	Microbe\, viral or environmental	185002652	NORTHERN ARIZONA UNIVERSITY	2021/2022	SRX27738837	USA	North America	USA: Arizona	Homo sapiens	Illumina MiSeq	naz81ebab_1	saliva	PAIRED	PCR	GENOMIC	Streptococcus mutans	ILLUMINA	2025-02-20T00:00:00Z	2025-02-20T03:40:00Z	1	naz848d7fc1	Swab collection media	SRP565161
SRR32408410	AMPLICON	502	223051150	PRJNA1225904	SAMN46908980	Microbe\, viral or environmental	156268179	NORTHERN ARIZONA UNIVERSITY	2021/2022	SRX27738936	USA	North America	USA: Arizona	Homo sapiens	Illumina MiSeq	naz81ebab_2	saliva	PAIRED	PCR	GENOMIC	Streptococcus mutans	ILLUMINA	2025-02-20T00:00:00Z	2025-02-20T03:40:00Z	1	nazc16a72ef	Swab collection media	SRP565161
SRR32408403	AMPLICON	302	16351790	PRJNA1225904	SAMN46908973	Microbe\, viral or environmental	5688773	NORTHERN ARIZONA UNIVERSITY	2021/2022	SRX27738943	USA	North America	USA: Arizona	Homo sapiens	Illumina MiSeq	naz83b1e0_2	saliva	PAIRED	PCR	GENOMIC	Streptococcus mutans	ILLUMINA	2025-02-20T00:00:00Z	2025-02-20T03:39:00Z	1	nazb9cbb325	Swab collection media	SRP565161
SRR32408518	AMPLICON	302	3035100	PRJNA1225904	SAMN46908966	Microbe\, viral or environmental	1123691	NORTHERN ARIZONA UNIVERSITY	2021/2022	SRX27738828	USA	North America	USA: Arizona	Homo sapiens	Illumina MiSeq	naz8b14ce_1	saliva	PAIRED	PCR	GENOMIC	Streptococcus mutans	ILLUMINA	2025-02-20T00:00:00Z	2025-02-20T03:40:00Z	1	naza542a636	Swab collection media	SRP565161
SRR32408486	AMPLICON	302	14693206	PRJNA1225904	SAMN46908970	Microbe\, viral or environmental	5413597	NORTHERN ARIZONA UNIVERSITY	2021/2022	SRX27738860	USA	North America	USA: Arizona	Homo sapiens	Illumina MiSeq	naz9103b6_2	saliva	PAIRED	PCR	GENOMIC	Streptococcus mutans	ILLUMINA	2025-02-20T00:00:00Z	2025-02-20T03:40:00Z	1	nazb0efd773	Swab collection media	SRP565161
SRR32408499	AMPLICON	602	113318072	PRJNA1225904	SAMN46908958	Microbe\, viral or environmental	67397563	NORTHERN ARIZONA UNIVERSITY	2021/2022	SRX27738847	USA	North America	USA: Arizona	Homo sapiens	Illumina MiSeq	naz9164e6_1	saliva	PAIRED	PCR	GENOMIC	Streptococcus mutans	ILLUMINA	2025-02-20T00:00:00Z	2025-02-20T03:40:00Z	1	naz931dba80	Swab collection media	SRP565161
SRR32408524	AMPLICON	302	8012362	PRJNA1225904	SAMN46908909	Microbe\, viral or environmental	2930232	NORTHERN ARIZONA UNIVERSITY	2021/2022	SRX27738822	USA	North America	USA: Arizona	Homo sapiens	Illumina MiSeq	naz9687e8_2	saliva	PAIRED	PCR	GENOMIC	Streptococcus mutans	ILLUMINA	2025-02-20T00:00:00Z	2025-02-20T03:40:00Z	1	naz1401a061	Swab collection media	SRP565161
SRR32408469	AMPLICON	302	2336574	PRJNA1225904	SAMN46908995	Microbe\, viral or environmental	876845	NORTHERN ARIZONA UNIVERSITY	2021/2022	SRX27738878	USA	North America	USA: Arizona	Homo sapiens	Illumina MiSeq	naz9d0073_3	saliva	PAIRED	PCR	GENOMIC	Streptococcus mutans	ILLUMINA	2025-02-20T00:00:00Z	2025-02-20T03:39:00Z	1	naze3fe905d	Swab collection media	SRP565161
SRR32408399	AMPLICON	302	9710508	PRJNA1225904	SAMN46908963	Microbe\, viral or environmental	3417328	NORTHERN ARIZONA UNIVERSITY	2021/2022	SRX27738947	USA	North America	USA: Arizona	Homo sapiens	Illumina MiSeq	naza2917b_2	saliva	PAIRED	PCR	GENOMIC	Streptococcus mutans	ILLUMINA	2025-02-20T00:00:00Z	2025-02-20T03:39:00Z	1	naz9a8a1341	Swab collection media	SRP565161
SRR32408421	AMPLICON	302	8100244	PRJNA1225904	SAMN46909001	Microbe\, viral or environmental	2991574	NORTHERN ARIZONA UNIVERSITY	2021/2022	SRX27738925	USA	North America	USA: Arizona	Homo sapiens	Illumina MiSeq	naza451ef_2	saliva	PAIRED	PCR	GENOMIC	Streptococcus mutans	ILLUMINA	2025-02-20T00:00:00Z	2025-02-20T03:39:00Z	1	nazee6939e7	Swab collection media	SRP565161
SRR32408484	AMPLICON	586	228514802	PRJNA1225904	SAMN46908925	Microbe\, viral or environmental	144569853	NORTHERN ARIZONA UNIVERSITY	2021/2022	SRX27738863	USA	North America	USA: Arizona	Homo sapiens	Illumina MiSeq	naza65246_2	saliva	PAIRED	PCR	GENOMIC	Streptococcus mutans	ILLUMINA	2025-02-20T00:00:00Z	2025-02-20T03:40:00Z	1	naz3c1458f1	Swab collection media	SRP565161
SRR32408538	AMPLICON	302	9412132	PRJNA1225904	SAMN46908961	Microbe\, viral or environmental	3473295	NORTHERN ARIZONA UNIVERSITY	2021/2022	SRX27738808	USA	North America	USA: Arizona	Homo sapiens	Illumina MiSeq	naza65246_3	saliva	PAIRED	PCR	GENOMIC	Streptococcus mutans	ILLUMINA	2025-02-20T00:00:00Z	2025-02-20T03:40:00Z	1	naz971ea568	Swab collection media	SRP565161
SRR32408444	AMPLICON	602	263250988	PRJNA1225904	SAMN46908911	Microbe\, viral or environmental	168579346	NORTHERN ARIZONA UNIVERSITY	2021/2022	SRX27738902	USA	North America	USA: Arizona	Homo sapiens	Illumina MiSeq	nazaa3559_1	saliva	PAIRED	PCR	GENOMIC	Streptococcus mutans	ILLUMINA	2025-02-20T00:00:00Z	2025-02-20T03:40:00Z	1	naz19554df5	Swab collection media	SRP565161
SRR32408560	AMPLICON	302	1780894	PRJNA1225904	SAMN46908981	Microbe\, viral or environmental	696965	NORTHERN ARIZONA UNIVERSITY	2021/2022	SRX27738786	USA	North America	USA: Arizona	Homo sapiens	Illumina MiSeq	nazaa694c_2	saliva	PAIRED	PCR	GENOMIC	Streptococcus mutans	ILLUMINA	2025-02-20T00:00:00Z	2025-02-20T03:40:00Z	1	nazc249bfbd	Swab collection media	SRP565161
SRR32408555	AMPLICON	302	1262058	PRJNA1225904	SAMN46909004	Microbe\, viral or environmental	503695	NORTHERN ARIZONA UNIVERSITY	2021/2022	SRX27738791	USA	North America	USA: Arizona	Homo sapiens	Illumina MiSeq	nazafef3a_2	saliva	PAIRED	PCR	GENOMIC	Streptococcus mutans	ILLUMINA	2025-02-20T00:00:00Z	2025-02-20T03:40:00Z	1	nazf5707b68	Swab collection media	SRP565161
SRR32408551	AMPLICON	302	14680220	PRJNA1225904	SAMN46908984	Microbe\, viral or environmental	5253644	NORTHERN ARIZONA UNIVERSITY	2021/2022	SRX27738795	USA	North America	USA: Arizona	Homo sapiens	Illumina MiSeq	nazb2b4a8_2	saliva	PAIRED	PCR	GENOMIC	Streptococcus mutans	ILLUMINA	2025-02-20T00:00:00Z	2025-02-20T03:40:00Z	1	nazc4ae9093	Swab collection media	SRP565161
SRR32408437	AMPLICON	302	8699110	PRJNA1225904	SAMN46908907	Microbe\, viral or environmental	3257405	NORTHERN ARIZONA UNIVERSITY	2021/2022	SRX27738909	USA	North America	USA: Arizona	Homo sapiens	Illumina MiSeq	nazb447d8_1	saliva	PAIRED	PCR	GENOMIC	Streptococcus mutans	ILLUMINA	2025-02-20T00:00:00Z	2025-02-20T03:39:00Z	1	naz131ad8db	Swab collection media	SRP565161
SRR32408395	AMPLICON	302	8251546	PRJNA1225904	SAMN46908919	Microbe\, viral or environmental	3118022	NORTHERN ARIZONA UNIVERSITY	2021/2022	SRX27738951	USA	North America	USA: Arizona	Homo sapiens	Illumina MiSeq	nazbacadb_2	saliva	PAIRED	PCR	GENOMIC	Streptococcus mutans	ILLUMINA	2025-02-20T00:00:00Z	2025-02-20T03:39:00Z	1	naz2b058370	Swab collection media	SRP565161
SRR32408388	AMPLICON	302	286594980	PRJNA1225904	SAMN46908944	Microbe\, viral or environmental	100312238	NORTHERN ARIZONA UNIVERSITY	2021/2022	SRX27738958	USA	North America	USA: Arizona	Homo sapiens	Illumina MiSeq	nazbad20a_2	saliva	PAIRED	PCR	GENOMIC	Streptococcus mutans	ILLUMINA	2025-02-20T00:00:00Z	2025-02-20T03:40:00Z	1	naz796464f1	Swab collection media	SRP565161
SRR32408549	AMPLICON	602	89407234	PRJNA1225904	SAMN46908910	Microbe\, viral or environmental	56827699	NORTHERN ARIZONA UNIVERSITY	2021/2022	SRX27738797	USA	North America	USA: Arizona	Homo sapiens	Illumina MiSeq	nazbd7532_1	saliva	PAIRED	PCR	GENOMIC	Streptococcus mutans	ILLUMINA	2025-02-20T00:00:00Z	2025-02-20T03:41:00Z	1	naz18adee46	Swab collection media	SRP565161
SRR32408514	AMPLICON	302	10113074	PRJNA1225904	SAMN46908926	Microbe\, viral or environmental	3615213	NORTHERN ARIZONA UNIVERSITY	2021/2022	SRX27738832	USA	North America	USA: Arizona	Homo sapiens	Illumina MiSeq	nazbfc540_2	saliva	PAIRED	PCR	GENOMIC	Streptococcus mutans	ILLUMINA	2025-02-20T00:00:00Z	2025-02-20T03:40:00Z	1	naz44e459bf	Swab collection media	SRP565161
SRR32408449	AMPLICON	302	20644720	PRJNA1225904	SAMN46908935	Microbe\, viral or environmental	7845370	NORTHERN ARIZONA UNIVERSITY	2021/2022	SRX27738897	USA	North America	USA: Arizona	Homo sapiens	Illumina MiSeq	nazc02060_2	saliva	PAIRED	PCR	GENOMIC	Streptococcus mutans	ILLUMINA	2025-02-20T00:00:00Z	2025-02-20T03:40:00Z	1	naz6c1ffb4f	Swab collection media	SRP565161
SRR32408458	AMPLICON	302	8574082	PRJNA1225904	SAMN46908965	Microbe\, viral or environmental	3013153	NORTHERN ARIZONA UNIVERSITY	2021/2022	SRX27738888	USA	North America	USA: Arizona	Homo sapiens	Illumina MiSeq	nazc08083_3	saliva	PAIRED	PCR	GENOMIC	Streptococcus mutans	ILLUMINA	2025-02-20T00:00:00Z	2025-02-20T03:40:00Z	1	naza4747729	Swab collection media	SRP565161
SRR32408543	AMPLICON	302	18880134	PRJNA1225904	SAMN46908947	Microbe\, viral or environmental	6600215	NORTHERN ARIZONA UNIVERSITY	2021/2022	SRX27738803	USA	North America	USA: Arizona	Homo sapiens	Illumina MiSeq	nazc37403_1	saliva	PAIRED	PCR	GENOMIC	Streptococcus mutans	ILLUMINA	2025-02-20T00:00:00Z	2025-02-20T03:40:00Z	1	naz827a3511	Swab collection media	SRP565161
SRR32408495	AMPLICON	302	12113220	PRJNA1225904	SAMN46908953	Microbe\, viral or environmental	4272061	NORTHERN ARIZONA UNIVERSITY	2021/2022	SRX27738851	USA	North America	USA: Arizona	Homo sapiens	Illumina MiSeq	nazc422c6_1	saliva	PAIRED	PCR	GENOMIC	Streptococcus mutans	ILLUMINA	2025-02-20T00:00:00Z	2025-02-20T03:40:00Z	1	naz888b130b	Swab collection media	SRP565161
SRR32408533	AMPLICON	302	1342088	PRJNA1225904	SAMN46908959	Microbe\, viral or environmental	528524	NORTHERN ARIZONA UNIVERSITY	2021/2022	SRX27738813	USA	North America	USA: Arizona	Homo sapiens	Illumina MiSeq	nazc422c6_2	saliva	PAIRED	PCR	GENOMIC	Streptococcus mutans	ILLUMINA	2025-02-20T00:00:00Z	2025-02-20T03:40:00Z	1	naz939f4791	Swab collection media	SRP565161
SRR32408494	AMPLICON	302	13792642	PRJNA1225904	SAMN46908983	Microbe\, viral or environmental	5267893	NORTHERN ARIZONA UNIVERSITY	2021/2022	SRX27738852	USA	North America	USA: Arizona	Homo sapiens	Illumina MiSeq	nazc5b446_1	saliva	PAIRED	PCR	GENOMIC	Streptococcus mutans	ILLUMINA	2025-02-20T00:00:00Z	2025-02-20T03:40:00Z	1	nazc41eafca	Swab collection media	SRP565161
SRR32408505	AMPLICON	302	9535650	PRJNA1225904	SAMN46908997	Microbe\, viral or environmental	3289055	NORTHERN ARIZONA UNIVERSITY	2021/2022	SRX27738841	USA	North America	USA: Arizona	Homo sapiens	Illumina MiSeq	nazc8b407_1	saliva	PAIRED	PCR	GENOMIC	Streptococcus mutans	ILLUMINA	2025-02-20T00:00:00Z	2025-02-20T03:40:00Z	1	naze58b1969	Swab collection media	SRP565161
SRR32408406	AMPLICON	586	292420446	PRJNA1225904	SAMN46908915	Microbe\, viral or environmental	182863397	NORTHERN ARIZONA UNIVERSITY	2021/2022	SRX27738940	USA	North America	USA: Arizona	Homo sapiens	Illumina MiSeq	nazc8b407_2	saliva	PAIRED	PCR	GENOMIC	Streptococcus mutans	ILLUMINA	2025-02-20T00:00:00Z	2025-02-20T03:40:00Z	1	naz23ed1edf	Swab collection media	SRP565161
SRR32408404	AMPLICON	602	244211534	PRJNA1225904	SAMN46908982	Microbe\, viral or environmental	148121081	NORTHERN ARIZONA UNIVERSITY	2021/2022	SRX27738942	USA	North America	USA: Arizona	Homo sapiens	Illumina MiSeq	nazcbe5a6_1	saliva	PAIRED	PCR	GENOMIC	Streptococcus mutans	ILLUMINA	2025-02-20T00:00:00Z	2025-02-20T03:40:00Z	1	nazc351f86f	Swab collection media	SRP565161
SRR32408489	AMPLICON	602	47621210	PRJNA1225904	SAMN46908982	Microbe\, viral or environmental	28066624	NORTHERN ARIZONA UNIVERSITY	2021/2022	SRX27738857	USA	North America	USA: Arizona	Homo sapiens	Illumina MiSeq	nazcbe5a6_1	saliva	PAIRED	PCR	GENOMIC	Streptococcus mutans	ILLUMINA	2025-02-20T00:00:00Z	2025-02-20T03:40:00Z	1	nazc351f86f	Swab collection media	SRP565161
SRR32408526	AMPLICON	302	2529250	PRJNA1225904	SAMN46908921	Microbe\, viral or environmental	938611	NORTHERN ARIZONA UNIVERSITY	2021/2022	SRX27738820	USA	North America	USA: Arizona	Homo sapiens	Illumina MiSeq	nazd35460_2	saliva	PAIRED	PCR	GENOMIC	Streptococcus mutans	ILLUMINA	2025-02-20T00:00:00Z	2025-02-20T03:40:00Z	1	naz320990d3	Swab collection media	SRP565161
SRR32408556	AMPLICON	302	8975138	PRJNA1225904	SAMN46908968	Microbe\, viral or environmental	3386928	NORTHERN ARIZONA UNIVERSITY	2021/2022	SRX27738790	USA	North America	USA: Arizona	Homo sapiens	Illumina MiSeq	nazd5e3e0_1	saliva	PAIRED	PCR	GENOMIC	Streptococcus mutans	ILLUMINA	2025-02-20T00:00:00Z	2025-02-20T03:40:00Z	1	nazb042fc97	Swab collection media	SRP565161
SRR32408491	AMPLICON	302	2264698	PRJNA1225904	SAMN46909006	Microbe\, viral or environmental	844850	NORTHERN ARIZONA UNIVERSITY	2021/2022	SRX27738855	USA	North America	USA: Arizona	Homo sapiens	Illumina MiSeq	nazd5e3e0_2	saliva	PAIRED	PCR	GENOMIC	Streptococcus mutans	ILLUMINA	2025-02-20T00:00:00Z	2025-02-20T03:40:00Z	1	nazf6109320	Swab collection media	SRP565161
SRR32408446	AMPLICON	302	6132110	PRJNA1225904	SAMN46908985	Microbe\, viral or environmental	2254683	NORTHERN ARIZONA UNIVERSITY	2021/2022	SRX27738900	USA	North America	USA: Arizona	Homo sapiens	Illumina MiSeq	nazd7fa9d_4	saliva	PAIRED	PCR	GENOMIC	Streptococcus mutans	ILLUMINA	2025-02-20T00:00:00Z	2025-02-20T03:39:00Z	1	nazc54bd04c	Swab collection media	SRP565161
SRR32408513	AMPLICON	302	7961928	PRJNA1225904	SAMN46908927	Microbe\, viral or environmental	2821955	NORTHERN ARIZONA UNIVERSITY	2021/2022	SRX27738833	USA	North America	USA: Arizona	Homo sapiens	Illumina MiSeq	nazde150a_1	saliva	PAIRED	PCR	GENOMIC	Streptococcus mutans	ILLUMINA	2025-02-20T00:00:00Z	2025-02-20T03:40:00Z	1	naz456b7607	Swab collection media	SRP565161
SRR32408562	AMPLICON	586	176508474	PRJNA1225904	SAMN46908905	Microbe\, viral or environmental	117179388	NORTHERN ARIZONA UNIVERSITY	2021/2022	SRX27738784	USA	North America	USA: Arizona	Homo sapiens	Illumina MiSeq	nazde3c72_1	saliva	PAIRED	PCR	GENOMIC	Streptococcus mutans	ILLUMINA	2025-02-20T00:00:00Z	2025-02-20T03:40:00Z	1	naz0b2fd8d3	Swab collection media	SRP565161
SRR32408431	AMPLICON	302	7589562	PRJNA1225904	SAMN46908972	Microbe\, viral or environmental	2730667	NORTHERN ARIZONA UNIVERSITY	2021/2022	SRX27738915	USA	North America	USA: Arizona	Homo sapiens	Illumina MiSeq	nazde3c72_2	saliva	PAIRED	PCR	GENOMIC	Streptococcus mutans	ILLUMINA	2025-02-20T00:00:00Z	2025-02-20T03:39:00Z	1	nazb941e230	Swab collection media	SRP565161
SRR32408542	AMPLICON	302	1853978	PRJNA1225904	SAMN46908956	Microbe\, viral or environmental	706981	NORTHERN ARIZONA UNIVERSITY	2021/2022	SRX27738804	USA	North America	USA: Arizona	Homo sapiens	Illumina MiSeq	nazde7c14_2	saliva	PAIRED	PCR	GENOMIC	Streptococcus mutans	ILLUMINA	2025-02-20T00:00:00Z	2025-02-20T03:40:00Z	1	naz921e91d4	Swab collection media	SRP565161
SRR32408502	AMPLICON	302	7599528	PRJNA1225904	SAMN46908969	Microbe\, viral or environmental	2715605	NORTHERN ARIZONA UNIVERSITY	2021/2022	SRX27738844	USA	North America	USA: Arizona	Homo sapiens	Illumina MiSeq	naze18111_2	saliva	PAIRED	PCR	GENOMIC	Streptococcus mutans	ILLUMINA	2025-02-20T00:00:00Z	2025-02-20T03:40:00Z	1	nazb096a348	Swab collection media	SRP565161
SRR32408432	AMPLICON	302	1820758	PRJNA1225904	SAMN46908943	Microbe\, viral or environmental	689795	NORTHERN ARIZONA UNIVERSITY	2021/2022	SRX27738914	USA	North America	USA: Arizona	Homo sapiens	Illumina MiSeq	naze6013e_4	saliva	PAIRED	PCR	GENOMIC	Streptococcus mutans	ILLUMINA	2025-02-20T00:00:00Z	2025-02-20T03:39:00Z	1	naz791ffd58	Swab collection media	SRP565161
SRR32408532	AMPLICON	302	15985162	PRJNA1225904	SAMN46908938	Microbe\, viral or environmental	5789732	NORTHERN ARIZONA UNIVERSITY	2021/2022	SRX27738814	USA	North America	USA: Arizona	Homo sapiens	Illumina MiSeq	naze60ebb_2	saliva	PAIRED	PCR	GENOMIC	Streptococcus mutans	ILLUMINA	2025-02-20T00:00:00Z	2025-02-20T03:40:00Z	1	naz7157472e	Swab collection media	SRP565161
SRR32408501	AMPLICON	302	7941996	PRJNA1225904	SAMN46909007	Microbe\, viral or environmental	2821882	NORTHERN ARIZONA UNIVERSITY	2021/2022	SRX27738845	USA	North America	USA: Arizona	Homo sapiens	Illumina MiSeq	naze7370f_2	saliva	PAIRED	PCR	GENOMIC	Streptococcus mutans	ILLUMINA	2025-02-20T00:00:00Z	2025-02-20T03:40:00Z	1	nazfdd99f52	Swab collection media	SRP565161
SRR32408442	AMPLICON	302	7058948	PRJNA1225904	SAMN46908979	Microbe\, viral or environmental	2695371	NORTHERN ARIZONA UNIVERSITY	2021/2022	SRX27738904	USA	North America	USA: Arizona	Homo sapiens	Illumina MiSeq	nazea4fcf_3	saliva	PAIRED	PCR	GENOMIC	Streptococcus mutans	ILLUMINA	2025-02-20T00:00:00Z	2025-02-20T03:39:00Z	1	nazbfec1271	Swab collection media	SRP565161
SRR32408418	AMPLICON	302	10363130	PRJNA1225904	SAMN46908937	Microbe\, viral or environmental	3715233	NORTHERN ARIZONA UNIVERSITY	2021/2022	SRX27738928	USA	North America	USA: Arizona	Homo sapiens	Illumina MiSeq	nazec397d_2	saliva	PAIRED	PCR	GENOMIC	Streptococcus mutans	ILLUMINA	2025-02-20T00:00:00Z	2025-02-20T03:39:00Z	1	naz7124238a	Swab collection media	SRP565161
SRR32408455	AMPLICON	302	18998518	PRJNA1225904	SAMN46908952	Microbe\, viral or environmental	6842496	NORTHERN ARIZONA UNIVERSITY	2021/2022	SRX27738891	USA	North America	USA: Arizona	Homo sapiens	Illumina MiSeq	nazec43a4_2	saliva	PAIRED	PCR	GENOMIC	Streptococcus mutans	ILLUMINA	2025-02-20T00:00:00Z	2025-02-20T03:40:00Z	1	naz86dfe944	Swab collection media	SRP565161
SRR32408553	AMPLICON	302	10967130	PRJNA1225904	SAMN46908908	Microbe\, viral or environmental	3838554	NORTHERN ARIZONA UNIVERSITY	2021/2022	SRX27738793	USA	North America	USA: Arizona	Homo sapiens	Illumina MiSeq	nazed5c28_2	saliva	PAIRED	PCR	GENOMIC	Streptococcus mutans	ILLUMINA	2025-02-20T00:00:00Z	2025-02-20T03:40:00Z	1	naz13372c19	Swab collection media	SRP565161
SRR32408476	AMPLICON	302	7043546	PRJNA1225904	SAMN46908942	Microbe\, viral or environmental	2519386	NORTHERN ARIZONA UNIVERSITY	2021/2022	SRX27738871	USA	North America	USA: Arizona	Homo sapiens	Illumina MiSeq	nazf05a01_2	saliva	PAIRED	PCR	GENOMIC	Streptococcus mutans	ILLUMINA	2025-02-20T00:00:00Z	2025-02-20T03:40:00Z	1	naz76da1332	Swab collection media	SRP565161
SRR32408544	AMPLICON	302	1360812	PRJNA1225904	SAMN46908975	Microbe\, viral or environmental	544893	NORTHERN ARIZONA UNIVERSITY	2021/2022	SRX27738802	USA	North America	USA: Arizona	Homo sapiens	Illumina MiSeq	nazf1cf5d_2	saliva	PAIRED	PCR	GENOMIC	Streptococcus mutans	ILLUMINA	2025-02-20T00:00:00Z	2025-02-20T03:40:00Z	1	nazbb6911ca	Swab collection media	SRP565161
SRR32408460	AMPLICON	302	7462420	PRJNA1225904	SAMN46908923	Microbe\, viral or environmental	2794103	NORTHERN ARIZONA UNIVERSITY	2021/2022	SRX27738862	USA	North America	USA: Arizona	Homo sapiens	Illumina MiSeq	nazf801f5_2	saliva	PAIRED	PCR	GENOMIC	Streptococcus mutans	ILLUMINA	2025-02-20T00:00:00Z	2025-02-20T03:40:00Z	1	naz342a83a2	Swab collection media	SRP565161
SRR32408508	AMPLICON	302	10920622	PRJNA1225904	SAMN46908902	Microbe\, viral or environmental	3712670	NORTHERN ARIZONA UNIVERSITY	2021/2022	SRX27738838	USA	North America	USA: Arizona	Homo sapiens	Illumina MiSeq	nazfc6b52_2	saliva	PAIRED	PCR	GENOMIC	Streptococcus mutans	ILLUMINA	2025-02-20T00:00:00Z	2025-02-20T03:40:00Z	1	naz043585b6	Swab collection media	SRP565161
SRR32408461	AMPLICON	302	3048086	PRJNA1225904	SAMN46908901	Microbe\, viral or environmental	1140755	NORTHERN ARIZONA UNIVERSITY	2021/2022	SRX27738886	USA	North America	USA: Arizona	Homo sapiens	Illumina MiSeq	nazfc708e_4	saliva	PAIRED	PCR	GENOMIC	Streptococcus mutans	ILLUMINA	2025-02-20T00:00:00Z	2025-02-20T03:39:00Z	1	naz03b95ba0	Swab collection media	SRP565161
SRR32408451	AMPLICON	586	175344092	PRJNA1225904	SAMN46908987	Microbe\, viral or environmental	101455671	NORTHERN ARIZONA UNIVERSITY	2021/2022	SRX27738895	USA	North America	USA: Arizona	Homo sapiens	Illumina MiSeq	nazfd3d67_2	saliva	PAIRED	PCR	GENOMIC	Streptococcus mutans	ILLUMINA	2025-02-20T00:00:00Z	2025-02-20T03:40:00Z	1	nazc95bfc29	Swab collection media	SRP565161
